# Supplementary material for: Palladium-catalyzed ring contraction reaction of naphthoquinones upon reaction with alkynes
Source: Royal Society of Chemistry journal article supplement (doi:10.1039/c6qo00045b), 2016-01-01

# Palladium-Catalyzed Ring-Contraction Reaction of Naphthalquinones Upon Reaction with Alkynes

Lei Wang, Jianwei Zhang, Ming Lang, and Jian Wang \*

School of Pharmaceutical Sciences

School of Medicine

Tsinghua University, China

Email: [wangjian2012@tsinghua.edu.cn](mailto:wangjian2012@tsinghua.edu.cn)

## Supporting Information

### Contents:

|                                                              |     |
|--------------------------------------------------------------|-----|
| 1. General Information                                       | S2  |
| 2. Starting materials                                        | S2  |
| 3. Optimization of reaction conditions                       | S3  |
| 4. Representative Procedure for Palladium-catalyzed Reaction | S5  |
| 5 <sup>13</sup> C-labeled experiments                        | S5  |
| 6. Synthetic transformations of <b>3a</b>                    | S9  |
| 7. Analytical Data                                           | S11 |
| 8. Reference                                                 | S23 |

## 1. General Information

Chemicals and solvents were purchased from commercial suppliers and used as received.  $^1\text{H}$  and  $^{13}\text{C}$  NMR spectra were recorded on a Bruker ACF300 (300 MHz) or a AMX500 (500 MHz) spectrometer. Chemical shifts were reported in parts per million (ppm), and the residual solvent peak was used as an internal reference: proton (chloroform  $\delta$  7.26), carbon (chloroform  $\delta$  77.0) or tetramethylsilane (TMS  $\delta$  0.00) was used as a reference. Multiplicity was indicated as follows: s (singlet), d (doublet), t (triplet), q (quartet), m (multiplet), dd (doublet of doublet), bs (broad singlet). Coupling constants were reported in Hertz (Hz). Low resolution mass spectra were obtained on a Finnigan/MAT LCQ spectrometer in ESI mode. All high resolution mass spectra were obtained on a Finnigan/MAT 95XL-T spectrometer. For thin layer chromatography (TLC), Merck pre-coated TLC plates (Merck 60 F254) were used, and compounds were visualized with a UV light at 254 nm. Further visualization was achieved by staining with iodine. Flash chromatography separations were performed on Merck 60 (0.040-0.063 mm) mesh silica gel.

## 2. Starting materials

Compounds 1a, 2k, 2n, 2o, 2p were commercially available. Compounds **1b-j**<sup>1</sup>, **2b-k**<sup>2</sup> were prepared according to literature, respectively.

### 3. Optimization of reaction conditions

**Table a.** Investigation of reaction parameters.<sup>[a]</sup>

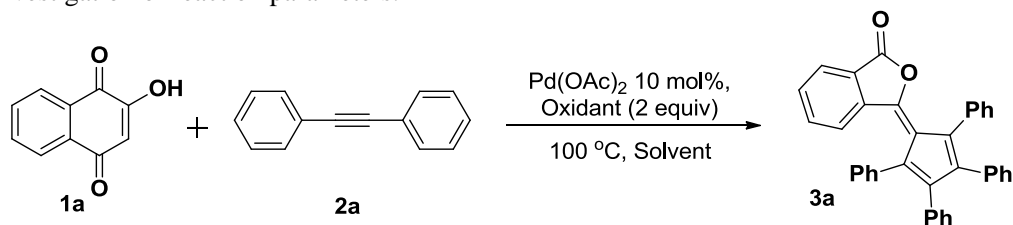

| Entry | Solvent | Catalyst             | Oxidant                                                                | Temp/ °C | Yield/% <sup>[b]</sup> |
|-------|---------|----------------------|------------------------------------------------------------------------|----------|------------------------|
| 1     | MeCN    | Pd(OAc) <sub>2</sub> | AgOAc                                                                  | 100      | 47%                    |
| 2     | MeCN    | Pd(OAc) <sub>2</sub> | AgI                                                                    | 100      | No reaction            |
| 3     | MeCN    | Pd(OAc) <sub>2</sub> | AgOCCF <sub>3</sub>                                                    | 100      | 55%                    |
| 4     | MeCN    | Pd(OAc) <sub>2</sub> | AgSbF <sub>6</sub>                                                     | 100      | <10%                   |
| 5     | MeCN    | Pd(OAc) <sub>2</sub> | Fe(OAc) <sub>2</sub>                                                   | 100      | 49%                    |
| 6     | MeCN    | Pd(OAc) <sub>2</sub> | FeCl <sub>3</sub>                                                      | 100      | <10%                   |
| 7     | MeCN    | Pd(OAc) <sub>2</sub> | Fe(CH <sub>3</sub> COCH <sub>2</sub> CCOCH <sub>3</sub> ) <sub>3</sub> | 100      | No reaction            |
| 8     | MeCN    | Pd(OAc) <sub>2</sub> | Fe(OAc) <sub>2</sub>                                                   | 100      | 49%                    |
| 9     | MeCN    | Pd(OAc) <sub>2</sub> | FeCl <sub>2</sub>                                                      | 100      | <10%                   |
| 10    | MeCN    | Pd(OAc) <sub>2</sub> | CuCl                                                                   | 100      | <10%                   |
| 11    | MeCN    | Pd(OAc) <sub>2</sub> | CuBr <sub>2</sub>                                                      | 100      | No reaction            |
| 12    | MeCN    | Pd(OAc) <sub>2</sub> | Cu(CH <sub>3</sub> ClO <sub>4</sub> ) <sub>2</sub>                     | 100      | No reaction            |
| 13    | MeCN    | Pd(OAc) <sub>2</sub> | CuOAc                                                                  | 100      | 16%                    |
| 14    | MeCN    | Pd(OAc) <sub>2</sub> | Cu(OAc) <sub>2</sub>                                                   | 100      | 21%                    |
| 15    | MeCN    | Pd(OAc) <sub>2</sub> | CuCl <sub>2</sub>                                                      | 100      | Compound 10            |
| 16    | MeCN    | Pd(OAc) <sub>2</sub> | CuI                                                                    | 100      | No reaction            |
| 17    | MeCN    | Pd(OAc) <sub>2</sub> | PhI(OAc) <sub>2</sub>                                                  | 100      | No reaction            |
| 18    | MeCN    | Pd(OAc) <sub>2</sub> | BQ                                                                     | 100      | 65%                    |
| 19    | MeCN    | Pd(OAc) <sub>2</sub> | Oxones                                                                 | 100      | Compound 9             |
| 20    | MeCN    | Pd(OAc) <sub>2</sub> | K <sub>2</sub> S <sub>2</sub> O <sub>8</sub>                           | 100      | No reaction            |
| 21    | MeCN    | Pd(OAc) <sub>2</sub> | (NH <sub>4</sub> ) <sub>2</sub> S <sub>2</sub> O <sub>8</sub>          | 100      | No reaction            |

|    |                     |                      |                            |     |     |
|----|---------------------|----------------------|----------------------------|-----|-----|
| 22 | MeCN/HOAc (1:1 v/v) | Pd(OAc) <sub>2</sub> | AgOAc/Fe(OAc) <sub>2</sub> | 100 | 55% |
| 23 | MeCN/HOAc (1:1 v/v) | Pd(OAc) <sub>2</sub> | AgOAc/Fe(OAc) <sub>2</sub> | 120 | 64% |
| 24 | MeCN/HOAc (1:1 v/v) | Pd(OAc) <sub>2</sub> | BQ                         | 100 | 60% |
| 25 | MeCN/HOAc (2:1 v/v) | Pd(OAc) <sub>2</sub> | BQ                         | 100 | 69% |
| 26 | MeCN/HOAc (3:1 v/v) | Pd(OAc) <sub>2</sub> | BQ                         | 100 | 81% |
| 27 | MeCN/HOAc (3:1 v/v) | Pd(OAc) <sub>2</sub> | BQ                         | 120 | 79% |
| 28 | MeCN/HOAc (3:1 v/v) | Pd(OAc) <sub>2</sub> | BQ                         | 80  | 53% |
| 29 | MeCN/HOAc (1:4 v/v) | Pd(OAc) <sub>2</sub> | BQ                         | 100 | 50% |
| 30 | MeCN/HOAc (3:1 v/v) | Pd(OAc) <sub>2</sub> | BQ/N <sub>2</sub>          | 100 | 75% |
| 31 | MeCN/HOAc (3:1 v/v) | Pd(OAc) <sub>2</sub> | BQ/O <sub>2</sub>          | 100 | 47% |

Reaction conditions: MeCN (2 mL), **1a** (0.2 mmol, 1.0 equiv.), **2a** (1.0 mmol, 5.0 equiv.), 10 mol% catalyst, oxidant (0.4 mmol, 2.0 equiv.) at 100 °C, 24 h.

**Table b.** Optimization of other parameters.<sup>[a]</sup>

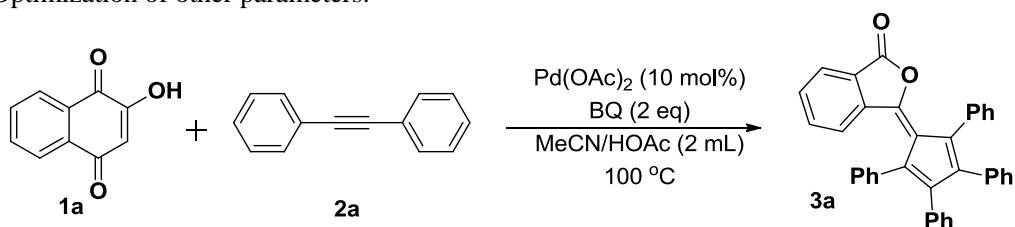

| Entry | Solvent             | Catalyst             | Oxidant | Temp/ °C | Yield/% <sup>[b]</sup> |
|-------|---------------------|----------------------|---------|----------|------------------------|
| 1     | MeCN/HOAc (3:1 v/v) | Pd(OAc) <sub>2</sub> | BQ      | 100      | 81%                    |
| 2     | MeOH                | Pd(OAc) <sub>2</sub> | BQ      | 100      | No reaction            |
| 3     | IPA                 | Pd(OAc) <sub>2</sub> | BQ      | 100      | No reaction            |
| 4     | THF                 | Pd(OAc) <sub>2</sub> | BQ      | 80       | 20%                    |
| 4     | MeCN                | Pd(OAc) <sub>2</sub> | BQ      | 100      | 65%                    |
| 5     | Diglyme             | Pd(OAc) <sub>2</sub> | BQ      | 100      | No reaction            |
| 6     | CHCl <sub>3</sub>   | Pd(OAc) <sub>2</sub> | BQ      | 80       | No reaction            |
| 7     | Toluene             | Pd(OAc) <sub>2</sub> | BQ      | 100      | No reaction            |
| 8     | 1,4-Dioxane         | Pd(OAc) <sub>2</sub> | BQ      | 100      | 30%                    |
| 9     | DCE                 | Pd(OAc) <sub>2</sub> | BQ      | 100      | No reaction            |

|    |      |                      |    |     |     |
|----|------|----------------------|----|-----|-----|
| 10 | DMA  | Pd(OAc) <sub>2</sub> | BQ | 100 | 56% |
| 11 | DMSO | Pd(OAc) <sub>2</sub> | BQ | 100 | 62% |
| 12 | DMF  | Pd(OAc) <sub>2</sub> | BQ | 100 | 32% |

Reaction condition: solvent (2 mL), 2-hydroxynaphthalene-1,4-dione **1a** (0.2 mmol, 1 equiv), diphenylacetylene **2a** (1 mmol, 5 equiv), 10 mol% catalyst, additives (0.4 mmol, 2 equiv), 80 or 100°C, 24 h.

#### 4. Representative Procedure for Palladium-catalyzed Reaction.

a) Procedure for **3a** synthesis:

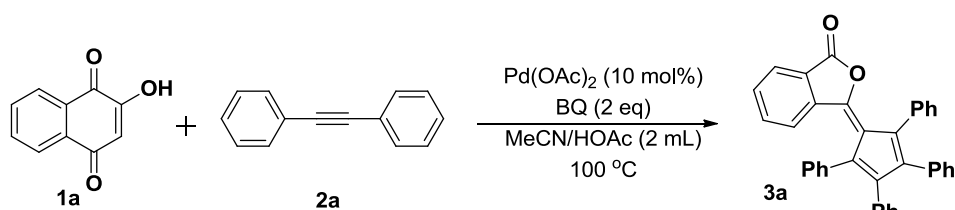

To a solution of diphenylacetylene **2a** (178.0 mg, 1.0 mmol) and 2-hydroxy-1,4-naphthoquinone **1a** (34.8 mg, 0.2 mmol) in 2.0 ml of MeCN/HOAc (v/v = 3:1), Pd(OAc)<sub>2</sub> (4.5 mg, 0.02 mmol) as catalyst and 1,4-benzoquinone (BQ) (43.2 mg, 0.4 mmol) as oxidant were added. The reaction was refluxed at 100 °C for 24 h. The reaction mixture was cooled to room temperature, poured into H<sub>2</sub>O and extracted with DCM for 3 times, combined organic layers were then dried over anhydrous MgSO<sub>4</sub>, filtered, and the solvent removed in-vacuum. The crude product was purified by column chromatography on silica gel, eluted by hexane/EtOAc=25:1 then 10:1 to afford 81.3 mg (81 % yield) of the desired product **3a** as dark green powder.

b) <sup>13</sup>C-labeled experiment:

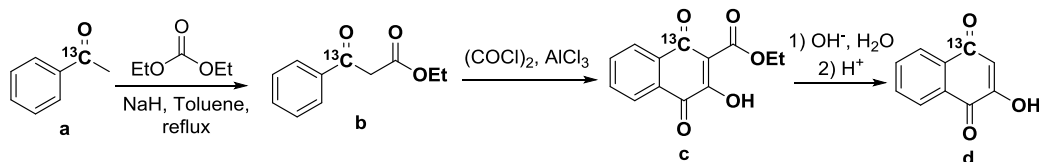

1) Procedure for preparing compound **d** (<sup>13</sup>C-labeled-2-hydroxy-1,4-naphthoquinone) <sup>[1,3]</sup>. To a dried two-necked flask equipped with a magnetic stirred, and condenser was added NaH (7.0 mmol), diethyl carbonate (5.0 mmol), and toluene (2.5 ml). The mixture was heated to reflux. A solution of ketone **a** (2.5 mmol) in toluene (1.5 ml) was added dropwise with syringe over 10-20 min. After the addition, the mixture was heated

to reflux until the evolution of hydrogen ceased (3.0 – 5.0 min.). When the reaction was cooled to room temperature, glacial acetic acid (5.0 mL) was added dropwise and a heavy, pasty solid appeared. Ice-water was added until the solid was dissolved completely. The toluene layer was separated, and the water layer was extracted with EtOAc three times. The combined organic solution was washed with water and brine, then dried over MgSO<sub>4</sub>. After evaporation of the solvent, the mixture was distilled under reduced pressure and subjected chromatography to give the desired β-keto esters **b** in 95% yield.

To a solution of β-keto esters **b** (2.0 mmol) in dry nitromethane (5.0 mL) under nitrogen was added AlCl<sub>3</sub> (6.0 mmol). After stirring for 15 min, oxalyl chloride (2.0 mmol) in dry nitromethane (2.0 mL) was added dropwise. After 15 min the solution was heated to 80 °C for 3 h. A solution of 10% aqueous oxalic acid was added under stirring at r.t. The resulting mixture was extracted with EtOAc (3 x 10 mL). The combined organic solution was washed with water and brine, dried over MgSO<sub>4</sub>. After evaporation of the solvent, the mixture was distilled under reduced pressure and subjected chromatography (DCM/EtOAc = 50:1 then 10:1) to give the desired β-Keto Ester Oxaloylation product **c** in 90% yield.

A solution of the compound **c** (1.5 mmol) in 5% aqueous NaOH (20 mL) was stirred at 60 °C for 8 h. A solution of 10% aqueous HCl (20 mL) was added, and heating was continued for 30 min. After cooling to r.t., the mixture was extracted with EtOAc (3 X 20 mL). The combined organic solution was washed with water and brine, dried over MgSO<sub>4</sub>. After evaporation of the solvent, the mixture was distilled under reduced pressure and subjected chromatography (DCM/EtOAc = 50:1 then 4:1) to give the desired <sup>13</sup>C-labeled-2-hydroxy-1, 4-naphthoquinone product **d** in 82% yield.

2) Procedure for **3a'a** synthesis:

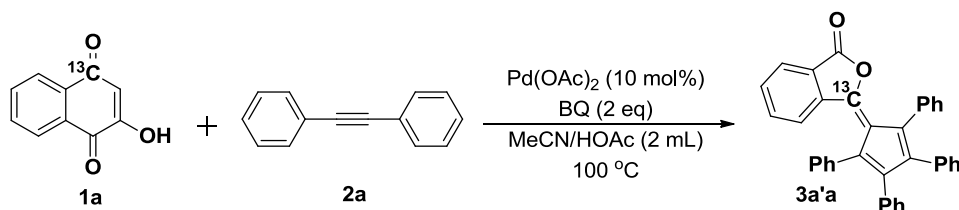

To a solution of diphenylacetylene **2a** (178.0 mg, 1.0 mmol) and 2-hydroxy-1,4-naphthoquinone **1a'** (35.0 mg, 0.2 mmol) in 2.0 ml MeCN/HOAc (v/v = 3:1), palladium acetate (4.5 mg, 0.02 mmol) as catalyst and 1,4-

Benzoquinone (43.2 mg, 0.4 mmol) as an oxidant were added. The reaction was refluxed at 100 °C for 24 h. The reaction mixture was cooled to room temperature, poured into H<sub>2</sub>O and extracted with DCM for 3 times, combined organic layers were then dried over anhydrous MgSO<sub>4</sub>, filtered, and the solvent removed in-vacuum. The crude product was purified by column chromatography on silica gel, eluted by hexane/EtOAc=25:1 then 10:1 to afford 78.3 mg (78 % yield) of the desired product **3a'a** as dark green powder.

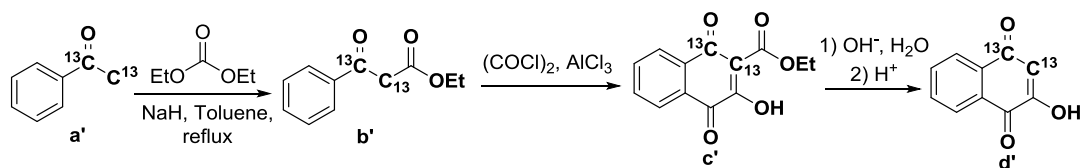

3) Procedure for **d'** synthesis<sup>[1,3]</sup>. To a dried two-necked flask equipped with a magnetic stirred, and condenser was added NaH (7.0 mmol), diethyl carbonate (5.0 mmol), and toluene (2.5 ml). The mixture was heated to reflux. A solution of ketone **a'** (2.5 mmol) in toluene (1.5 ml) was added dropwise with syringe over 10-20 min. After the addition, the mixture was heated to reflux until the evolution of hydrogen ceased (3.0 – 5.0 min.). When the reaction was cooled to room temperature, glacial acetic acid (5.0 mL) was added dropwise and a heavy, pasty solid appeared. Ice-water was added until the solid was dissolved completely. The toluene layer was separated, and the water layer was extracted with EtOAc three times. The combined organic solution was washed with water and brine, then dried over MgSO<sub>4</sub>. After evaporation of the solvent, the mixture was distilled under reduced pressure and subjected chromatography to give the desired β-keto esters **b'** in 92% yield.

To a solution of β-keto esters **b'** (2.0 mmol) in dry nitromethane (5.0 mL) under nitrogen was added AlCl<sub>3</sub> (6.0 mmol). After stirring for 15 min, oxalyl chloride (2.0 mmol) in dry nitromethane (2.0 mL) was added dropwise. After 15 min the solution was heated to 80 °C for 3 h. A solution of 10% aqueous oxalic acid was added under stirring at r.t. The resulting mixture was extracted with EtOAc (3 x 10 mL). The combined organic solution was washed with water and brine, dried over MgSO<sub>4</sub>. After evaporation of the solvent, the mixture was distilled under reduced pressure and subjected chromatography (DCM/EtOAc = 50:1 then 10:1) to give the desired β-Keto Ester Oxaloylation product **c'** in 87% yield.

A solution of the compound **c'** (1.5 mmol) in 5% aqueous NaOH (20 mL) was stirred at 60 °C for 8 h. A





## 5. Synthetic transformations of **3a**.

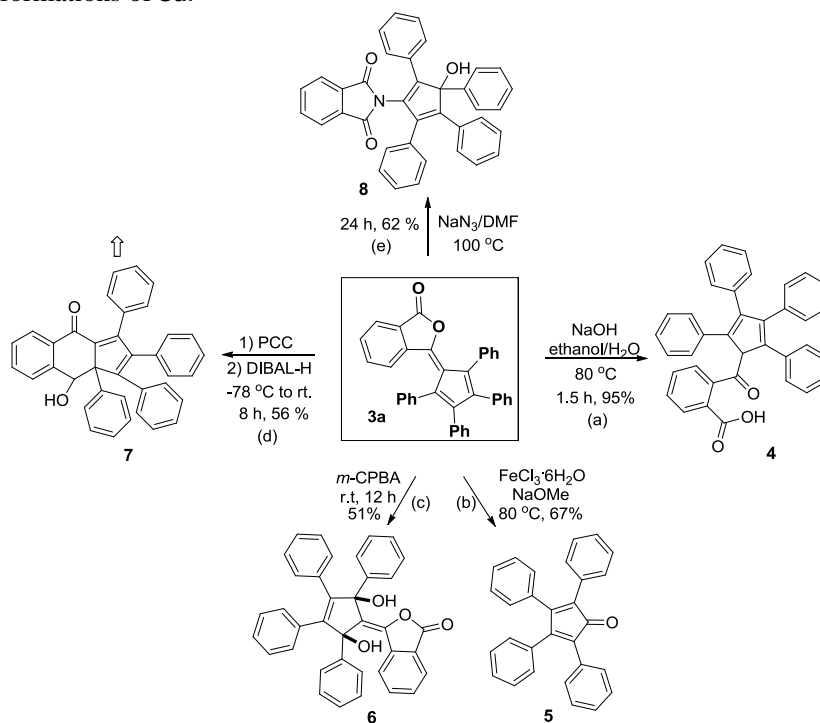

### Product **4**<sup>[4]</sup>

To a stirred solution of **3a** (100 mg, 0.2 mmol) in ethanol/H<sub>2</sub>O (2.0 mL, v/v = 1:1) was added aqueous NaOH (10 mol/L, 0.4 mL). The resulting mixture was stirred at 80 °C for 1.0 h. After complete conversion as indicated by TLC, aqueous HCl (4 mol/L, 0.6 mL) was dropped into the reaction system, the resulting mixture was stirred at r.t. for 0.5 h, the mixture was poured into H<sub>2</sub>O and extracted with DCM three times. The combined organic phases were dried over anhydrous MgSO<sub>4</sub>, filtered, and concentrated under reduced pressure. The crude product was purified by silica gel flash chromatography and eluted by hexane/EtOAc=10:1 then 1:1 to afford the product **4** (98.4 mg, 95 %) as pale yellow oil.

### Product **5**

To a stirred solution of **3a** (50.1 mg, 0.1 mmol) in EtOH (2.0 mL) was added FeCl<sub>3</sub>·6H<sub>2</sub>O (54.6 mg, 0.2 mmol), NaOMe (10.8 mg, 0.2 mmol). The resulting mixture was stirred at 80 °C for 24 h. After complete conversion as indicated by TLC, the solvent was removed by evaporation and the residue was directly purified by silica gel flash chromatography and eluted by hexane/EtOAc=100:1 to 20:1 to afford the product **5** (26.2 mg, 68 %) as red-dark powder.

### Product 6

To a stirred solution of **3a** (50.1 mg, 0.1 mmol) in DCM (2.0 mL) was added *m*-CPBA (34.6 mg, 0.2 mmol). The resulting mixture was stirred at r.t. for 0.5 h. After complete conversion as indicated by TLC, the solvent was removed by evaporation and the residue was directly purified by silica gel flash chromatography and eluted by hexane/EtOAc=20:1 to 4:1 afford the product **6** (27.2 mg, 51 % yield) as white solid.

### Product 7<sup>[5]</sup>

A solution of DIBAL-H (0.2 mmol, 1.0 M in CH<sub>2</sub>Cl<sub>2</sub>) was injected via a syringe into a stirred solution of **3a** (50.1 mg, 0.1 mmol) in anhydrous DCM (4 mL) at -78 °C under an Ar atmosphere. After stirring at -78 °C for 6 h, a catalytic amount of NaOMe (3.3 mg, 0.06 mmol) was added to the mixture and the solution was allowed to warm to r.t. for 12 h. The mixture was poured into sat. NH<sub>4</sub>Cl solution and extracted with DCM three times. The combined organic phases were dried over anhydrous MgSO<sub>4</sub>, filtered, and concentrated under reduced pressure to give an intermediate which without isolation was used in the next step. To a solution of the intermediate in DCM (2 mL) was added PCC (86 mg, 0.4 mmol) and the mixture was stirred for 12 h. Then, the mixture was poured into H<sub>2</sub>O and extracted with DCM three times. The combined organic phases were dried over anhydrous MgSO<sub>4</sub>, filtered, and concentrated under reduced pressure. The crude product was purified by silica gel flash chromatography and eluted by hexane/EtOAc = 20:1 then 4:1 to afford the product **6** (21.2 mg, 56 % yield) as white solid.

### Product 8<sup>[6]</sup>

To a stirred solution of **3a** (50.1 mg, 0.1 mmol) in DMF (2.0 mL) were added NaN<sub>3</sub> (32.5 mg, 0.5 mmol). The resulting mixture was stirred at 100 °C for 24 h. After complete conversion as indicated by TLC, the solvent was removed by evaporation and the residue was diluted with water and extracted with ethyl acetate (3 x 10.0 mL). The combined organic layers were dried over anhydrous MgSO<sub>4</sub> and concentrated *in vacuo*. The resulting product was purified by column chromatography on silica gel using hexane/ ethyl acetate (20:1 to 2:1) as eluent to afford the product **8** (32.9 mg, 62 %) as white solid.

## 6. Analytical Data.

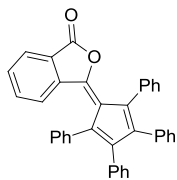

**3-(2,3,4,5-Tetraphenylcyclopenta-2,4-dienylidene)isobenzofuran-1(3H)-one (3a).** 81% yield;  $^1\text{H}$  NMR (500 MHz,  $\text{CDCl}_3$ ):  $\delta = 7.83$  (d,  $J = 7.6$  Hz, 1H), 7.42 (t,  $J = 7.5$  Hz, 1H), 7.29 – 7.25(m, 10H), 7.14 – 6.99 (m, 7H), 6.91 – 6.82 (m, 4H), 6.09 (d,  $J = 8.2$  Hz, 1H);  $^{13}\text{C}$  NMR (125 MHz,  $\text{CDCl}_3$ ):  $\delta = 165.42, 151.65, 147.02, 145.31, 138.01, 137.64, 135.75, 135.41, 134.57, 133.85, 131.49, 130.95, 130.76, 129.97, 129.32, 128.43, 127.94, 127.76, 127.61, 127.50, 127.07, 126.93, 126.88, 126.82, 125.70$ ; HRMS (ESI) calcd for  $\text{C}_{37}\text{H}_{24}\text{NaO}_2$   $[\text{M}+\text{Na}]^+$  523.1669, found 523.1679.

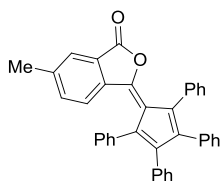

**5-Methyl-3-(2,3,4,5-tetraphenylcyclopenta-2,4-dienylidene)isobenzofuran-1(3H)-one (3b).** 82% yield;  $^1\text{H}$  NMR (500 MHz,  $\text{CDCl}_3$ ):  $\delta = 7.62$  (s, 1H), 7.29 – 7.26 (m, 10H), 7.11 – 6.95 (m, 6H), 6.93 (dd,  $J = 8.4, 1.6$  Hz, 1H), 6.88 – 6.86 (m, 2H), 6.83 – 6.82 (m, 2H), 5.93 (d,  $J = 8.4$  Hz, 1H), 2.38 (s, 3H);  $^{13}\text{C}$  NMR (125 MHz,  $\text{CDCl}_3$ ):  $\delta = 165.57, 151.97, 146.66, 144.93, 142.74, 138.15, 137.75, 135.85, 135.52, 135.10, 134.51, 131.56, 131.50, 130.97, 130.79, 130.77, 129.27, 129.10, 128.18, 127.89, 127.73, 127.58, 127.42, 127.17, 126.98, 126.84, 126.81, 125.81, 21.88$ ; HRMS (ESI) calcd for  $\text{C}_{38}\text{H}_{27}\text{O}_2$   $[\text{M}+\text{H}]^+$  515.2006, found 515.2015.

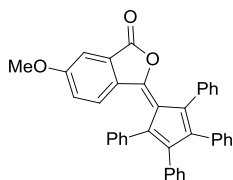

**5-Methoxy-3-(2,3,4,5-tetraphenylcyclopenta-2,4-dienylidene)isobenzofuran-1(3H)-one (3c).** 86% yield;  $^1\text{H}$  NMR (500 MHz,  $\text{CDCl}_3$ ):  $\delta = 7.25 - 7.23$  (m, 11H), 7.11 – 6.99 (m, 6H), 6.87 – 6.81 (m, 4H), 6.65 (dd,  $J = 9.0, 2.5$  Hz, 0H), 5.94 (d,  $J = 9.0$  Hz, 0H), 3.84 (s, 1H);  $^{13}\text{C}$  NMR (125 MHz,  $\text{CDCl}_3$ ):  $\delta = 165.52, 162.63, 151.94, 146.35, 144.62, 138.22, 137.76, 135.92, 135.61, 134.43, 131.52, 131.01, 130.81, 130.62, 129.72, 129.30,$

129.11, 128.29, 127.87, 127.72, 127.58, 127.42, 126.94, 126.79, 122.42, 107.80, 56.38; HRMS (ESI) calcd for  $C_{38}H_{27}O_3$   $[M+H]^+$  531.1995, found 531.1963.

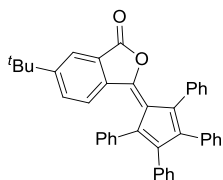

**5-Tert-butyl-3-(2,3,4,5-tetraphenylcyclopenta-2,4-dienylidene)isobenzofuran-1(3H)-one (3d).** 72% yield;  $^1H$  NMR (500 MHz,  $CDCl_3$ ):  $\delta$  = 7.81 (d,  $J$  = 1.9 Hz, 1H), 7.30 – 7.23 (m, 10H), 7.15 – 7.00 (m, 7H), 6.88 – 6.86 (m, 2H), 6.83 – 6.81 (m, 2H), 5.91 (d,  $J$  = 8.5 Hz, 1H), 1.27 (s, 9H);  $^{13}C$  NMR (125 MHz,  $CDCl_3$ ):  $\delta$  = 165.89, 156.05, 151.91, 146.61, 144.92, 138.20, 137.77, 135.87, 135.56, 135.45, 134.50, 131.64, 131.60, 131.54, 130.97, 130.80, 130.79, 129.30, 129.20, 128.15, 127.89, 127.72, 127.58, 127.49, 127.00, 126.97, 126.84, 126.80, 122.39, 35.73, 31.45.; HRMS (ESI) calcd for  $C_{41}H_{33}O_2$   $[M+H]^+$  557.2475, found 557.2481.

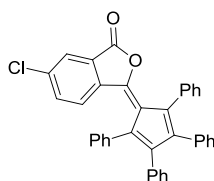

**6-Chloro-3-(2,3,4,5-tetraphenylcyclopenta-2,4-dienylidene)isobenzofuran-1(3H)-one (3e).** 74% yield;  $^1H$  NMR (500 MHz,  $CDCl_3$ ):  $\delta$  = 7.78 (d,  $J$  = 2.0 Hz, 1H), 7.28 – 7.22 (m, 10H), 7.14 – 6.98 (m, 7H), 6.89 – 6.85 (m, 2H), 6.82 (dd,  $J$  = 8.2, 1.4 Hz, 2H), 5.92 (d,  $J$  = 8.7 Hz, 1H);  $^{13}C$  NMR (125 MHz,  $CDCl_3$ ):  $\delta$  = 164.21, 150.46, 147.45, 145.72, 138.10, 137.84, 137.49, 136.25, 135.57, 135.26, 134.52, 134.11, 131.44, 131.32, 130.92, 130.71, 129.50, 129.34, 128.42, 127.99, 127.81, 127.73, 127.65, 127.22, 127.06, 127.01, 125.57; HRMS (ESI) calcd for  $C_{37}H_{24}ClO_2$   $[M+H]^+$  535.1412, found 535.1422.

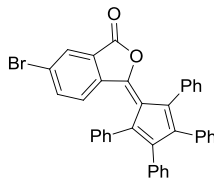

**6-Bromo-3-(2,3,4,5-tetraphenylcyclopenta-2,4-dienylidene)isobenzofuran-1(3H)-one (3f).** 79% yield;  $^1H$  NMR (500 MHz,  $CDCl_3$ ):  $\delta$  = 7.95 (d,  $J$  = 1.5 Hz, 1H), 7.30 – 7.22 (m, 10H), 7.15 – 7.00 (m, 7H), 6.99 – 6.86

(m, 2H), 6.83 – 6.79 (m, 2H), 5.84 (d,  $J = 8.7$  Hz, 1H);  $^{13}\text{C}$  NMR (125 MHz,  $\text{CDCl}_3$ ):  $\delta = 164.08, 150.54, 147.49, 145.76, 137.83, 137.47, 136.92, 136.67, 135.57, 135.26, 134.53, 131.43, 131.34, 130.92, 130.69, 129.51, 129.45, 128.65, 128.49, 127.99, 127.81, 127.75, 127.65, 127.22, 127.07, 127.01, 126.26$ .; HRMS(ESI) calcd for  $\text{C}_{37}\text{H}_{24}\text{BrO}_2$   $[\text{M}+\text{H}]^+$  579.0954, found 579.0962.

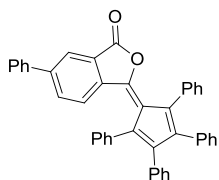

**6-Phenyl-3-(2,3,4,5-tetraphenylcyclopenta-2,4-dienylidene)isobenzofuran-1(3H)-one (3g).** 83% yield;  $^1\text{H}$  NMR (500 MHz,  $\text{CDCl}_3$ ):  $\delta = 8.05$  (d,  $J = 1.4$  Hz, 1H), 7.57 (dd,  $J = 8.2, 1.0$  Hz, 2H), 7.47 (t,  $J = 7.4$  Hz, 2H), 7.42 (m, 1H), 7.37 (dd,  $J = 8.5, 1.6$  Hz, 1H), 7.33 – 7.23 (m, 10H), 7.16 – 6.99 (m, 6H), 6.92 – 6.87 (m, 2H), 6.85 – 6.82 (m, 2H), 6.08 (d,  $J = 8.5$  Hz, 1H);  $^{13}\text{C}$  NMR (125 MHz,  $\text{CDCl}_3$ ):  $\delta = 165.50, 151.60, 150.47, 146.98, 145.28, 144.68, 138.94, 138.11, 137.75, 136.57, 135.82, 135.50, 134.56, 132.59, 131.57, 131.00, 130.80, 129.97, 129.61, 129.39, 129.26, 128.78, 127.95, 127.77, 127.62, 127.57, 127.08, 126.94, 126.90, 123.74$ ; HRMS(ESI) calcd for  $\text{C}_{43}\text{H}_{29}\text{O}_2$   $[\text{M}+\text{H}]^+$  577.2162, found 577.2181.

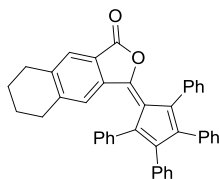

**3-(2,3,4,5-Tetraphenylcyclopenta-2,4-dienylidene)-5,6,7,8-tetrahydronaphtho[2,3-c]furan-1(3H)-one (3h).** 62% yield;  $^1\text{H}$  NMR (500 MHz,  $\text{CDCl}_3$ ):  $\delta = 7.29 - 7.24$  (m, 10H), 7.10 – 7.00 (m, 6H), 6.87–6.79 (m, 5H), 5.86 (d,  $J = 8.5$  Hz, 1H), 3.11 (d,  $J = 5.5$  Hz, 2H), 2.73 (d,  $J = 5.0$  Hz, 2H), 1.79 (d,  $J = 2.4$  Hz, 4H);  $^{13}\text{C}$  NMR (125 MHz,  $\text{CDCl}_3$ ):  $\delta = 165.52, 152.30, 146.41, 144.55, 142.47, 138.95, 138.32, 137.93, 136.26, 136.05, 135.70, 134.83, 134.59, 131.57, 131.53, 131.01, 130.87, 130.84, 129.19, 128.45, 127.87, 127.71, 127.57, 127.28, 126.90, 126.76, 126.71, 125.46, 124.02, 30.01, 25.48, 22.72, 22.42$ ; HRMS(ESI) calcd for  $\text{C}_{41}\text{H}_{31}\text{O}_2$   $[\text{M}+\text{H}]^+$  555.2319, found 555.2320.

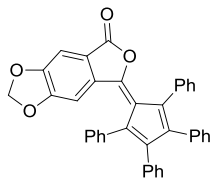

**7-(2,3,4,5-Tetraphenylcyclopenta-2,4-dienylidene)isobenzofuro[5,6-d][1,3]dioxol-5(7H)-one (3i).** 73% yield;  $^1\text{H}$  NMR (500 MHz,  $\text{CDCl}_3$ ):  $\delta$  = 7.27 – 7.20 (m, 11H), 7.09 – 6.97 (m, 7H), 6.85 – 6.83 (m, 2H), 6.80 – 6.78 (m, 2H), 5.99 (s, 2H);  $^{13}\text{C}$  NMR (125 MHz,  $\text{CDCl}_3$ ):  $\delta$  = 164.83, 153.26, 151.62, 151.24, 146.79, 144.88, 138.17, 137.80, 135.81, 135.51, 134.59, 134.20, 131.49, 131.28, 130.96, 130.78, 129.36, 129.05, 127.87, 127.74, 127.59, 127.02, 126.85, 126.81, 122.51, 107.56, 104.33, 103.37; HRMS(ESI) calcd for  $\text{C}_{38}\text{H}_{25}\text{O}_4$   $[\text{M}+\text{H}]^+$  545.1747, found 547.1742.

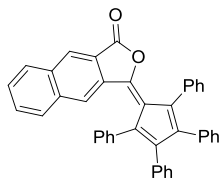

**3-(2,3,4,5-Tetraphenylcyclopenta-2,4-dienylidene)naphtho[2,3-c]furan-1(3H)-one (3j).** 69% yield;  $^1\text{H}$  NMR (500 MHz,  $\text{CDCl}_3$ ):  $\delta$  = 8.88 (d,  $J$  = 8.5 Hz, 1H), 7.79 (d,  $J$  = 8.1 Hz, 1H), 7.69 (t,  $J$  = 7.6 Hz, 1H), 7.62 (t,  $J$  = 7.5 Hz, 1H), 7.51 (d,  $J$  = 8.5 Hz, 1H), 7.35 – 7.20 (m, 10H), 7.17 – 6.98 (m, 6H), 6.89 (d,  $J$  = 7.0 Hz, 2H), 6.83 (d,  $J$  = 7.3 Hz, 2H), 6.24 (d,  $J$  = 8.9 Hz, 1H);  $^{13}\text{C}$  NMR (125 MHz,  $\text{CDCl}_3$ ):  $\delta$  = 165.61, 151.81, 147.21, 145.65, 138.82, 137.97, 137.69, 135.82, 135.43, 134.55, 134.65, 134.13, 131.64, 131.60, 131.54, 131.02, 130.97, 130.80, 129.71, 129.29, 129.24, 128.49, 127.98, 127.81, 127.68, 127.64, 127.47, 127.14, 126.99, 126.91, 124.80, 123.33, 122.07; HRMS (ESI) calcd for  $\text{C}_{41}\text{H}_{27}\text{O}_2$   $[\text{M}+\text{H}]^+$  551.2006, found 551.2009.

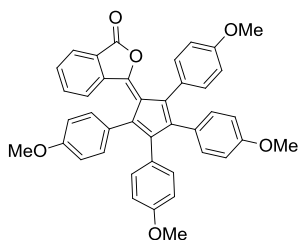

**(Z)-3-(3-(3-methoxyphenyl)-2,4,5-tris(4-methoxyphenyl)cyclopenta-2,4-dienylidene)isobenzofuran-**

**1(3*H*)-one (3k).** 81% yield;  $^1\text{H}$  NMR (500 MHz,  $\text{CDCl}_3$ ):  $\delta = 7.79$  (d,  $J = 7.5$  Hz, 1H), 7.38 (t,  $J = 7.5$  Hz, 1H), 7.16 – 7.11 (m, 5H), 6.81 – 6.75 (m, 6H), 6.70 (d,  $J = 8.7$  Hz, 2H), 6.62 (d,  $J = 8.7$  Hz, 2H), 6.55 (d,  $J = 8.7$  Hz, 2H), 6.17 (d,  $J = 8.2$  Hz, 1H), 3.81 (s, 3H), 3.80 (s, 3H), 3.73 (s, 3H), 3.70 (s, 3H);  $^{13}\text{C}$  NMR (125 MHz,  $\text{CDCl}_3$ ):  $\delta = 165.77, 159.28, 158.59, 158.52, 158.45, 150.64, 146.46, 145.18, 138.27, 133.79, 133.25, 132.53, 132.11, 132.08, 131.14, 130.71, 130.59, 130.22, 128.43, 128.39, 128.08, 126.74, 125.59, 114.81, 113.49, 113.27, 113.14, 55.81, 55.59, 55.50, 55.45$ ; HRMS(ESI) calcd for  $\text{C}_{41}\text{H}_{33}\text{O}_6$   $[\text{M}+\text{H}]^+$  621.2272, found 621.2285.

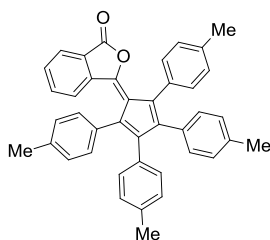

**3-(2,3,4,5-Tetrap-tolylcyclopenta-2,4-dienylidene)isobenzofuran-1(3*H*)-one (3l).** 79% yield;  $^1\text{H}$  NMR (500 MHz,  $\text{CDCl}_3$ ):  $\delta = 7.78$  (d,  $J = 7.6$ , 1H), 7.37 (t,  $J = 7.4$  Hz, 1H), 7.12 – 7.02 (m, 9H), 6.86 (d,  $J = 8.0$  Hz, 2H), 6.80 (d,  $J = 8.0$  Hz, 2H), 6.73 (d,  $J = 8.1$  Hz, 2H), 6.68 (d,  $J = 8.1$  Hz, 2H), 6.08 (d,  $J = 8.2$  Hz, 1H), 2.34 (s, 6H), 2.24 (s, 3H), 2.20 (s, 3H);  $^{13}\text{C}$  NMR (125 MHz,  $\text{CDCl}_3$ ):  $\delta = 165.74, 150.99, 146.92, 145.43, 138.26, 137.01, 136.48, 136.31, 136.03, 135.13, 134.81, 134.05, 133.62, 132.98, 132.65, 131.36, 131.21, 131.17, 130.85, 130.70, 129.95, 128.66, 128.56, 128.46, 128.34, 126.75, 125.52, 21.86, 21.75, 21.72$ ; HRMS(ESI) calcd for  $\text{C}_{41}\text{H}_{33}\text{O}_2$   $[\text{M}+\text{H}]^+$  557.2475, found 557.2483.

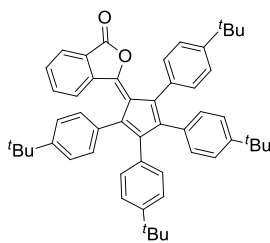

**3-(2,3,4,5-Tetrakis(4-*tert*-butylphenyl)cyclopenta-2,4-dienylidene)isobenzofuran-1(3*H*)-one (3m).** 61% yield;  $^1\text{H}$  NMR (500 MHz,  $\text{CDCl}_3$ ):  $\delta = 7.78$  (d,  $J = 7.6$  Hz, 1H), 7.37 (dd,  $J = 7.5, 2.5$  Hz, 1H), 7.32 – 7.24 (m, 4H), 7.24 – 7.15 (m, 4H), 7.10 – 6.95 (m, 5H), 6.88 – 6.80 (m, 2H), 6.75 – 6.69 (m, 2H), 5.91 (d,  $J = 8.2$  Hz, 1H), 1.35 (s, 9H), 1.35 (s, 9H), 1.25 (s, 9H), 1.22 (s, 9H);  $^{13}\text{C}$  NMR (125 MHz,  $\text{CDCl}_3$ ):  $\delta = 165.71, 150.87,$

150.64, 149.70, 149.43, 149.39, 146.99, 145.80, 138.30, 135.33, 134.84, 133.99, 133.49, 132.98, 132.68, 131.16, 131.05, 130.99, 130.75, 130.51, 130.49, 128.45, 126.77, 126.09, 125.40, 124.59, 124.38, 124.16, 35.04, 34.93, 34.88, 34.80, 31.95, 31.91, 31.75, 31.70; HRMS(ESI) calcd for C<sub>53</sub>H<sub>57</sub>O<sub>2</sub> [M+H]<sup>+</sup> 725.4353, found 725.4363.

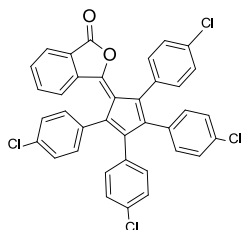

**3-(2,3,4,5-Tetrakis(4-chlorophenyl)cyclopenta-2,4-dienylidene)isobenzofuran-1(3H)-one (3n).** 73% yield; <sup>1</sup>H NMR (500 MHz, CDCl<sub>3</sub>): δ = 7.87 (d, *J* = 7.6 Hz, 1H), 7.50 (t, *J* = 7.4 Hz, 1H), 7.29 – 7.24 (m, 6H), 7.13 – 7.10 (m, 5H), 7.05 (d, *J* = 8.5 Hz, 2H), 6.76 (d, *J* = 8.5 Hz, 2H), 6.70 (d, *J* = 8.5 Hz, 2H), 6.22 (d, *J* = 8.1 Hz, 1H); <sup>13</sup>C NMR (125 MHz, CDCl<sub>3</sub>): δ = 164.91, 152.59, 145.69, 143.99, 137.53, 135.89, 135.55, 134.13, 134.05, 133.62, 133.58, 133.43, 133.24, 133.15, 132.61, 132.41, 132.28, 132.12, 131.91, 130.98, 130.70, 130.63, 129.77, 129.72, 128.64, 128.52, 128.49, 128.37, 128.31, 128.11, 126.94, 126.19; HRMS(ESI) calcd for C<sub>37</sub>H<sub>20</sub>Cl<sub>4</sub>NaO<sub>2</sub> [M+Na]<sup>+</sup> 659.0110, found 659.0121.

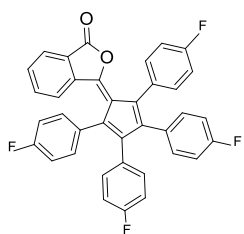

**3-(2,3,4,5-Tetrakis(4-fluorophenyl)cyclopenta-2,4-dienylidene)isobenzofuran-1(3H)-one (3o).** 77% yield; <sup>1</sup>H NMR (500 MHz, CDCl<sub>3</sub>): δ = 7.84 (d, *J* = 7.6 Hz, 1H), 7.46 (t, *J* = 7.5 Hz, 1H), 7.25 – 7.09 (m, 5H), 6.98 – 6.94 (m, 4H), 6.81 – 6.72 (m, 8H), 6.15 (d, *J* = 8.2 Hz, 1H); <sup>13</sup>C NMR (125 MHz, CDCl<sub>3</sub>): δ = 165.13, 163.23, 163.17, 163.04, 161.71, 161.28, 161.19, 161.08, 152.01, 146.03, 144.35, 137.72, 134.09, 133.75, 132.95, 133.56, 133.30, 132.89, 132.41, 132.35, 132.28, 132.00, 131.33, 131.00, 130.70, 129.20, 128.18, 126.92, 126.09, 116.63, 116.46, 115.28, 115.12, 114.95; HRMS(ESI) calcd for C<sub>37</sub>H<sub>20</sub>F<sub>4</sub>O<sub>2</sub> [M+H]<sup>+</sup> 573.1472, found 573.1489.



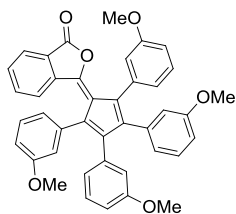

**3-(2,3,4,5-Tetrakis(3-methoxyphenyl)cyclopenta-2,4-dienylidene)isobenzofuran-1(3H)-one (3p).** 74% yield;  $^1\text{H NMR}$  (500 MHz,  $\text{CDCl}_3$ ):  $\delta$  = 7.81 (d,  $J$  = 7.6 Hz, 1H), 7.41 (t,  $J$  = 7.5 Hz, 1H), 7.20 – 7.13 (m, 3H), 6.99 (t,  $J$  = 7.9 Hz, 1H), 6.92 (t,  $J$  = 7.9 Hz, 1H), 6.87 – 6.76 (m, 6H), 6.66 (dd,  $J$  = 8.2, 2.5 Hz, 1H), 6.60 (dd,  $J$  = 8.2, 2.5 Hz, 1H), 6.49 (d,  $J$  = 7.6 Hz, 1H), 6.43 – 6.39 (m, 3H), 6.21 (d,  $J$  = 8.2 Hz, 1H), 3.69 (s, 3H), 3.57 (s, 3H), 3.47 (s, 3H), 3.42 (s, 3H);  $^{13}\text{C NMR}$  (125 MHz,  $\text{CDCl}_3$ ):  $\delta$  = 165.38, 160.48, 159.47, 159.09, 158.94, 151.89, 146.72, 145.01, 139.34, 138.80, 138.05, 137.03, 136.58, 134.33, 133.90, 131.64, 131.42, 130.36, 129.57, 128.91, 128.80, 128.62, 128.57, 126.81, 125.71, 124.04, 123.68, 123.35, 123.31, 116.60, 116.47, 115.56, 115.32, 114.02, 113.99, 113.88, 112.84, 55.73, 55.71, 55.45, 55.40; HRMS(ESI) calcd for  $\text{C}_{41}\text{H}_{33}\text{O}_6$   $[\text{M}+\text{H}]^+$  621.2272, found 621.2286.

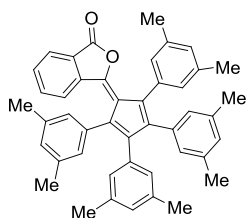

**3-(2,3,4,5-Tetrakis(3,5-dimethylphenyl)cyclopenta-2,4-dienylidene)isobenzofuran-1(3H)-one (3q).** 64% yield;  $^1\text{H NMR}$  (500 MHz,  $\text{CDCl}_3$ ):  $\delta$  = 7.77 (d,  $J$  = 7.6 Hz, 1H), 7.36 (t,  $J$  = 7.4 Hz, 1H), 7.09 (t,  $J$  = 7.8 Hz, 1H), 6.85 – 6.83 (m, 6H), 6.69 (s, 1H), 6.63 (s, 1H), 6.49 (s, 2H), 6.43 (s, 2H), 6.07 (d,  $J$  = 8.2 Hz, 1H), 2.23 (s, 6H), 2.13 (s, 6H), 2.06 (s, 6H), 2.01 (s, 6H);  $^{13}\text{C NMR}$  (125 MHz,  $\text{CDCl}_3$ ):  $\delta$  = 165.78, 150.72, 147.28, 145.57, 138.47, 138.41, 138.03, 137.61, 136.66, 136.42, 136.22, 135.79, 135.38, 134.27, 133.50, 131.21, 130.98, 130.94, 129.36, 128.84, 128.82, 128.72, 128.68, 128.43, 128.29, 126.78, 125.34, 21.85, 21.68, 21.65, 21.62; HRMS(ESI) calcd for  $\text{C}_{45}\text{H}_{41}\text{O}_2$   $[\text{M}+\text{H}]^+$  613.3101, found 613.3115.

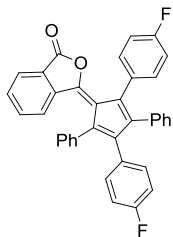

**3-(2,4-Bis(4-fluorophenyl)-3,5-diphenylcyclopenta-2,4-dienylidene)isobenzofuran-1(3H)-one (3r)** 81% yield, regioisomer ratio = 5:3;  $^1\text{H}$  NMR (500 MHz,  $\text{CDCl}_3$ ):  $\delta$  = 7.87 – 7.83 (m, 4H), 7.49 – 7.42 (m, 5H), 7.31 – 7.18 (m, 31H), 7.13 – 7.02 (m, 27H), 6.99 – 6.95 (m, 15H), 6.86 – 6.76 (m, 20H), 6.71 (t,  $J$  = 8.8 Hz, 2H), 6.20 (d,  $J$  = 8.2 Hz, 3H), 6.07 (d,  $J$  = 8.2 Hz, 1H);  $^{13}\text{C}$  NMR (125 MHz,  $\text{CDCl}_3$ ):  $\delta$  = 164.76, 163.09, 162.66, 161.12, 151.14, 146.97, 145.26, 137.34, 135.00, 134.64, 133.49, 133.06, 133.04, 133.01, 132.50, 132.43, 131.98, 131.92, 131.90, 131.81, 131.29, 130.92, 130.36, 130.16, 129.90, 129.18, 128.97, 127.93, 127.68, 127.59, 127.51, 127.41, 127.34, 127.25, 126.78, 126.62, 126.38, 125.49, 125.31, 115.94, 115.77, 114.60, 114.43, 104.97; HRMS(ESI) calcd for  $\text{C}_{37}\text{H}_{23}\text{F}_2\text{O}_4$   $[\text{M}+\text{H}]^+$  537.1661, found 537.1672.

$^1\text{H}$  NMR (500 MHz,  $\text{CDCl}_3$ ):  $\delta$  = 7.84 – 7.82 (m, 3H), 7.48 – 7.42 (m, 3H), 7.33 – 7.19 (m, 31H), 7.15 – 7.03 (m, 10H), 6.99 – 6.84 (m, 5H), 6.82 – 6.69 (m, 24H), 6.20 (d,  $J$  = 8.0 Hz, 1H), 6.07 (d,  $J$  = 8.0 Hz, 3H);  $^{13}\text{C}$  NMR (125 MHz,  $\text{CDCl}_3$ ):  $\delta$  = 165.32, 165.28, 165.22, 163.16, 163.08, 162.96, 161.62, 161.21, 161.12, 161.01, 152.01, 151.87, 151.79, 147.29, 145.83, 145.63, 145.56, 144.15, 143.92, 137.91, 137.82, 137.45, 135.51, 134.82, 133.97, 133.93, 133.53, 132.99, 132.94, 132.48, 132.41, 132.39, 132.36, 132.35, 131.81, 131.78, 131.69, 131.67, 131.43, 130.88, 130.86, 130.69, 129.48, 128.43, 128.18, 128.08, 128.02, 127.85, 127.72, 127.35, 127.18, 127.09, 127.07, 126.89, 125.97, 125.79, 116.45, 116.28, 115.09, 114.99, 114.93, 114.84, 114.83, 114.77, 114.68; HRMS(ESI) calcd for  $\text{C}_{37}\text{H}_{23}\text{F}_2\text{O}_4$   $[\text{M}+\text{H}]^+$  537.1661, found 537.1672.

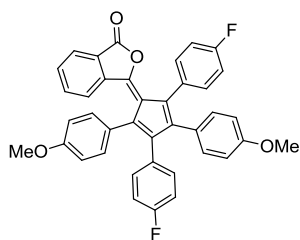

**3-(2,4-bis(4-fluorophenyl)-3,5-bis(4-methoxyphenyl)cyclopenta-2,4-dienylidene)isobenzofuran-1(3H)-one**

(3s). 70% yield, regioselectivity ratio = 3:2;  $^1\text{H}$  NMR (500 MHz,  $\text{CDCl}_3$ )  $\delta$  = 7.84 (t,  $J$  = 7.0 Hz, 6.4, 1H), 7.46 – 7.42 (m, 1H), 7.23 – 7.12 (m, 7H), 7.00 – 6.96 (m, 3H), 6.85 – 6.58 (m, 15H), 6.22 – 6.17 (m, 1H), 3.83 (s, 3H), 3.75 (s, 2H), 3.72 (s, 2H);  $^{13}\text{C}$  NMR (125 MHz,  $\text{CDCl}_3$ ):  $\delta$  = 165.45, 165.44, 165.38, 163.50, 163.06, 162.97, 162.85, 161.50, 161.12, 161.01, 160.89, 159.50, 158.84, 158.81, 158.70, 158.67, 151.27, 151.26, 150.77, 147.17, 146.99, 145.49, 145.24, 144.27, 137.98, 137.94, 137.88, 134.17, 133.98, 133.88, 133.80, 133.03, 132.97, 132.77, 132.56, 132.53, 132.47, 132.41, 132.39, 132.01, 131.97, 131.94, 131.90, 131.72, 131.61, 131.54, 131.49, 129.95, 129.91, 129.63, 128.43, 128.13, 128.03, 127.80, 127.70, 127.48, 127.44, 126.84, 126.76, 126.73, 125.89, 125.87, 125.75, 116.41, 116.24, 115.07, 114.99, 114.84, 114.81, 114.67, 113.56, 113.44, 113.39, 113.29, 113.24, 55.79, 55.55, 55.49, 55.44. HRMS (ESI) calcd for  $\text{C}_{39}\text{H}_{27}\text{F}_2\text{O}_4$   $[\text{M}+\text{H}]^+$  597.1872, found 597.1902.

$^1\text{H}$  NMR (500 MHz,  $\text{CDCl}_3$ ):  $\delta$  = 7.81 (d,  $J$  = 7.6 Hz, 1H), 7.43 – 7.39 (m, 1H), 7.18 – 7.15 (m, 1H), 7.11 – 7.08 (m, 4H), 6.80 – 6.71 (m, 12H), 6.18 (d,  $J$  = 8.2 Hz, 1H), 3.81 (s, 3H), 3.80 (s, 3H);  $^{13}\text{C}$  NMR (125 MHz,  $\text{CDCl}_3$ ):  $\delta$  = 165.53, 159.50, 158.73, 151.79, 145.31, 144.07, 138.08, 134.21, 133.97, 132.42, 132.37, 131.98, 131.57, 129.97, 129.66, 128.55, 126.85, 125.75, 115.08, 114.93, 114.91, 114.76, 113.58, 55.82, 55.59; HRMS(ESI) calcd for  $\text{C}_{39}\text{H}_{27}\text{F}_2\text{O}_4$   $[\text{M}+\text{H}]^+$  597.1872, found 597.1902.

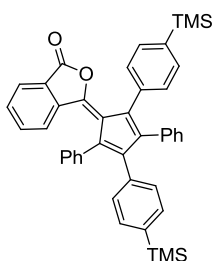

**3-(2,4-diphenyl-3,5-bis(4-(trimethylsilyl)phenyl)cyclopenta-2,4-dienylidene)isobenzofuran-1(3H)-one (3t)**

87% yield, regioisomer ratio = 2:1;  $^1\text{H}$  NMR (500 MHz,  $\text{CDCl}_3$ ):  $\delta$  = 7.80 (d,  $J$  = 7.6 Hz, 1H), 7.40 (t,  $J$  = 7.9 Hz, 5H), 7.29 – 7.21 (m, 4H), 7.12 – 7.00 (m, 7H), 6.91 – 6.90 (m, 2H), 6.82 (d,  $J$  = 7.1 Hz, 2H), 5.91 (d,  $J$  = 8.2 Hz, 1H), 0.29 (s, 18H);  $^{13}\text{C}$  NMR (125 MHz,  $\text{CDCl}_3$ ):  $\delta$  = 165.41, 151.71, 146.81, 145.40, 139.62, 138.41, 138.32, 138.08, 137.96, 135.82, 135.50, 134.61, 134.22, 133.57, 132.86, 131.67, 131.43, 130.83, 130.26, 128.52, 127.78, 127.59, 127.06, 126.88, 125.58, -0.51, -0.55; HRMS(ESI) calcd for  $\text{C}_{43}\text{H}_{41}\text{O}_2\text{Si}_2$   $[\text{M}+\text{H}]^+$

645.2640, found 645.2656.

$^1\text{H}$  NMR (500 MHz,  $\text{CDCl}_3$ ):  $\delta$  = 7.82 (d,  $J$  = 7.6 Hz, 1H), 7.41 (t,  $J$  = 7.5 Hz, 1H), 7.27 – 7.20 (m, 10H), 7.21 (d,  $J$  = 7.9 Hz, 2H), 7.13 (d,  $J$  = 7.8 Hz, 3H), 6.84 (d,  $J$  = 7.8 Hz, 2H), 6.78 (d,  $J$  = 7.8 Hz, 2H), 6.07 (d,  $J$  = 8.2 Hz, 1H), 0.22 (s, 9H), 0.19 (s, 9H);  $^{13}\text{C}$  NMR (125 MHz,  $\text{CDCl}_3$ ):  $\delta$  = 165.46, 151.52, 147.19, 145.40, 138.93, 138.71, 138.14, 138.09, 137.73, 136.09, 135.72, 134.52, 133.82, 132.59, 132.46, 131.55, 131.47, 131.41, 131.02, 130.30, 129.98, 129.94, 129.30, 128.41, 127.93, 127.47, 126.86, 126.81, 125.68, -0.66, -0.68; HRMS(ESI) calcd for  $\text{C}_{43}\text{H}_{41}\text{O}_2\text{Si}_2$   $[\text{M}+\text{H}]^+$  645.2640, found 645.2656.

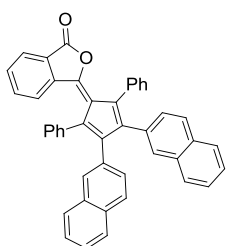

**3-(3,4-Di(naphthalen-2-yl)-2,5-diphenylcyclopenta-2,4-dienylidene)isobenzofuran-1(3H)-one (3u).** 76% yield, regioselectivity ratio > 19:1;  $^1\text{H}$  NMR (500 MHz,  $\text{CDCl}_3$ ):  $\delta$  = 7.85 (d,  $J$  = 1.5 Hz, 1H), 7.70 (d,  $J$  = 8.1 Hz, 1H), 7.65 (d,  $J$  = 8.2 Hz, 1H), 7.51 – 7.21 (m, 21H), 7.14 (t,  $J$  = 7.5, 1H), 7.01 (dd,  $J$  = 8.5, 1.5 Hz, 1H), 6.97 – 6.95 (m, 1H), 6.11 (d,  $J$  = 8.2 Hz, 1H);  $^{13}\text{C}$  NMR (125 MHz,  $\text{CDCl}_3$ ):  $\delta$  = 165.43, 151.87, 146.70, 144.98, 138.06, 138.04, 137.65, 135.20, 133.90, 133.39, 133.21, 133.17, 133.03, 132.54, 132.45, 132.16, 131.56, 131.00, 130.22, 130.15, 130.11, 129.44, 128.76, 128.74, 128.52, 128.08, 127.95, 127.87, 127.61, 127.18, 126.99, 126.97, 126.87, 126.24, 126.13, 126.10, 125.96, 125.76; HRMS(ESI) calcd for  $\text{C}_{45}\text{H}_{29}\text{O}_2$   $[\text{M}+\text{H}]^+$  601.2162, found 601.2175.

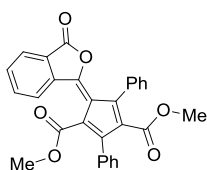

**Diethyl 4-(3-oxoisobenzofuran-1(3H)-ylidene)-3,5-diphenylcyclopenta-2,5-diene-1,2-dicarboxylate (3v).** 69% yield, regioisomer ratio > 19:1;  $^1\text{H}$  NMR (500 MHz,  $\text{CDCl}_3$ ):  $\delta$  = 7.97 (dd,  $J$  = 5.6, 3.1 Hz, 2H), 7.79 (dd,  $J$

= 5.7, 3.1 Hz, 2H), 7.45 – 7.39 (m, 5H), 7.15 – 7.10 (m, 3H), 7.05 (dd,  $J = 8.1, 1.4$  Hz, 2H), 3.40 (s, 3H), 3.34 (s, 3H);  $^{13}\text{C}$  NMR (125 MHz,  $\text{CDCl}_3$ ):  $\delta = 195.04, 164.45, 163.26, 160.01, 153.57, 143.92, 141.19, 136.25, 133.95, 132.70, 132.31, 129.43, 129.11, 128.87, 128.71, 128.31, 128.04, 124.52, 52.21, 52.01$ ; HRMS(ESI) calcd for  $\text{C}_{29}\text{H}_{21}\text{O}_6$   $[\text{M}+\text{H}]^+$  465.1333, found 465.1339.

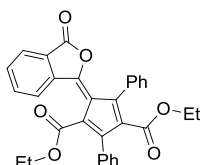

**Diethyl 4-(3-oxoisobenzofuran-1(3H)-ylidene)-3,5-diphenylcyclopenta-2,5-diene-1,2-dicarboxylate (3w).**

73% yield, regioisomer ratio > 19:1;  $^1\text{H}$  NMR (500 MHz,  $\text{CDCl}_3$ ):  $\delta = 7.97$  (d,  $J = 5.7, 3.1$  Hz, 2H), 7.78 (dd,  $J = 5.7, 3.0$  Hz, 2H), 7.47 – 7.45 (m, 2H), 7.40 – 7.32 (m, 3H), 7.15 – 7.10 (m, 3H), 7.08 – 7.06 (m, 2H), 3.88 (q,  $J = 7.1$  Hz, 2H), 3.80 (q,  $J = 7.1$  Hz, 2H), 0.77 (t,  $J = 7.1$  Hz, 3H), 0.66 (t,  $J = 7.1$  Hz, 3H);  $^{13}\text{C}$  NMR (125 MHz,  $\text{CDCl}_3$ ):  $\delta = 195.16, 163.77, 162.42, 160.33, 153.56, 144.00, 141.34, 136.19, 134.21, 132.89, 132.45, 130.82, 129.70, 129.32, 129.29, 128.92, 128.89, 128.59, 128.39, 127.91, 127.87, 124.45, 61.26, 60.97, 13.82, 13.51$ ; HRMS(ESI) calcd for  $\text{C}_{31}\text{H}_{25}\text{O}_6$   $[\text{M}+\text{H}]^+$  493.1646, found 493.1650.

**Synthetic transformations of 3a**

**Compound 4**

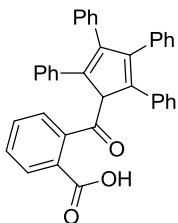

**2-(2,3,4,5-Tetraphenylcyclopenta-2,4-dienecarbonyl)benzoic acid (4).** 95% yield;  $^1\text{H}$  NMR (500 MHz,  $\text{CDCl}_3$ ):  $\delta = 10.72$  (broad s, 1H), 7.70 (d,  $J = 7.4$  Hz, 1H), 7.43 (d,  $J = 7.7$  Hz, 2H), 7.32 – 7.29 (m, 2H), 7.19 – 7.04 (m, 13H), 6.96 – 6.91 (m, 6H), 5.55 (s, 1H);  $^{13}\text{C}$  NMR (125 MHz,  $\text{CDCl}_3$ ):  $\delta = 191.93, 171.95, 158.80, 154.09, 145.41, 144.53, 144.14, 137.53, 135.32, 134.94, 134.57, 132.33, 130.70, 130.45, 129.68, 129.57, 128.91,$

128.83, 128.62, 128.42, 128.28, 128.11, 128.05, 128.00, 127.94, 127.60, 127.55, 127.48, 127.04, 60.74;  
HRMS(ESI) calcd for  $C_{37}H_{27}O_3$   $[M+H]^+$  519.1926, found 519.1941.

### Compound 5

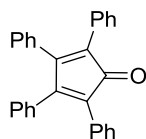

**2,3,4,5-Tetraphenylcyclopenta-2,4-dienone (5).** 67% yield;  $^1H$  NMR (500 MHz,  $CDCl_3$ ):  $\delta$  = 7.26 – 7.22 (m, 11H), 7.18 (t,  $J$  = 7.6 Hz, 4H), 6.93 (d,  $J$  = 7.6 Hz, 4H), 6.85 (s, 1H);  $^{13}C$  NMR (125 MHz,  $CDCl_3$ ):  $\delta$  = 200.82, 154.97, 133.57, 131.90, 131.24, 130.88, 130.63, 129.81, 128.97, 128.85, 128.82, 128.50, 128.46, 127.93, 127.05, 126.34, 125.81; HRMS(ESI) calcd for  $C_{29}H_{21}O$   $[M+H]^+$  385.1587, found 385.1592.

### Compound 6

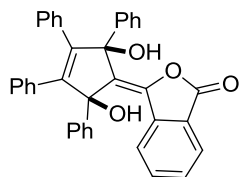

**(Z)-3-((2R,5S)-2,5-dihydroxy-2,3,4,5-tetraphenylcyclopent-3-enylidene)isobenzofuran-1(3H)-one (6).** 51% yield;  $^1H$  NMR (500 MHz,  $CDCl_3$ ):  $\delta$  = 7.83 (d,  $J$  = 7.6 Hz, 1H), 7.79 (d,  $J$  = 7.7 Hz, 1H), 7.67 (t,  $J$  = 7.5 Hz, 1H), 7.58 – 7.55 (m, 3H), 7.29 – 7.20 (m, 4H), 7.17 – 7.12 (m, 4H), 7.08 – 7.04 (m, 3H), 6.99 – 6.97 (m, 2H), 6.88 (s, 5H);  $^{13}C$  NMR (125 MHz,  $CDCl_3$ ):  $\delta$  = 165.81, 148.09, 145.49, 142.58, 142.41, 140.32, 137.05, 134.53, 134.42, 134.05, 133.42, 130.69, 130.53, 130.04, 128.30, 128.06, 127.86, 127.73, 127.69, 127.64, 127.54, 127.01, 126.98, 125.14, 124.68, 87.32, 86.21; HRMS(ESI) calcd for  $C_{37}H_{27}O_4$   $[M+H]^-$  535.1904, found 535.1912.

### Compound 7

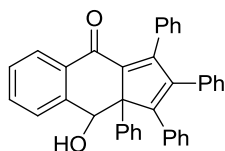

**4-Hydroxy-1,2,3,3a-tetraphenyl-3aH-cyclopenta[b]naphthalen-9(4H)-one (7).** 56% yield;  $^1\text{H}$  NMR (500 MHz,  $\text{CDCl}_3$ ):  $\delta = 7.83$  (d,  $J = 7.6$  Hz, 1H), 7.79 (d,  $J = 7.7$  Hz, 1H), 7.67 (t,  $J = 7.5$  Hz, 1H), 7.58 – 7.55(m, 3H), 7.29 – 7.20 (m, 4H), 7.17 – 7.12 (m, 4H), 7.08 – 7.04 (m, 3H), 6.99 – 6.97 (m, 2H), 6.88 (s, 5H);  $^{13}\text{C}$  NMR (125 MHz,  $\text{CDCl}_3$ ):  $\delta = 165.81, 148.09, 145.49, 142.58, 142.41, 140.32, 137.05, 134.53, 134.42, 134.05, 133.42, 130.69, 130.53, 130.04, 128.30, 128.06, 127.86, 127.73, 127.69, 127.64, 127.54, 127.01, 126.98, 125.14, 124.68, 87.32, 86.21$ ; HRMS(ESI) calcd for  $\text{C}_{37}\text{H}_{27}\text{O}_2$   $[\text{M}+\text{H}]^+$  503.2006, found 503.2002.

### Compound 8

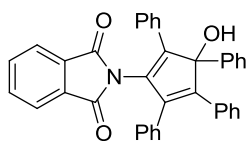

**2-(3-Hydroxy-2,3,4,5-tetraphenylcyclopenta-1,4-dienyl)isoindoline-1,3-dione (8).** 62% yield;  $^1\text{H}$  NMR (500 MHz,  $\text{CDCl}_3$ ):  $\delta = 7.79 - 7.73$  (m, 4H), 7.68 – 7.62 (m, 2H), 7.35 – 7.32 (m, 2H), 7.22 – 7.16 (m, 8H), 7.12 – 7.03 (m, 7H), 3.16 (s, 1H), 3.16 (s, 1H);  $^{13}\text{C}$  NMR (125 MHz,  $\text{CDCl}_3$ ):  $\delta = 168.07, 167.51, 152.10, 148.18, 139.67, 138.68, 134.74, 134.71, 134.13, 133.46, 132.23, 132.15, 132.03, 131.19, 129.60, 129.16, 129.12, 129.07, 128.70, 128.67, 128.33, 128.24, 127.80, 127.73, 125.80, 124.26, 124.17, 89.35$ ; HRMS(ESI) calcd for  $\text{C}_{37}\text{H}_{25}\text{NNaO}_3$   $[\text{M}+\text{Na}]^+$  554.1727, found 554.1726.

### 8. Reference

- 1) Sartori, G., Bigi, F., Canali, G., Maggi, R., Casnati, G., Tao, X. C., *J. Org. Chem.*, **1993**, 58, 840.
- 2) Park, K., Bae, G., Moon, J., Choe, J., Song, K. H., Lee, S. W., *J. Org. Chem.*, **2010**, 75, 6244.
- 3) Jiang, Y., Chen, X., Zheng, Y. S., Xue, Z. Y., Shu, C., Yuan, W. C., Zhang, X. M., *Angew. Chem. Int. Ed.* **2011**, 50, 7304.
- 4) Bele, C., Darabantu, M., *Heterocycl. commun.*, **2003**, 39, 641.
- 5) Mitsuaki, W., Hitoshi, M., Maya, T., Umeka, I., *Synthesis*, **1994**, 1083.
- 6) Dora, E. K., Dash, B., Panda, C. S., *Indian J. Chem., Sect B*, **1985**, 24, 196.

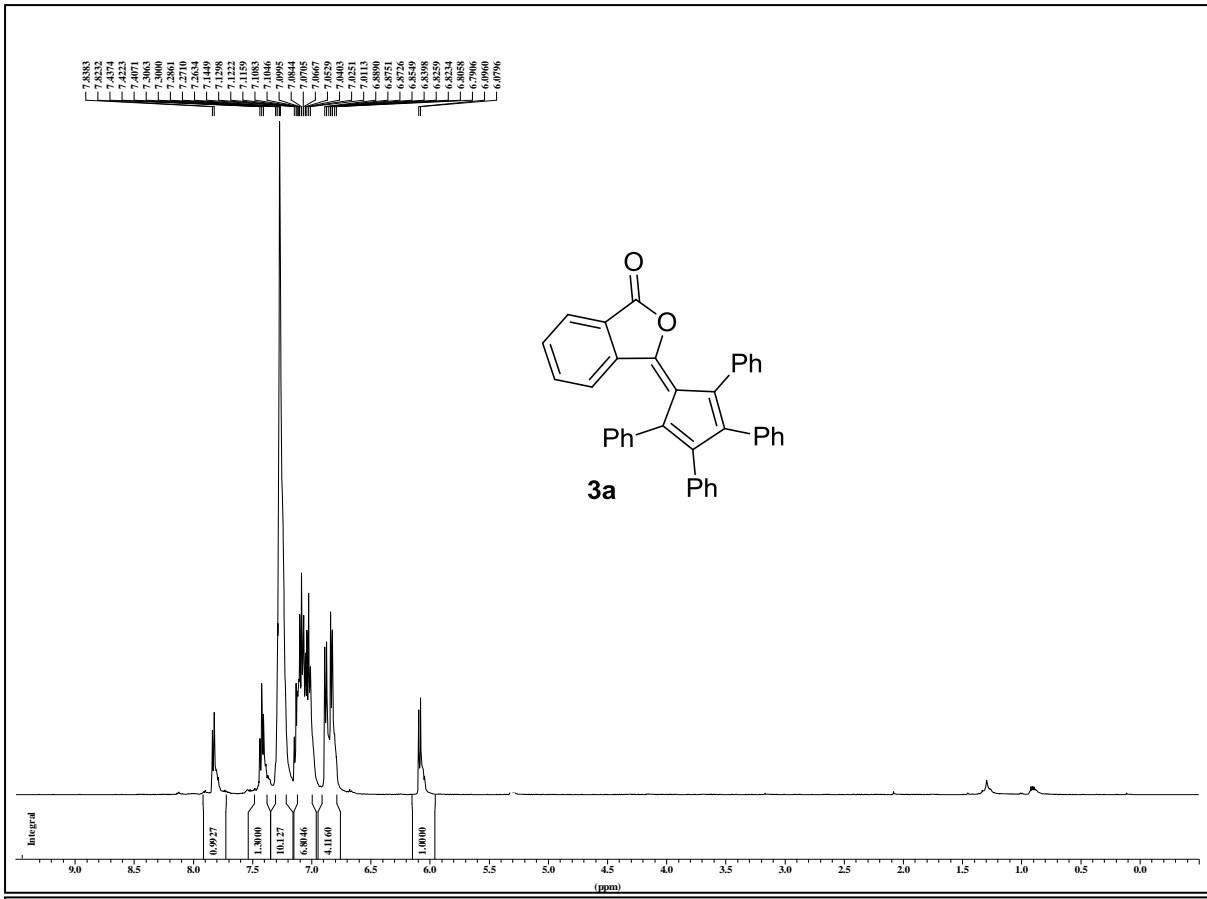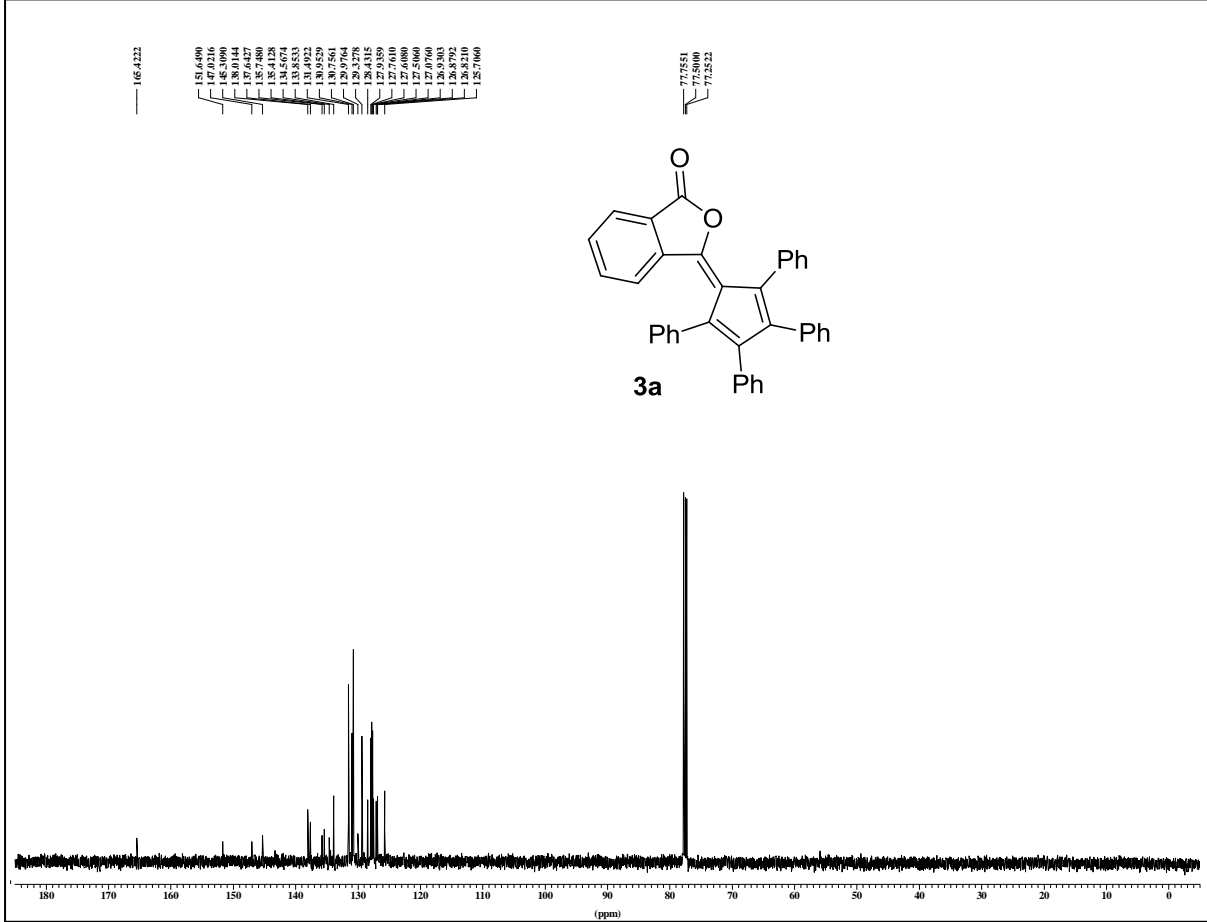



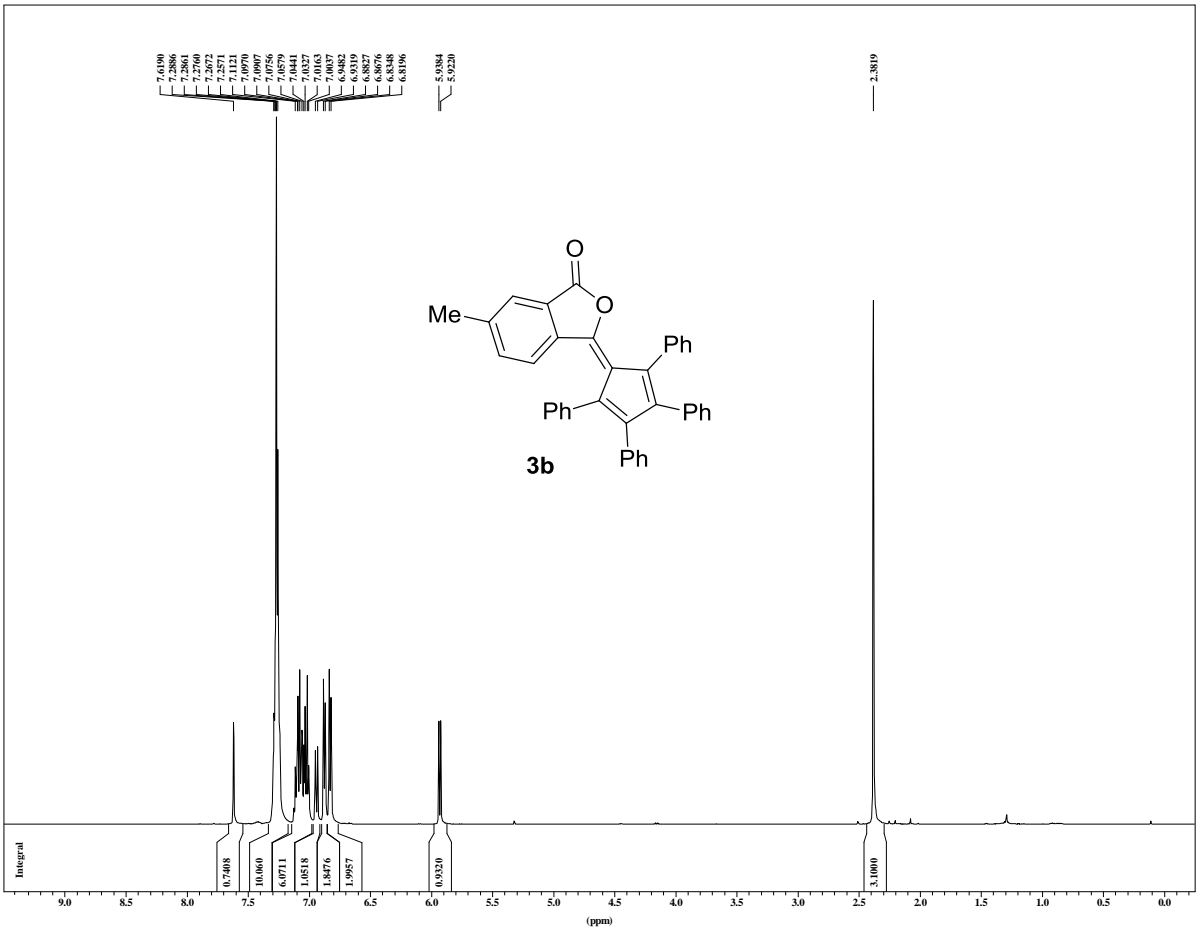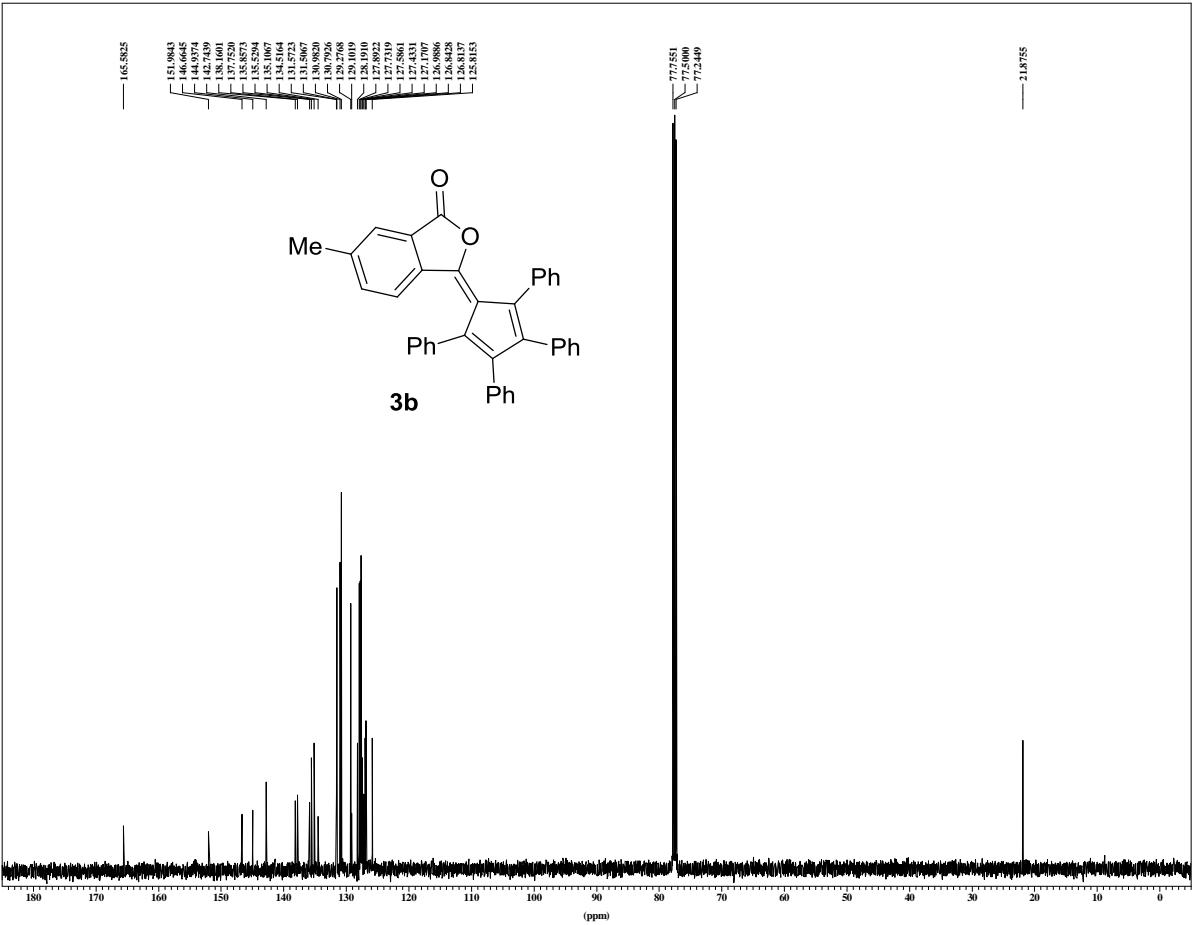

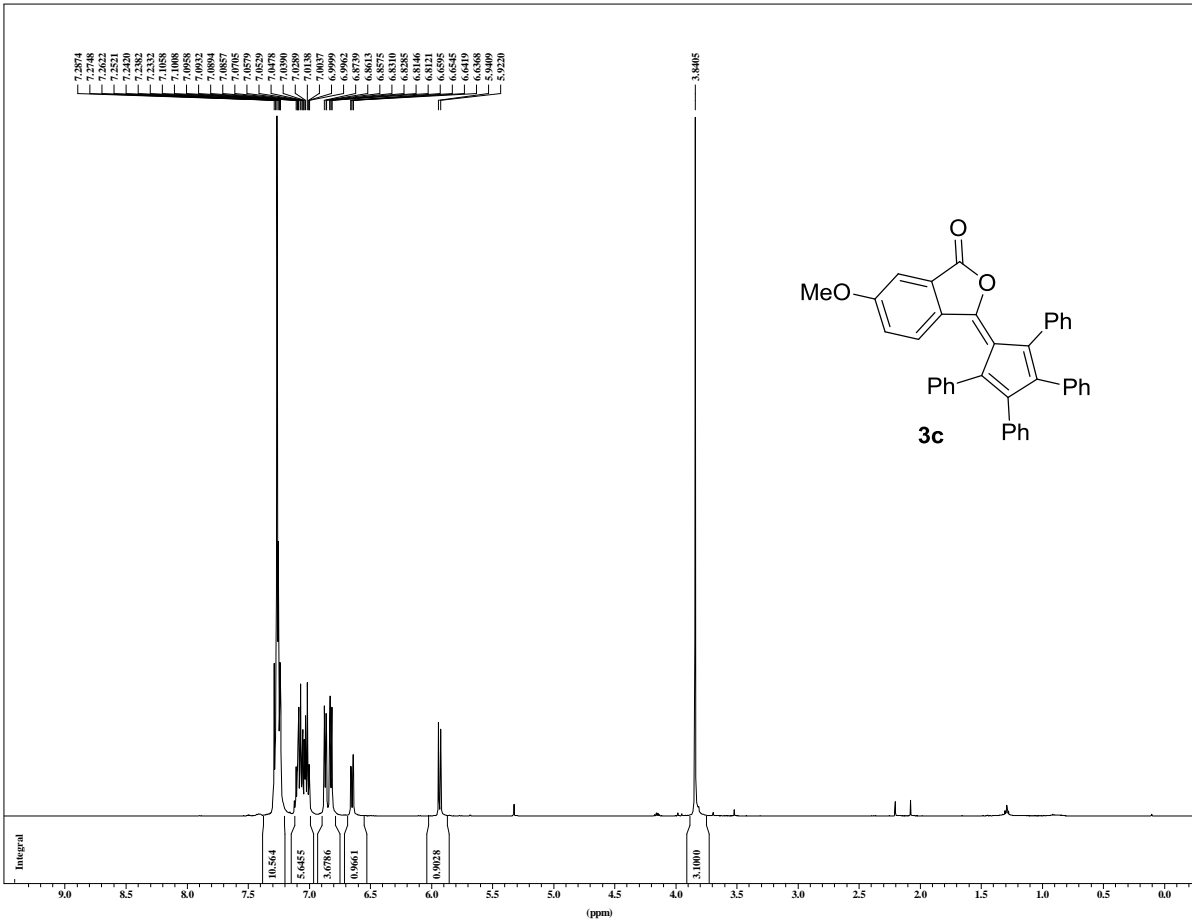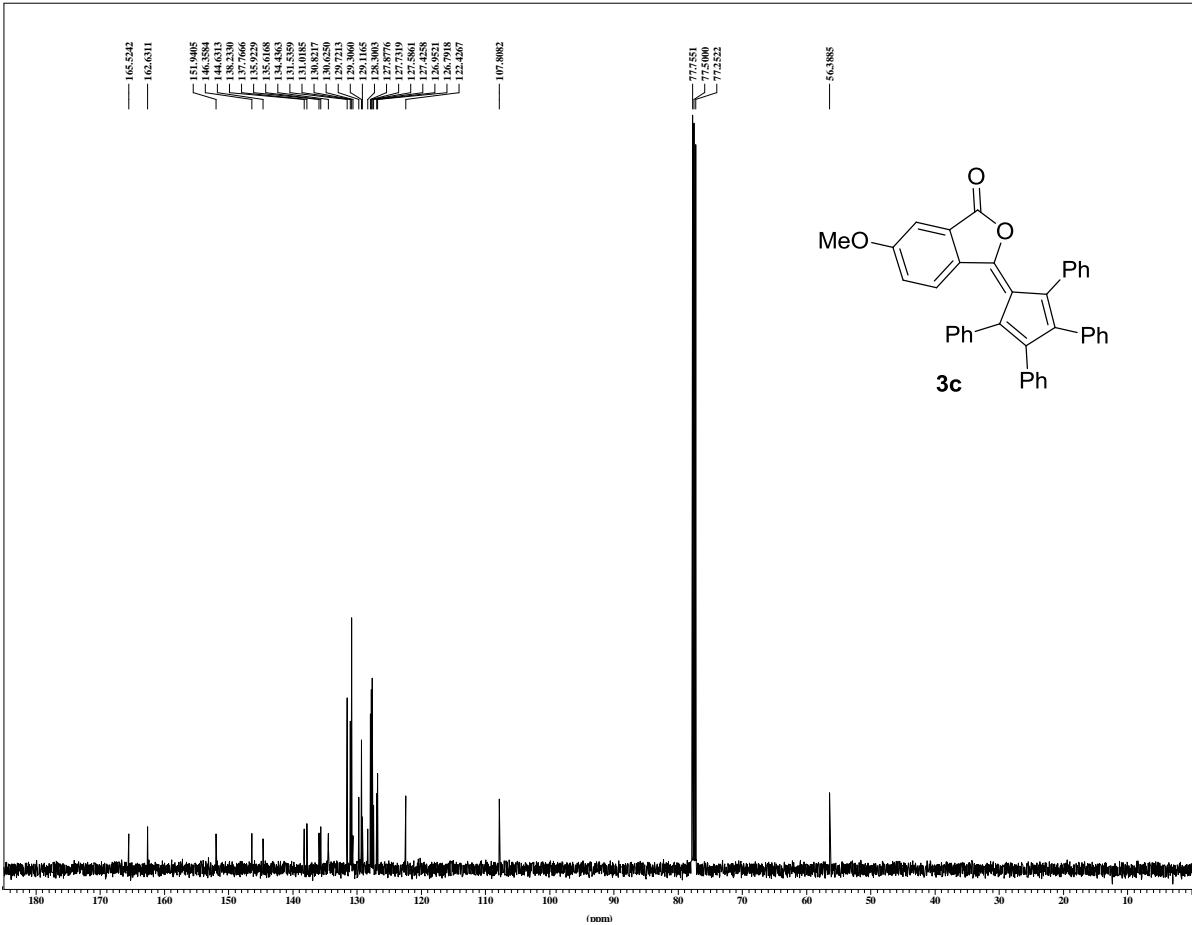

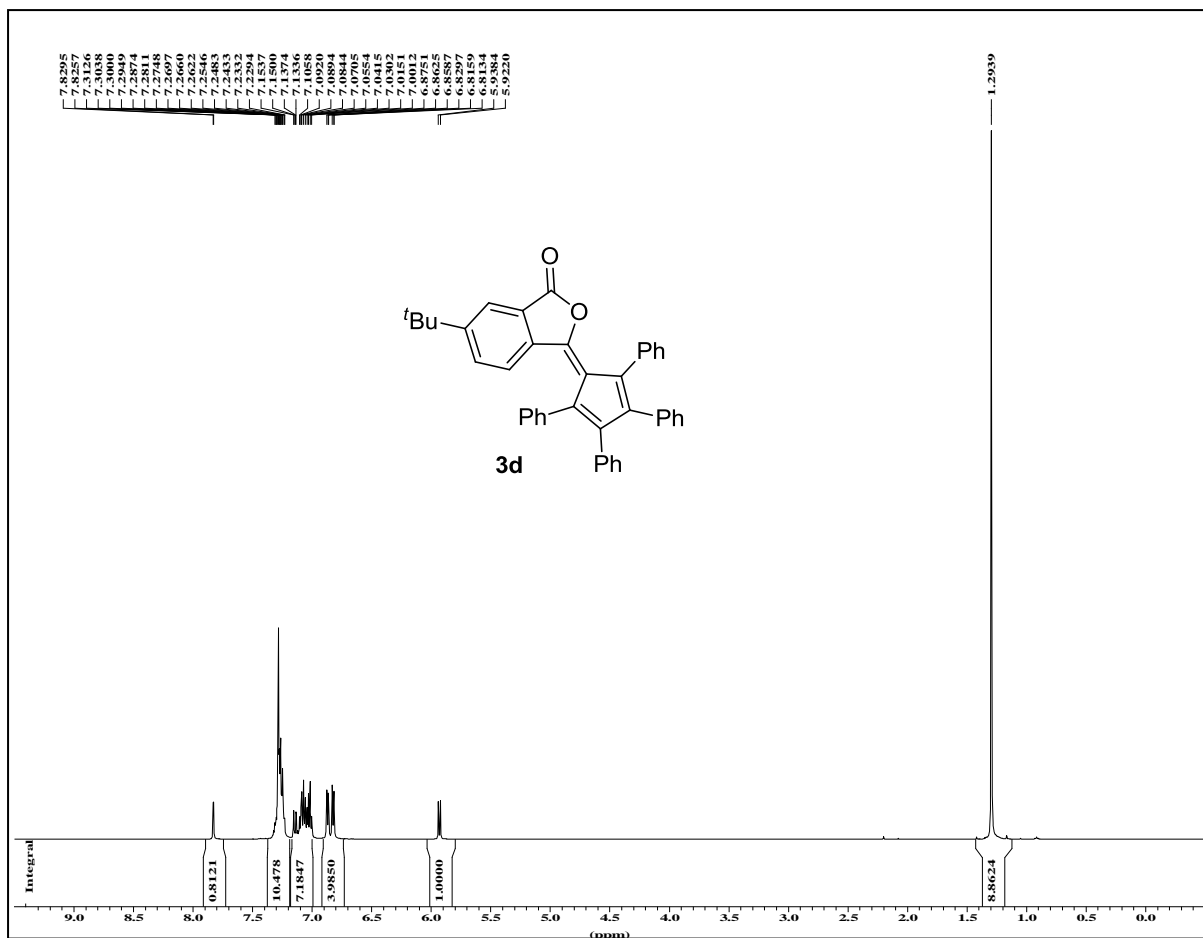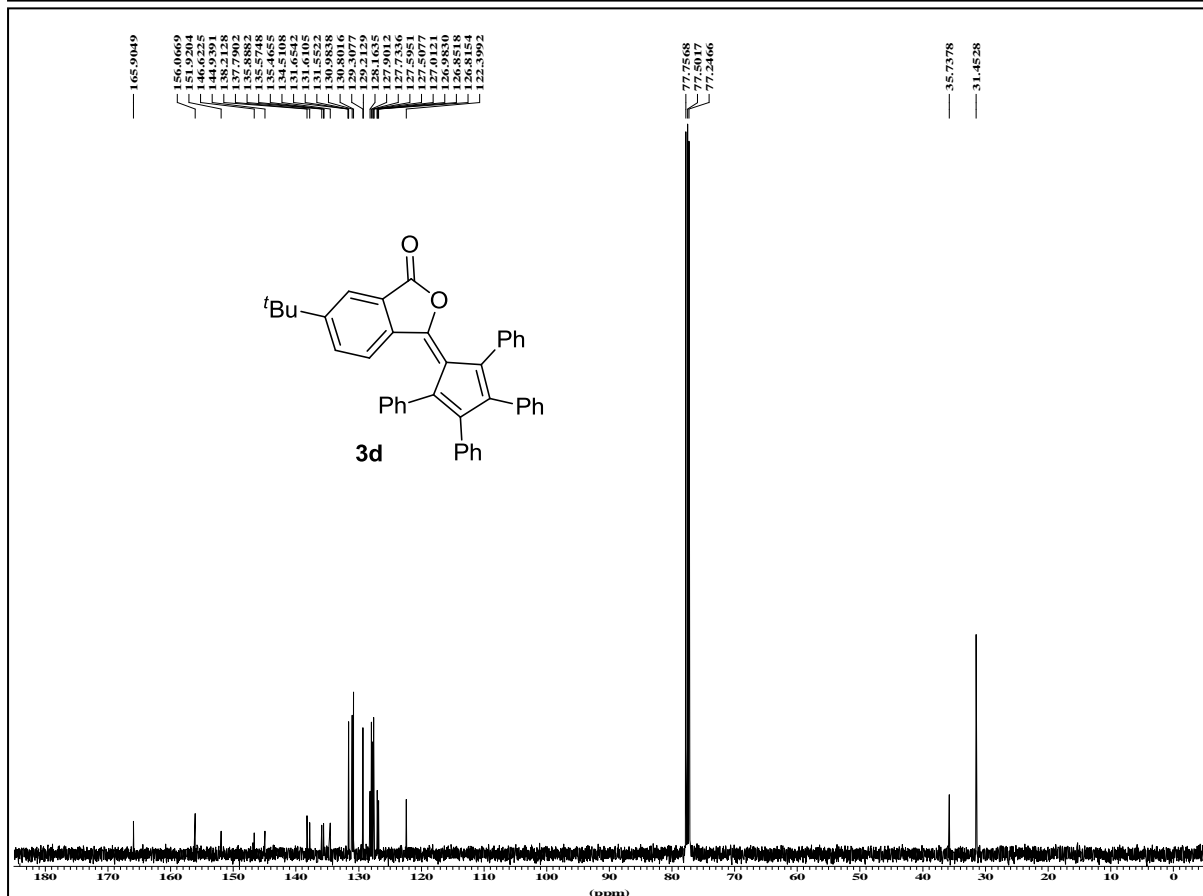

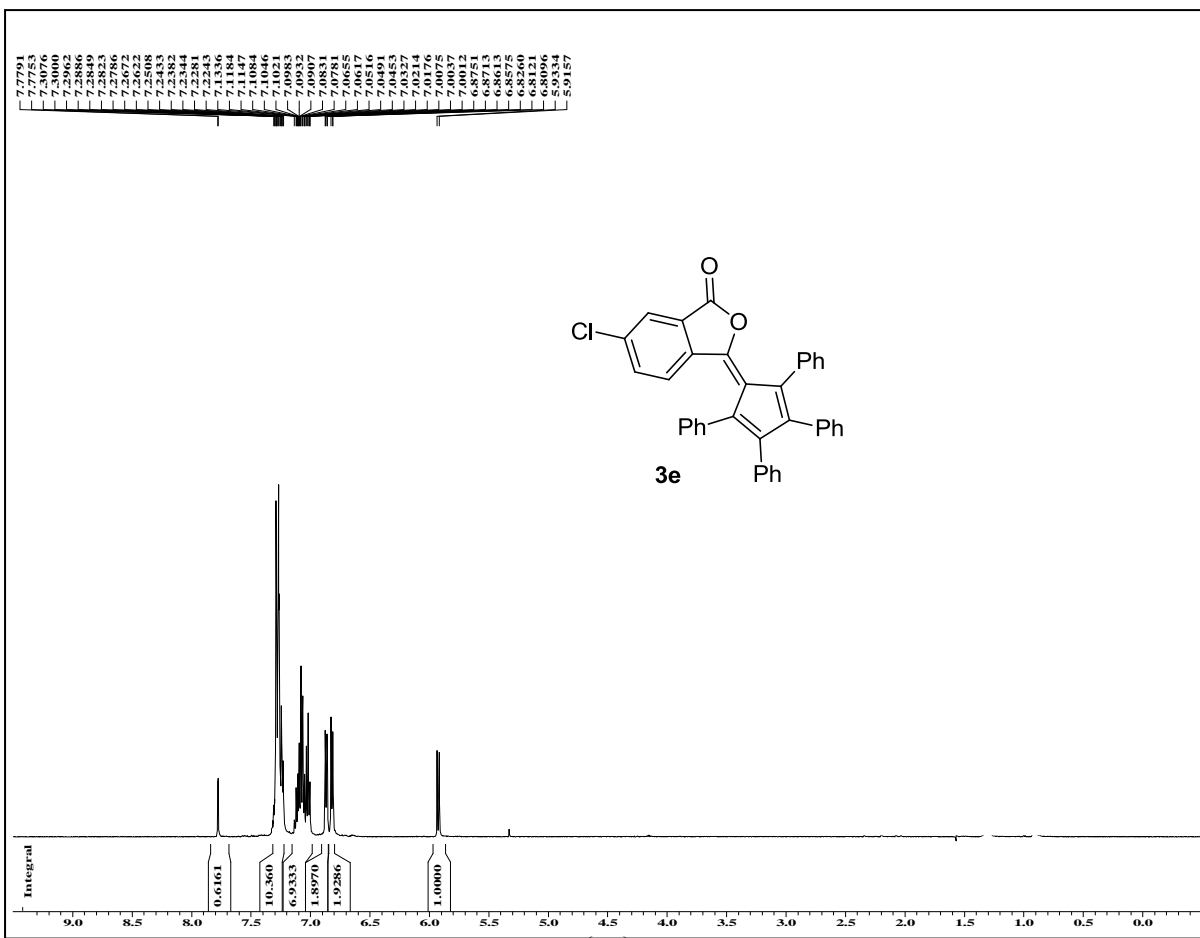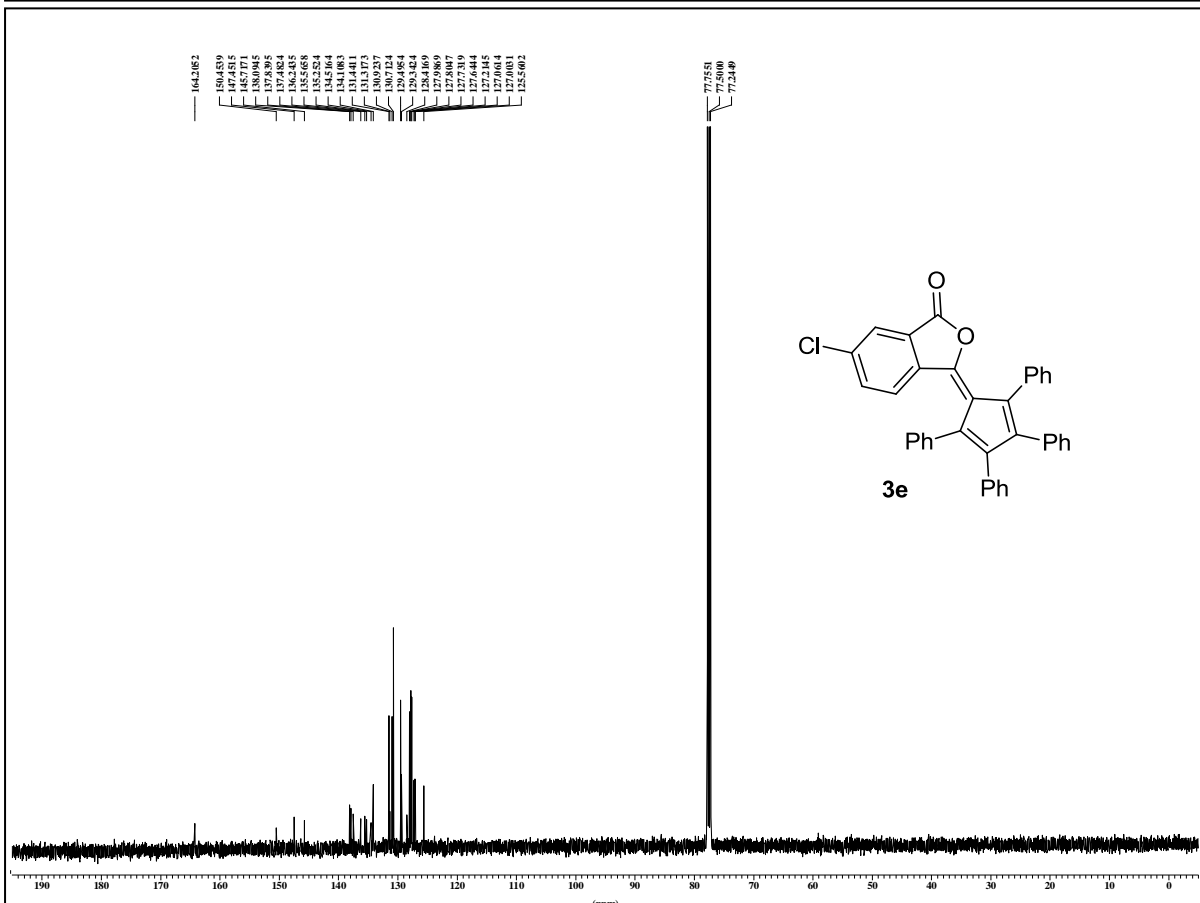

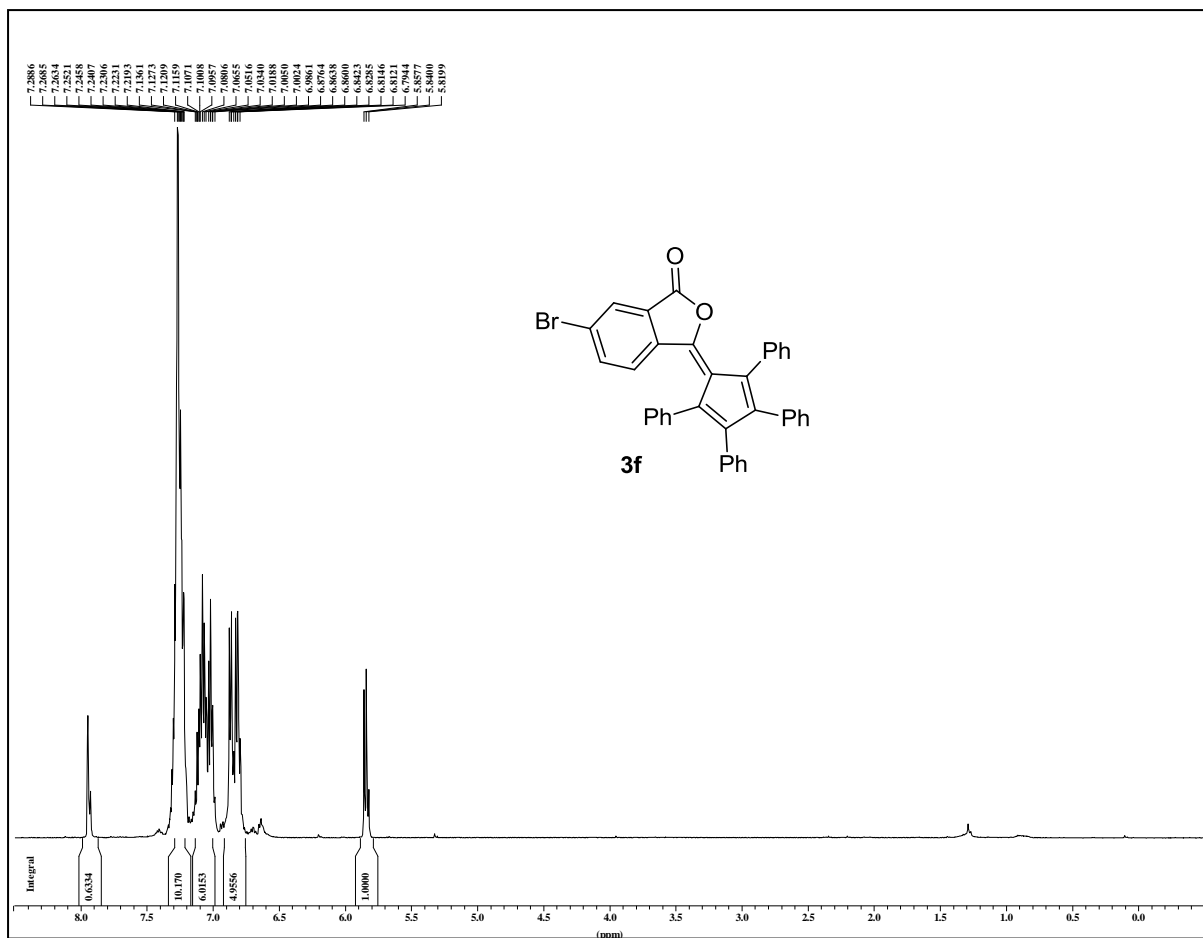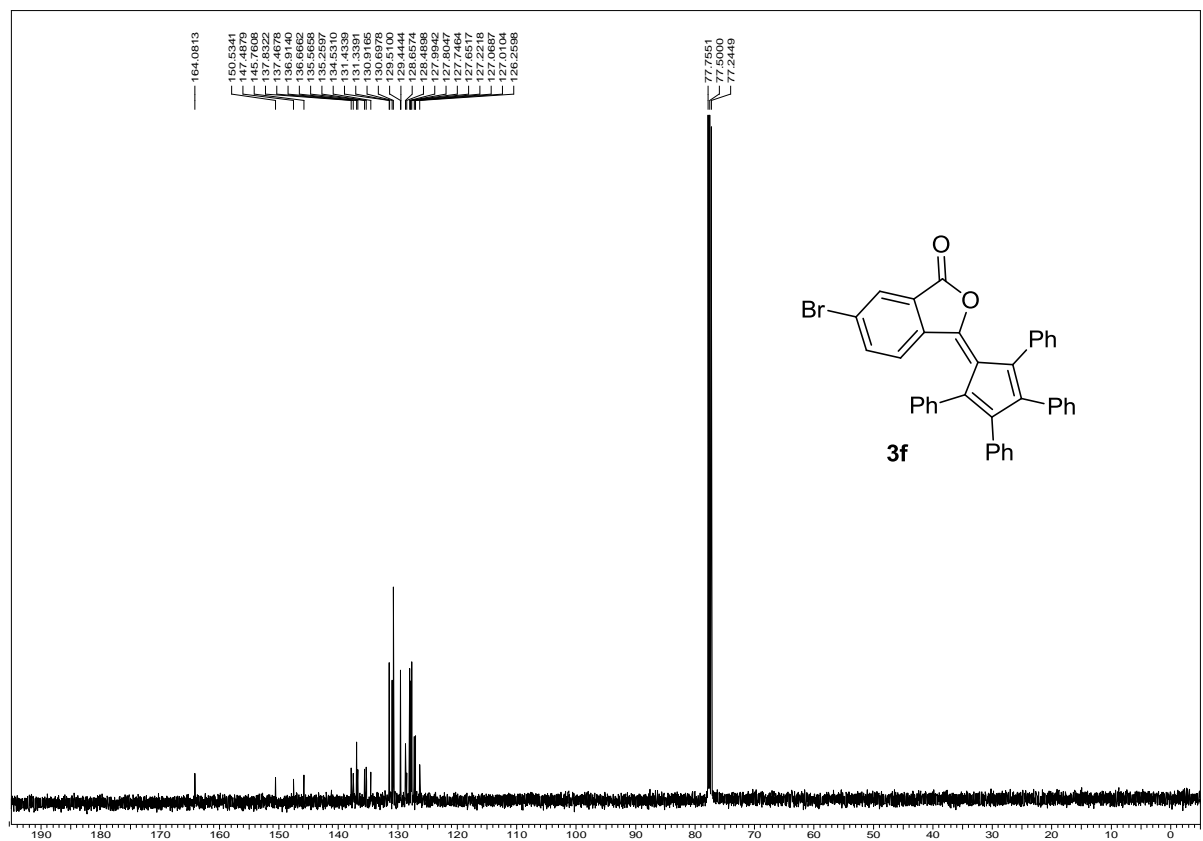

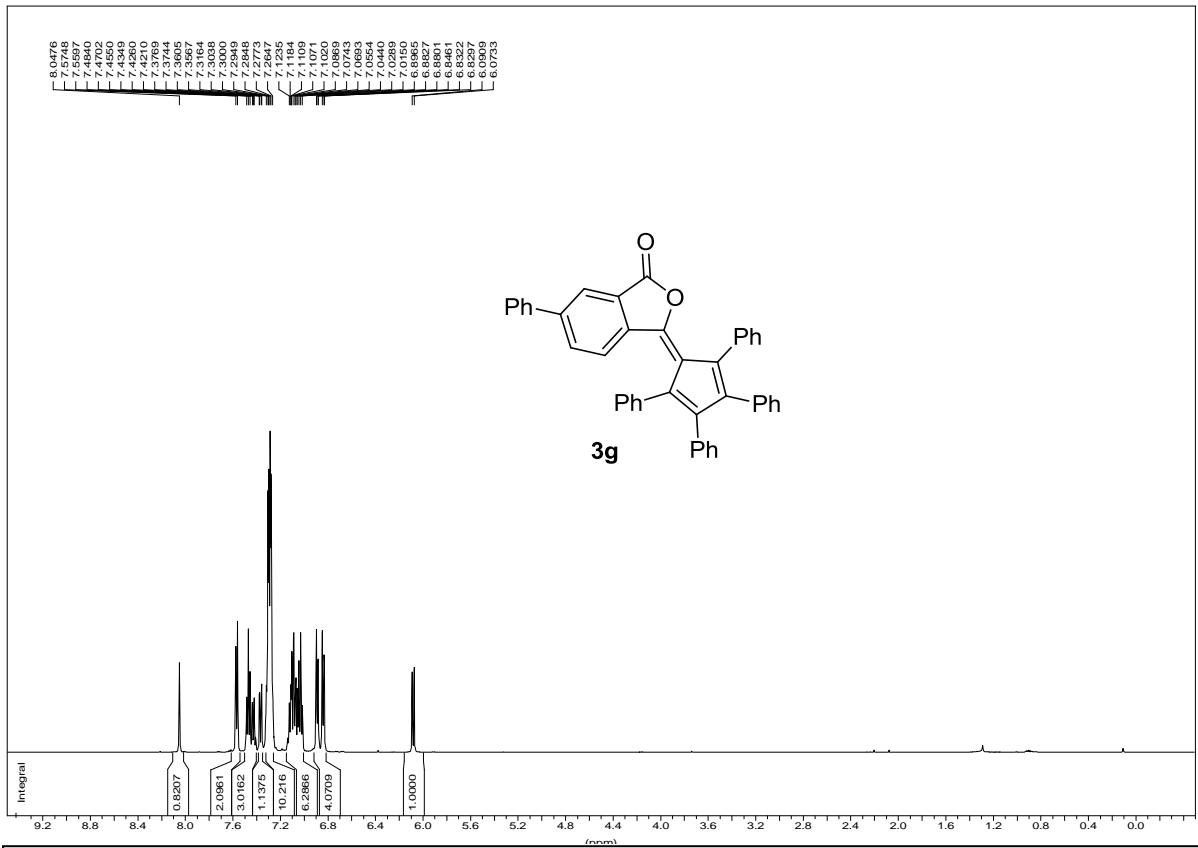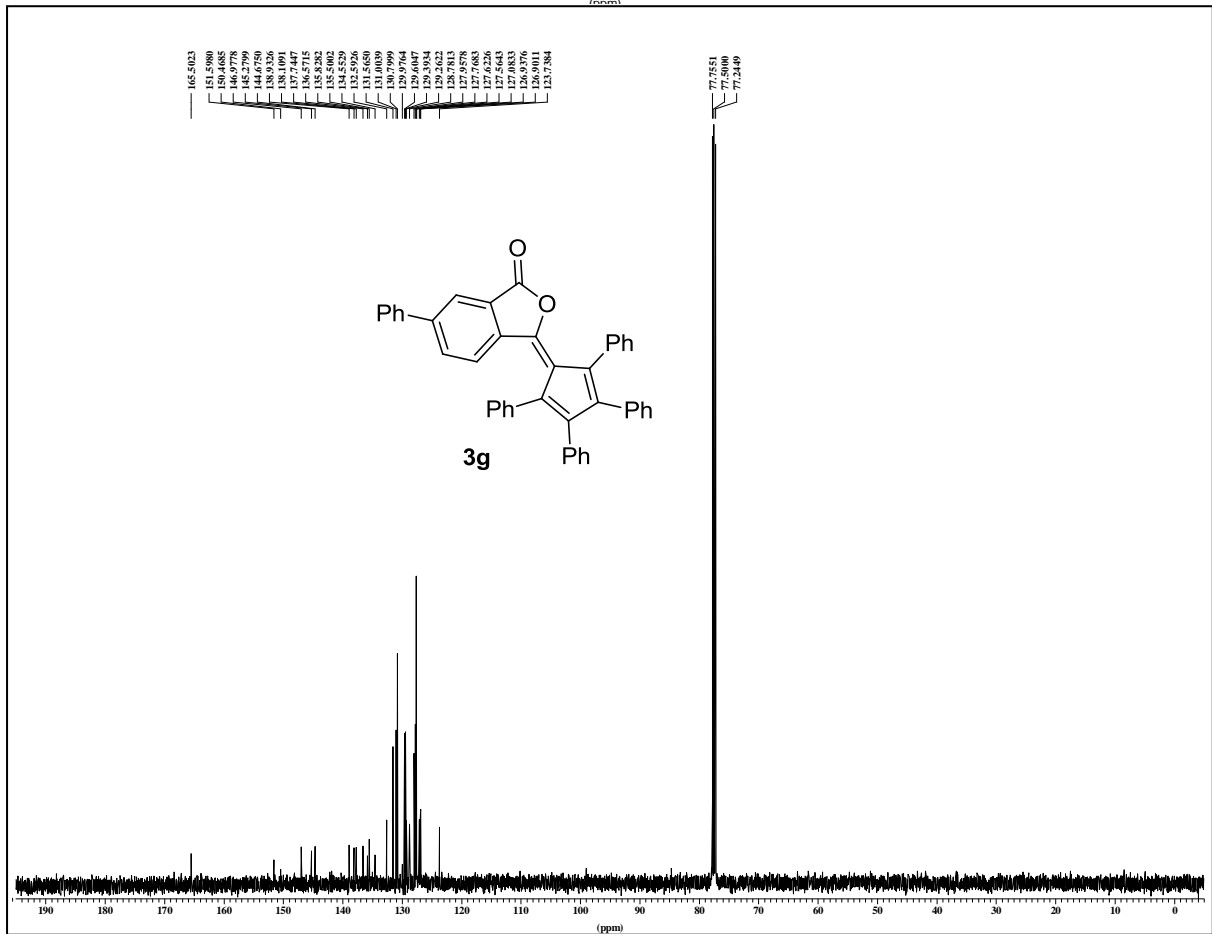

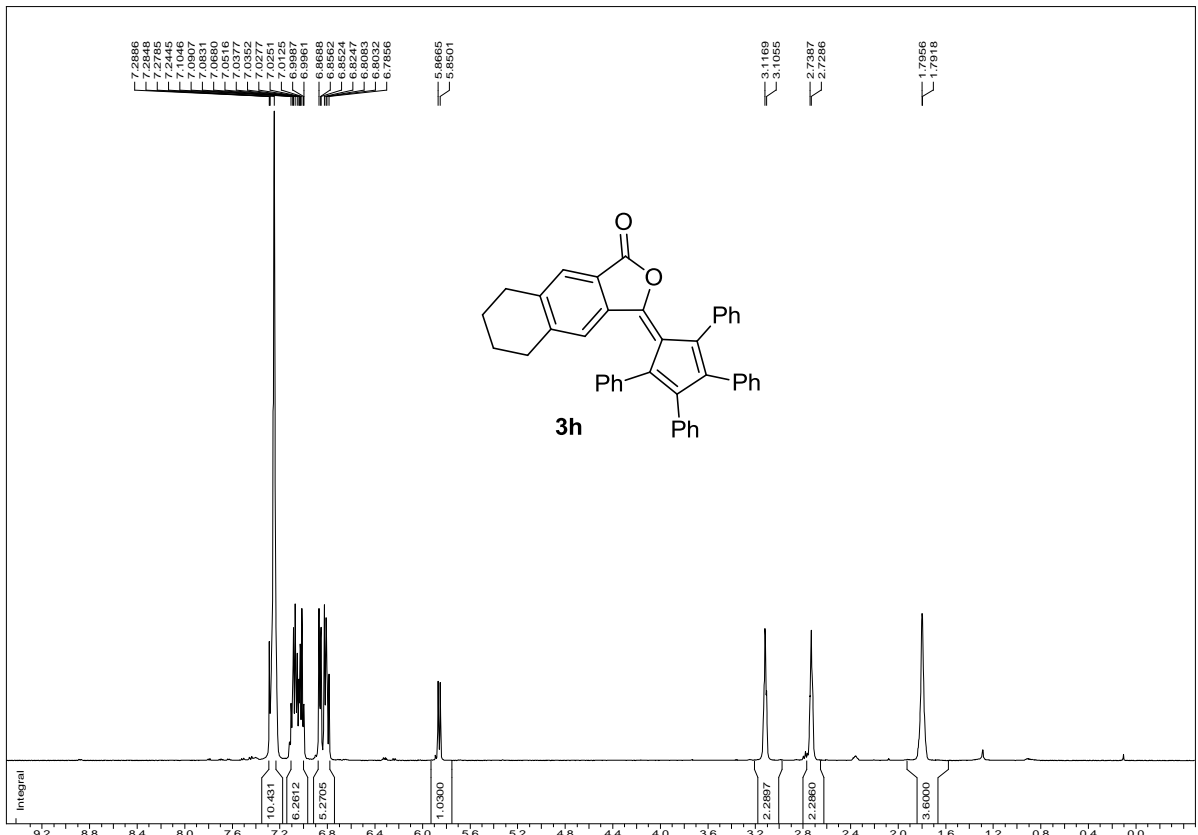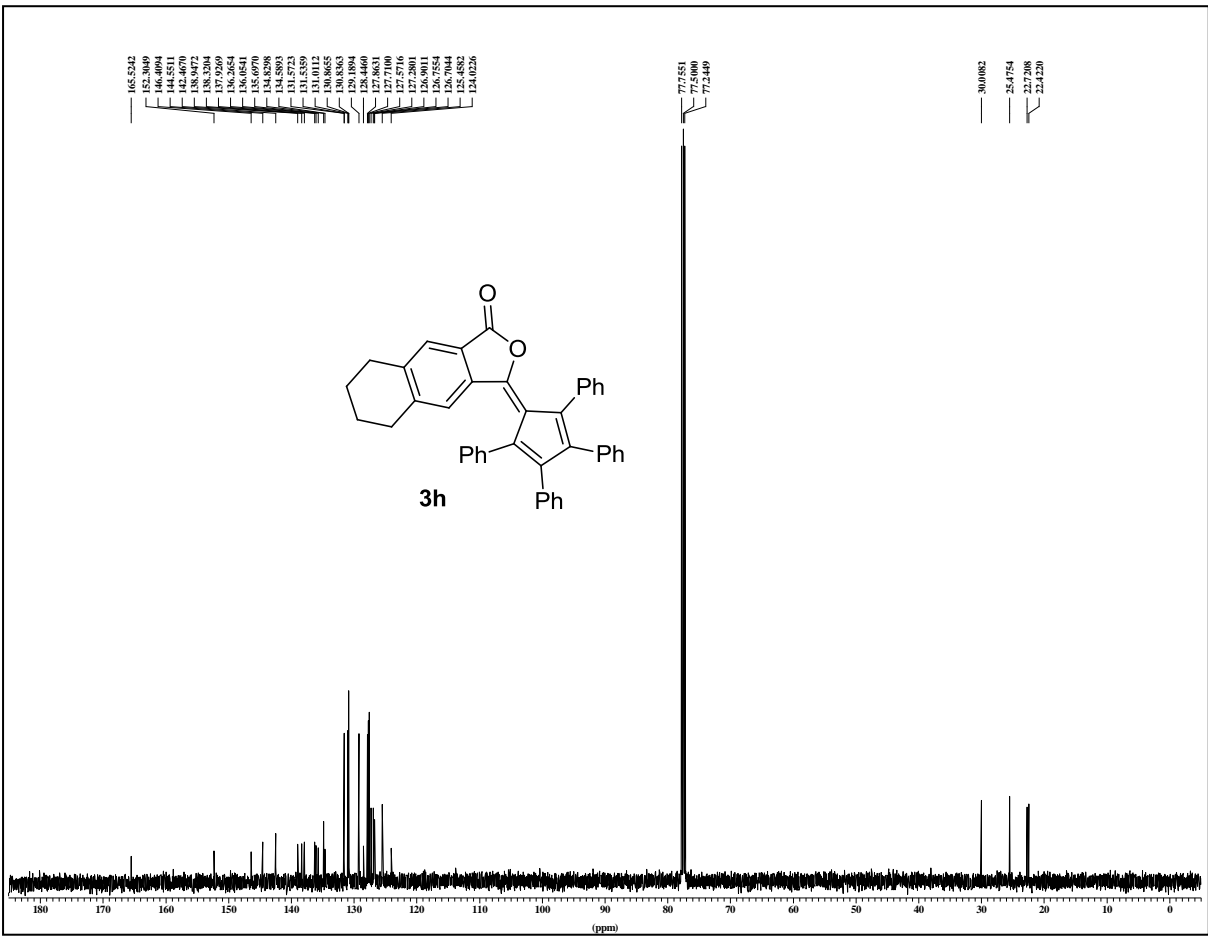

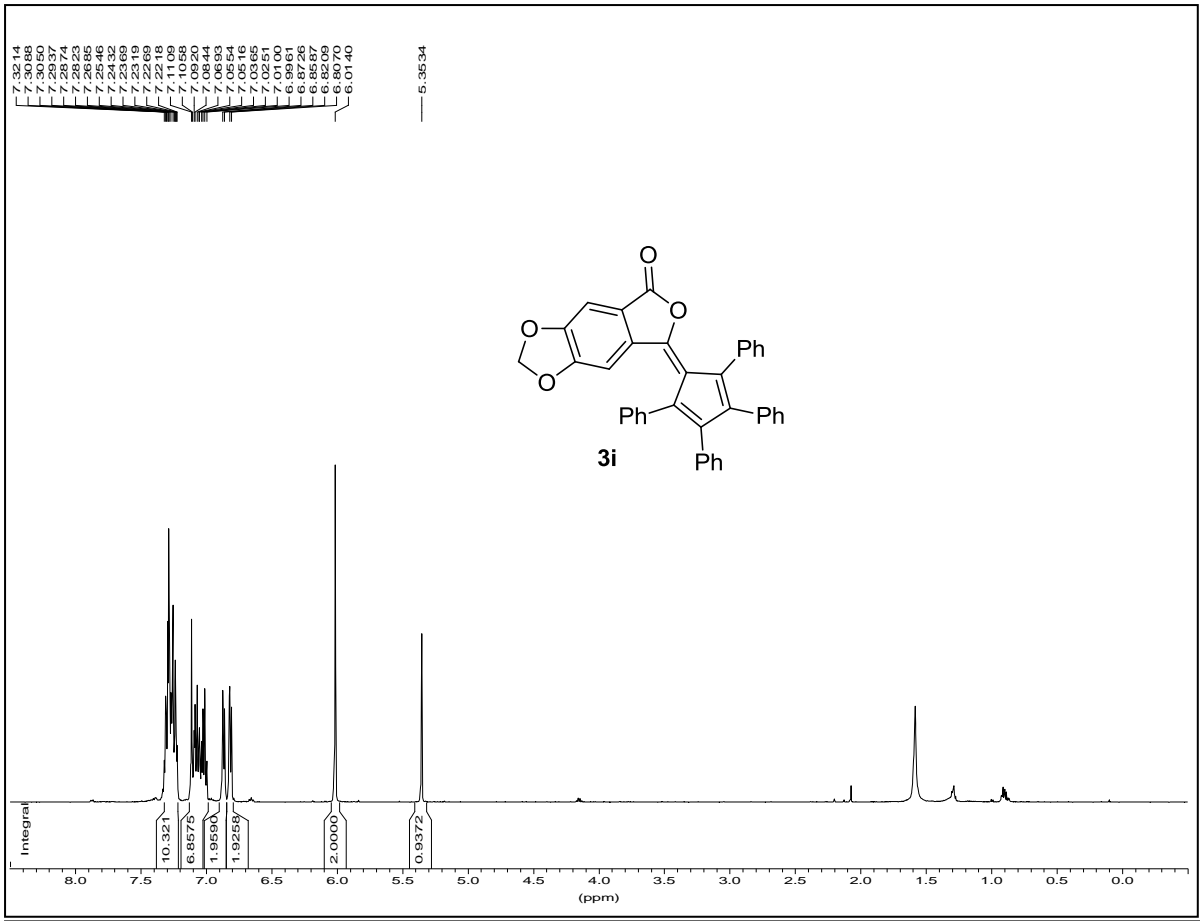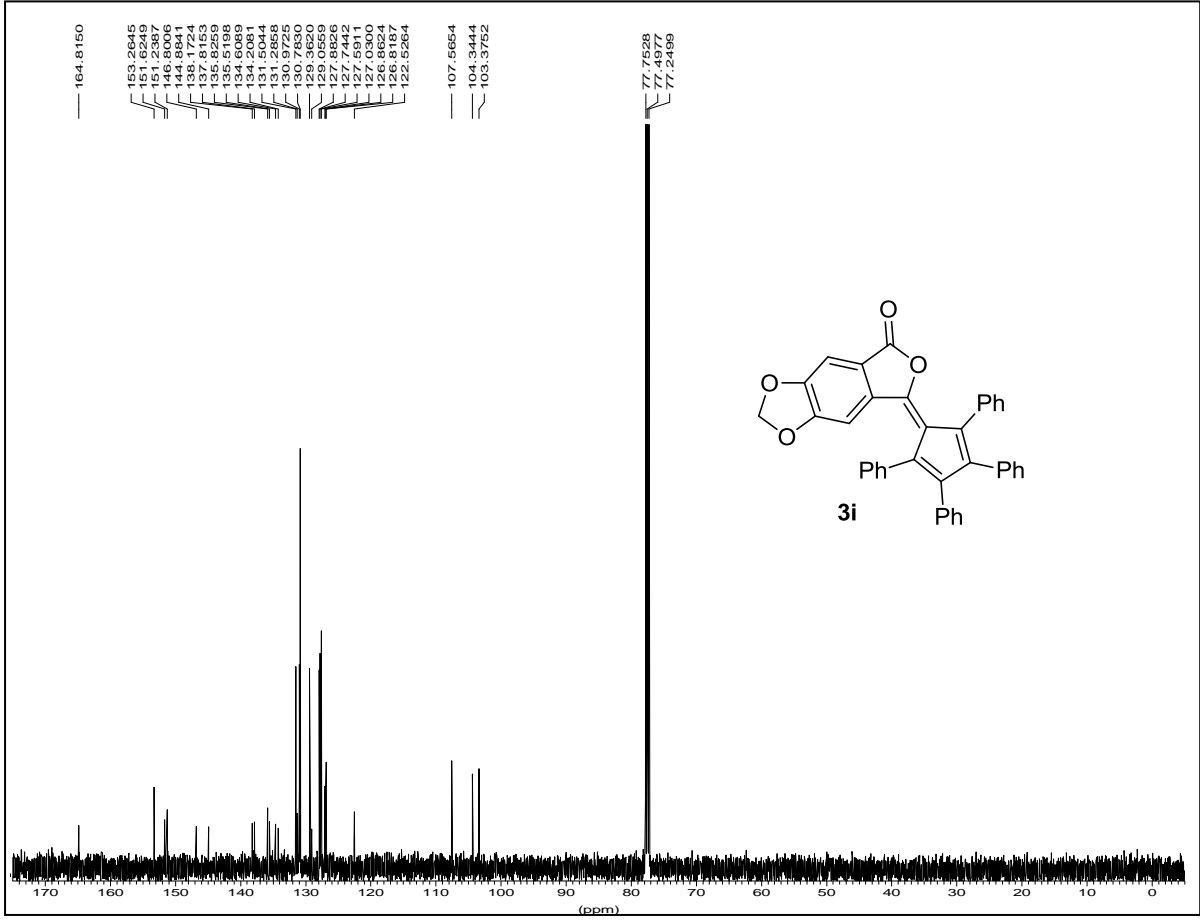



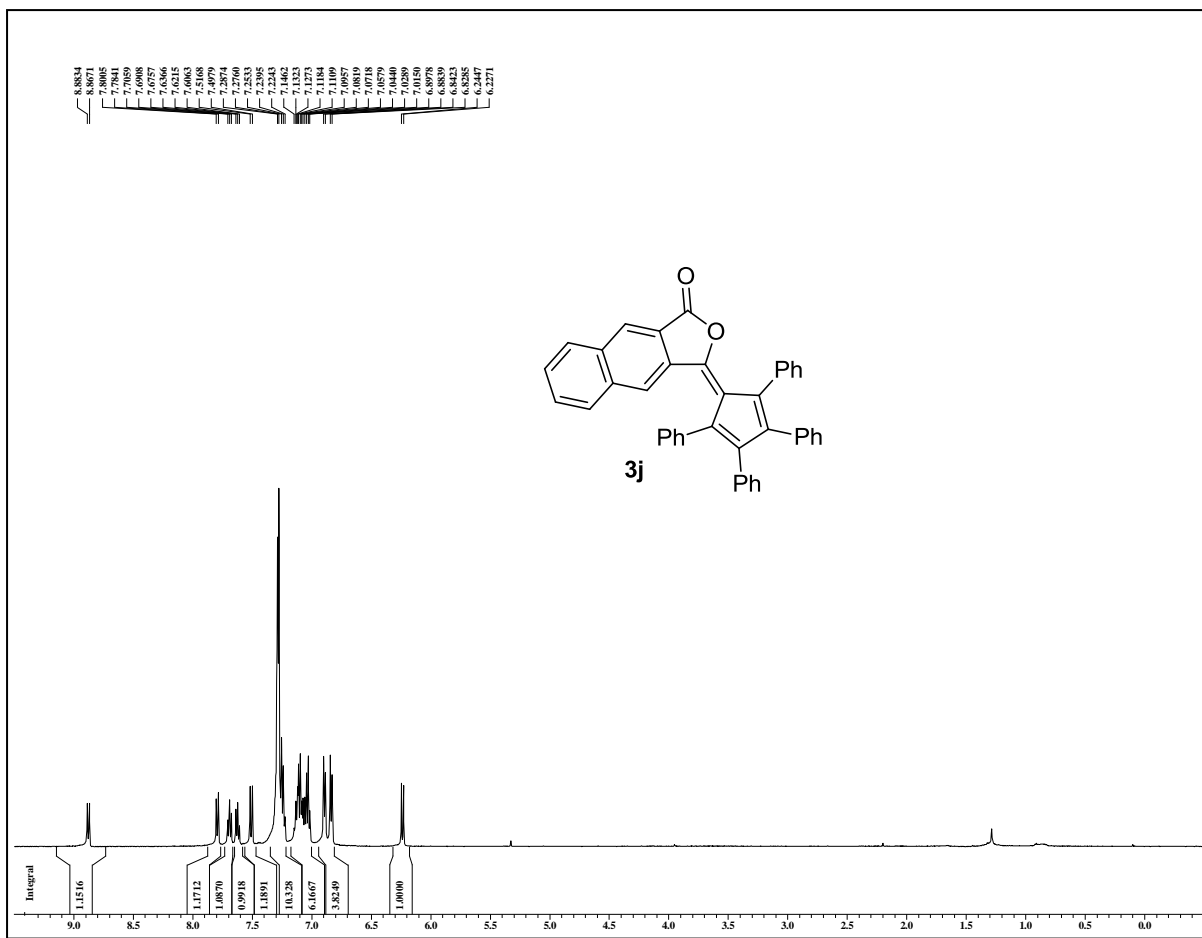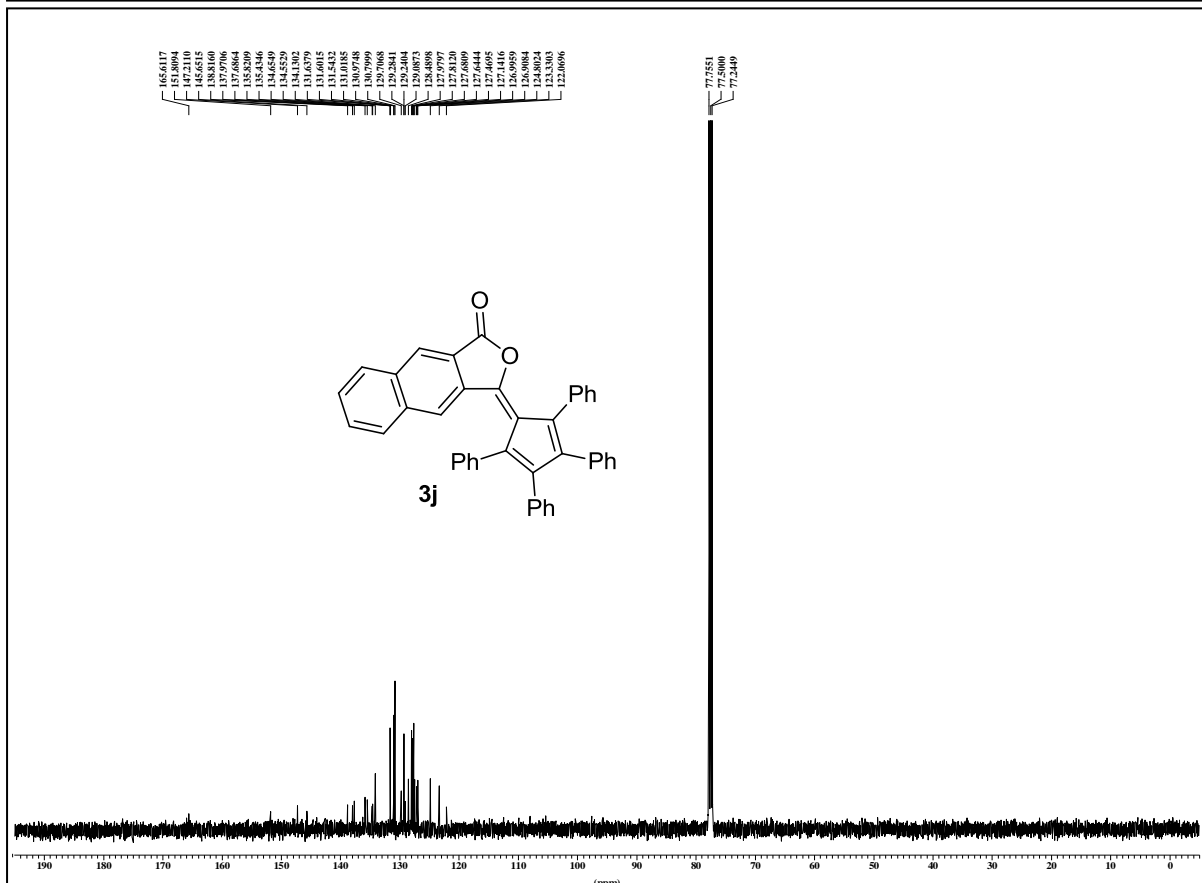

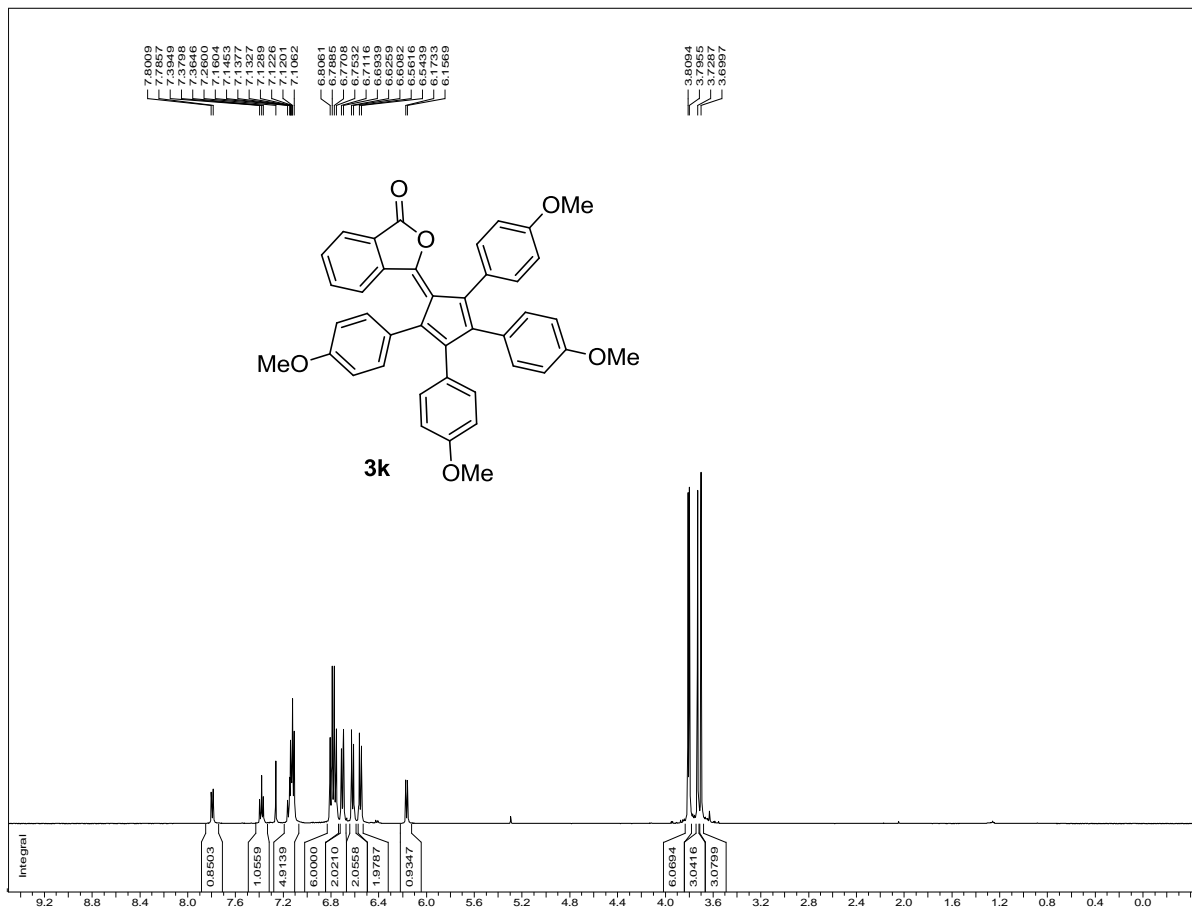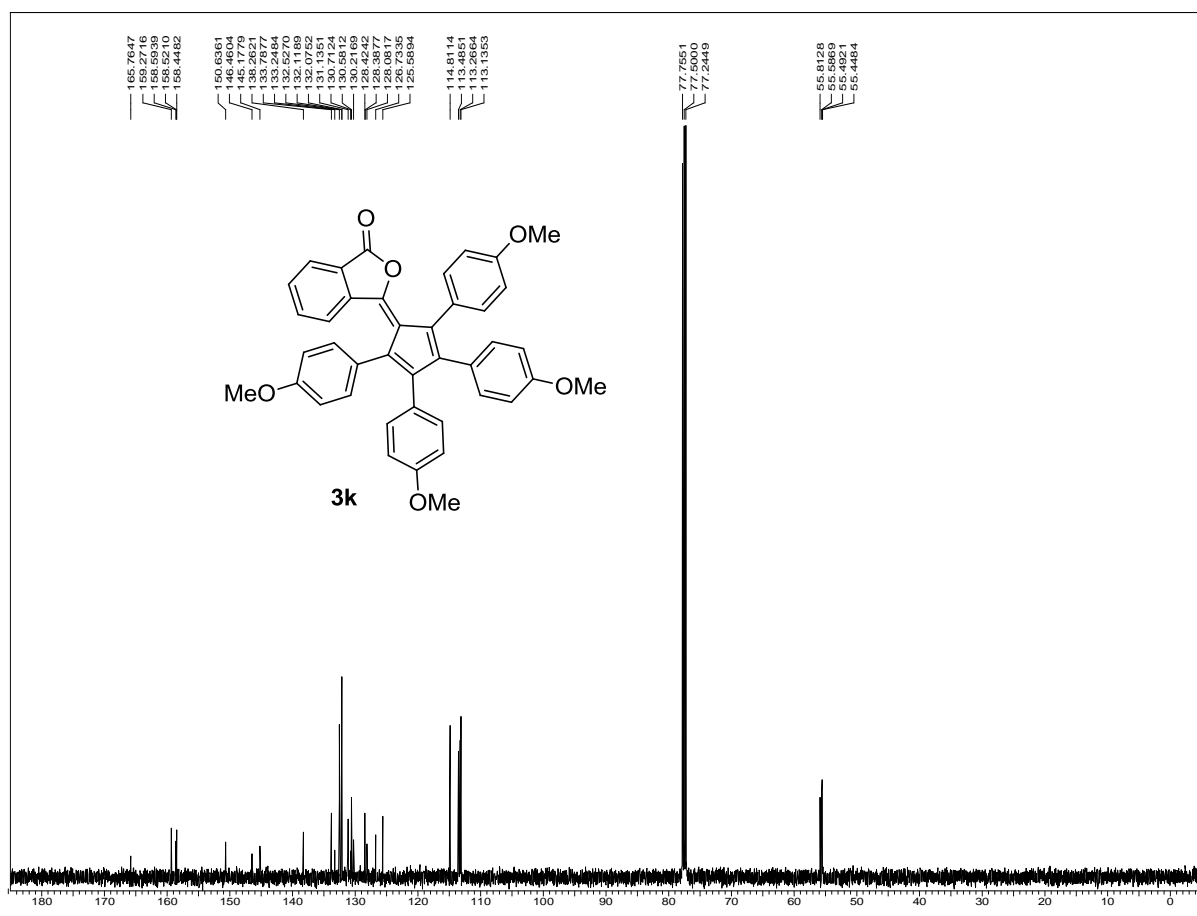

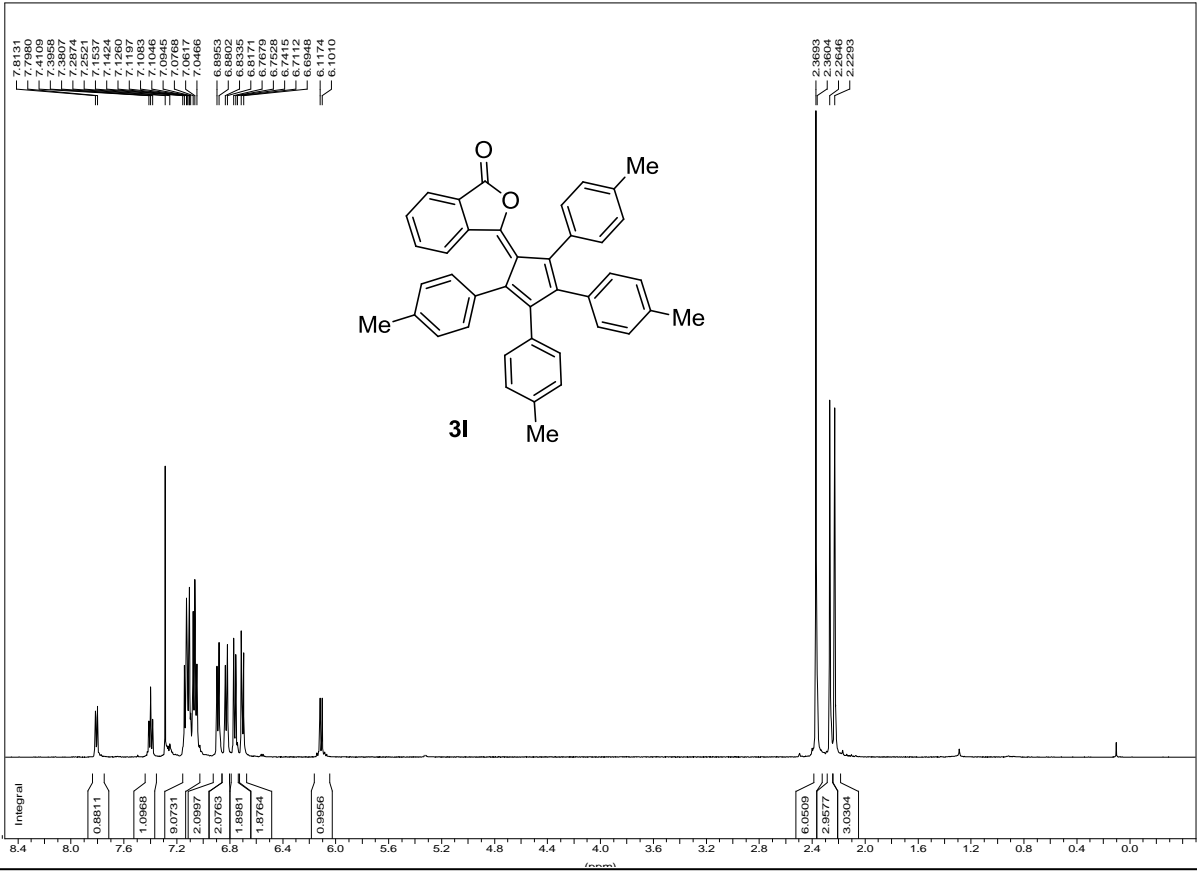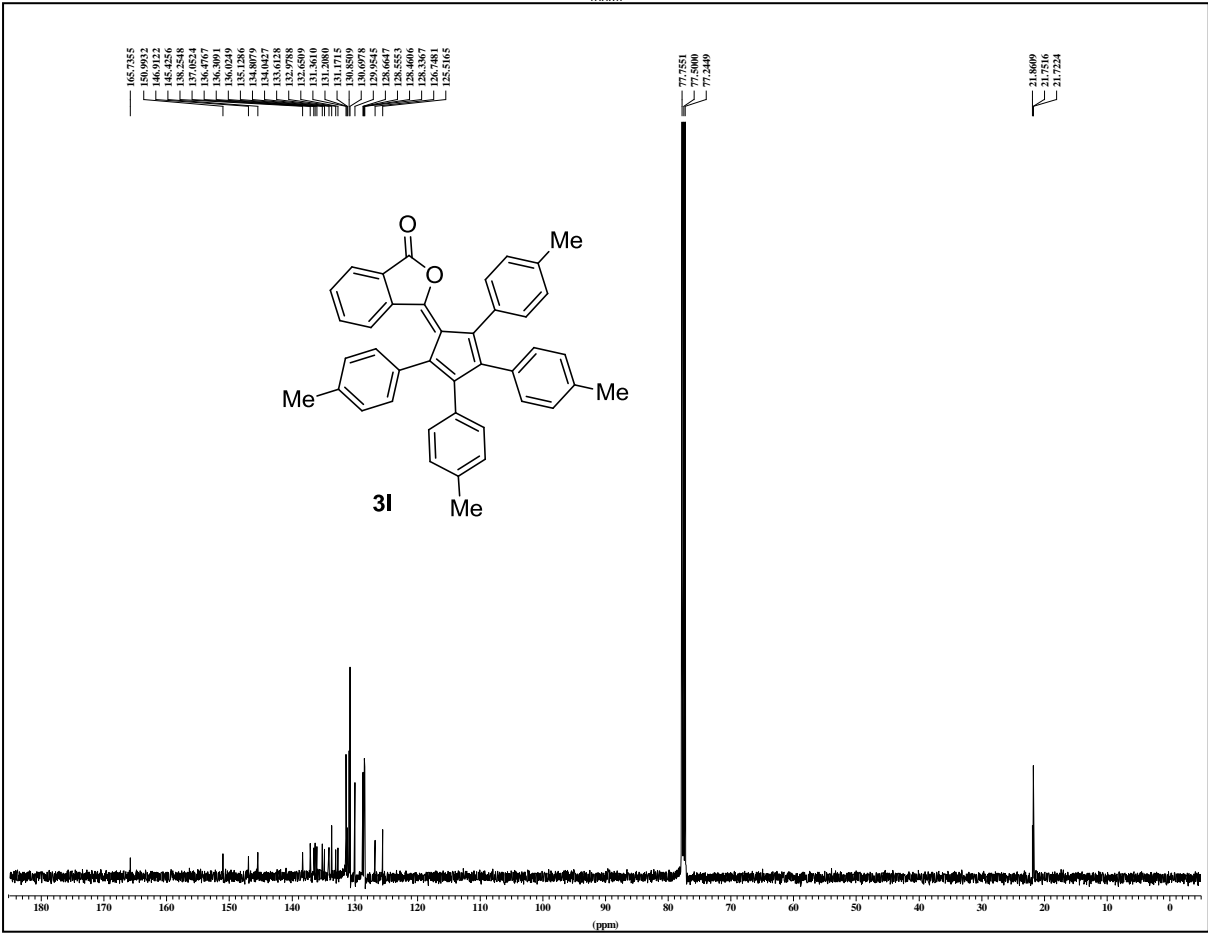

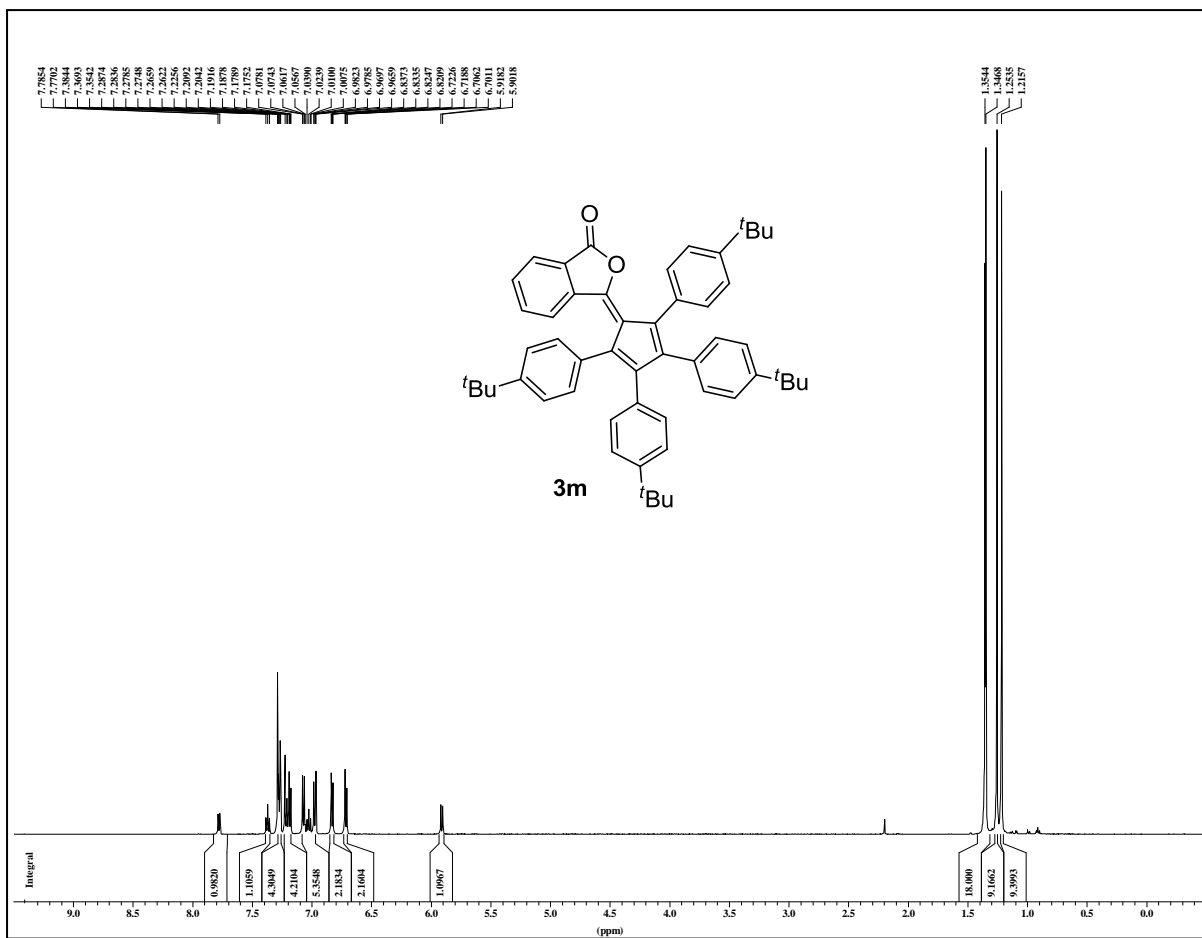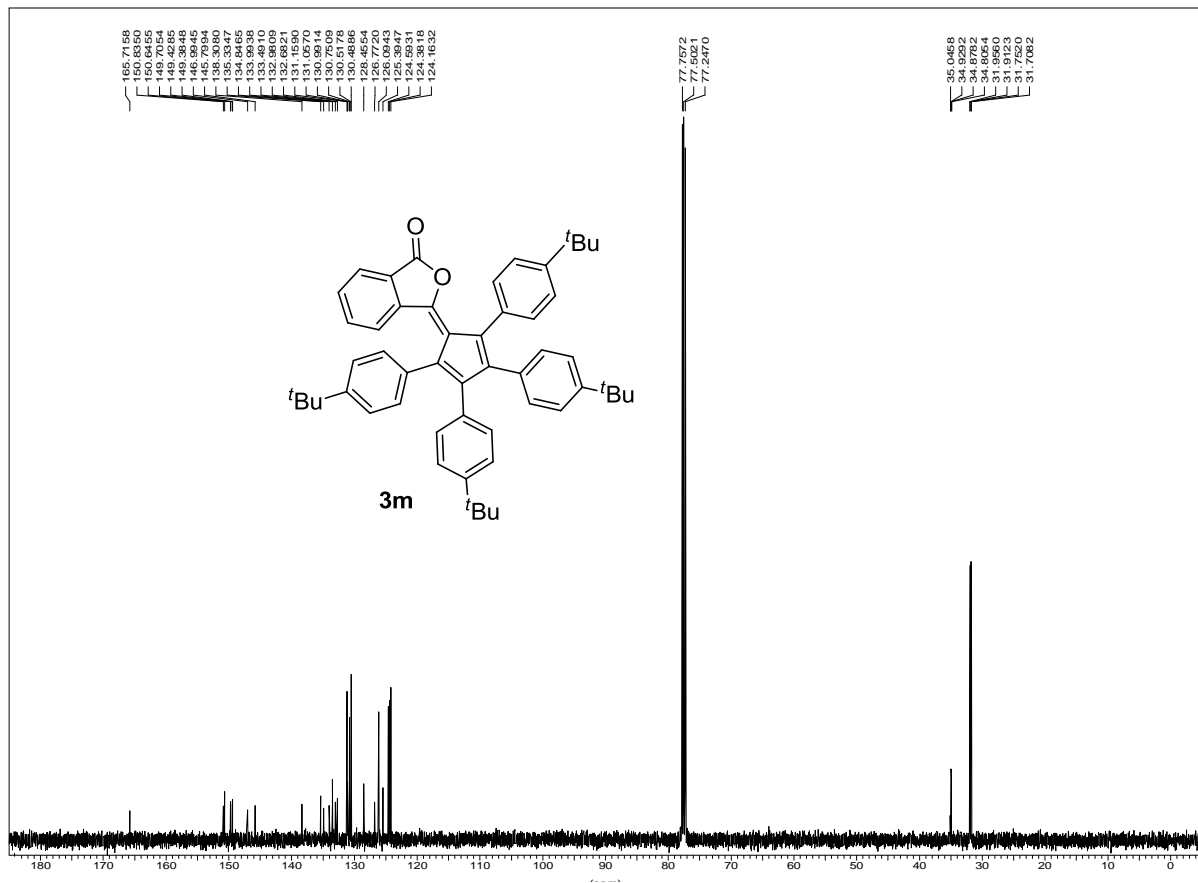

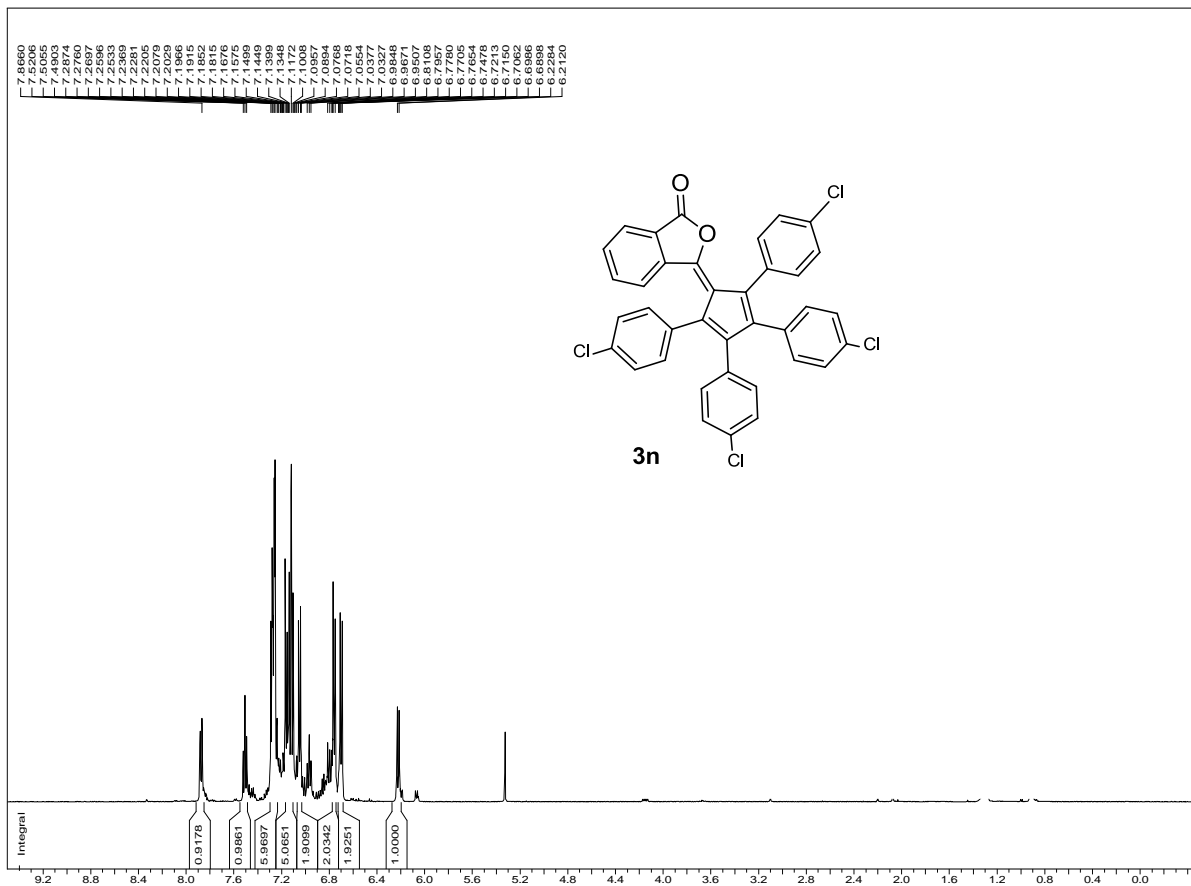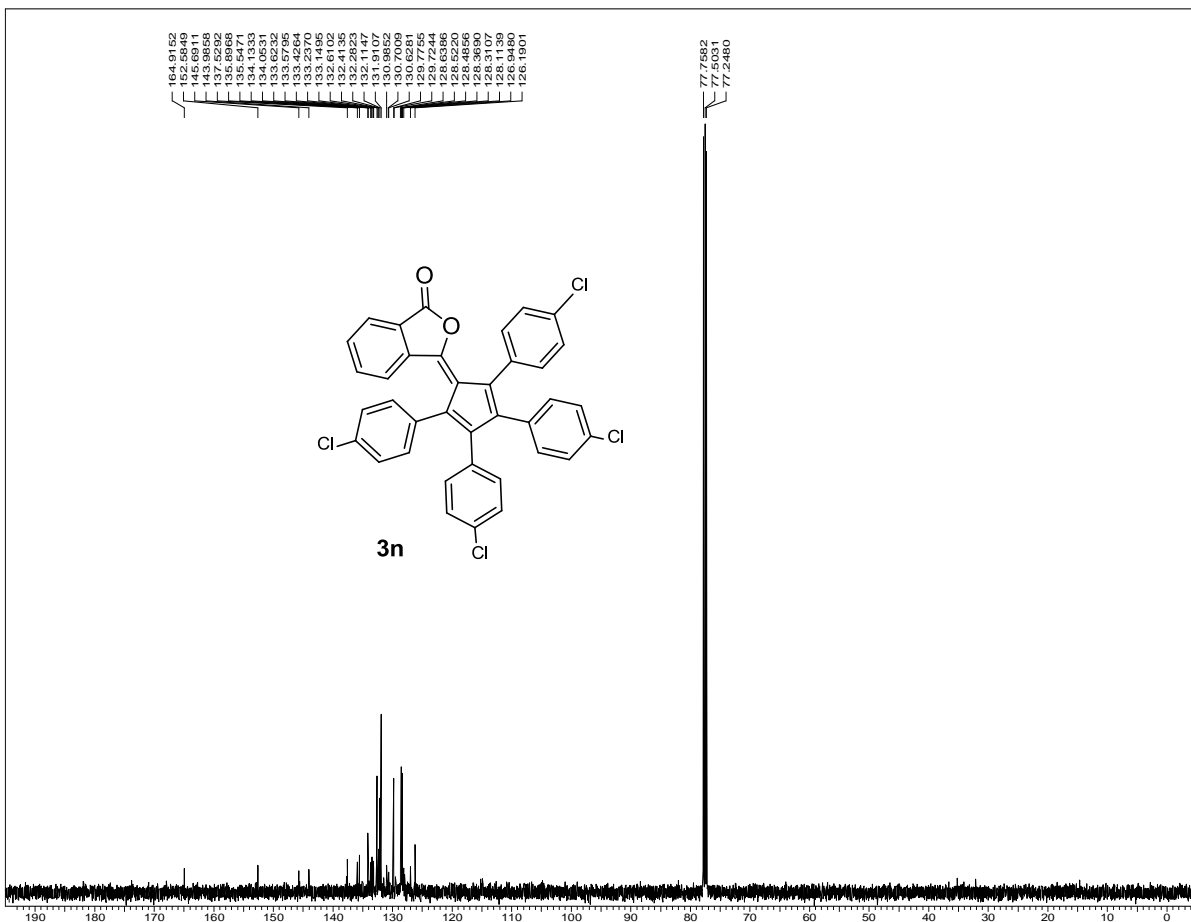



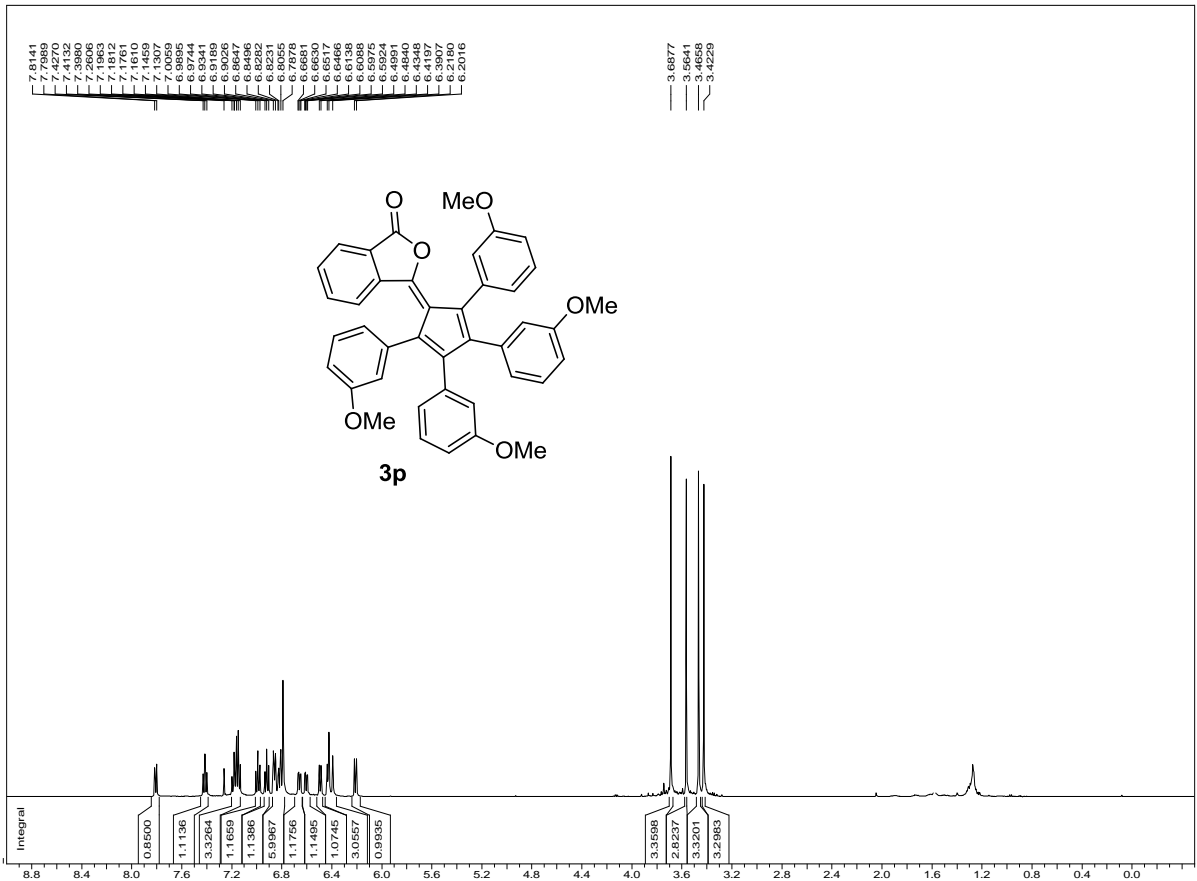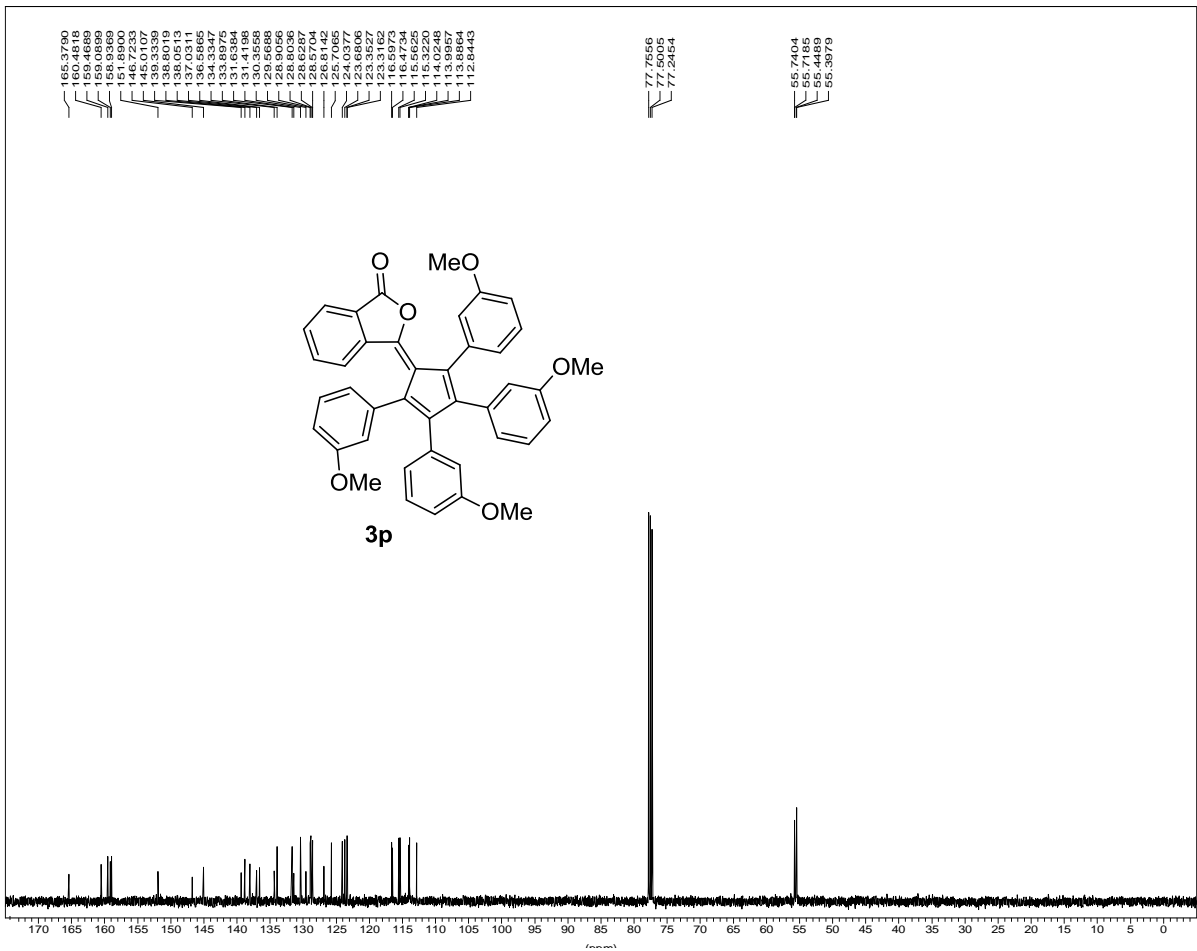

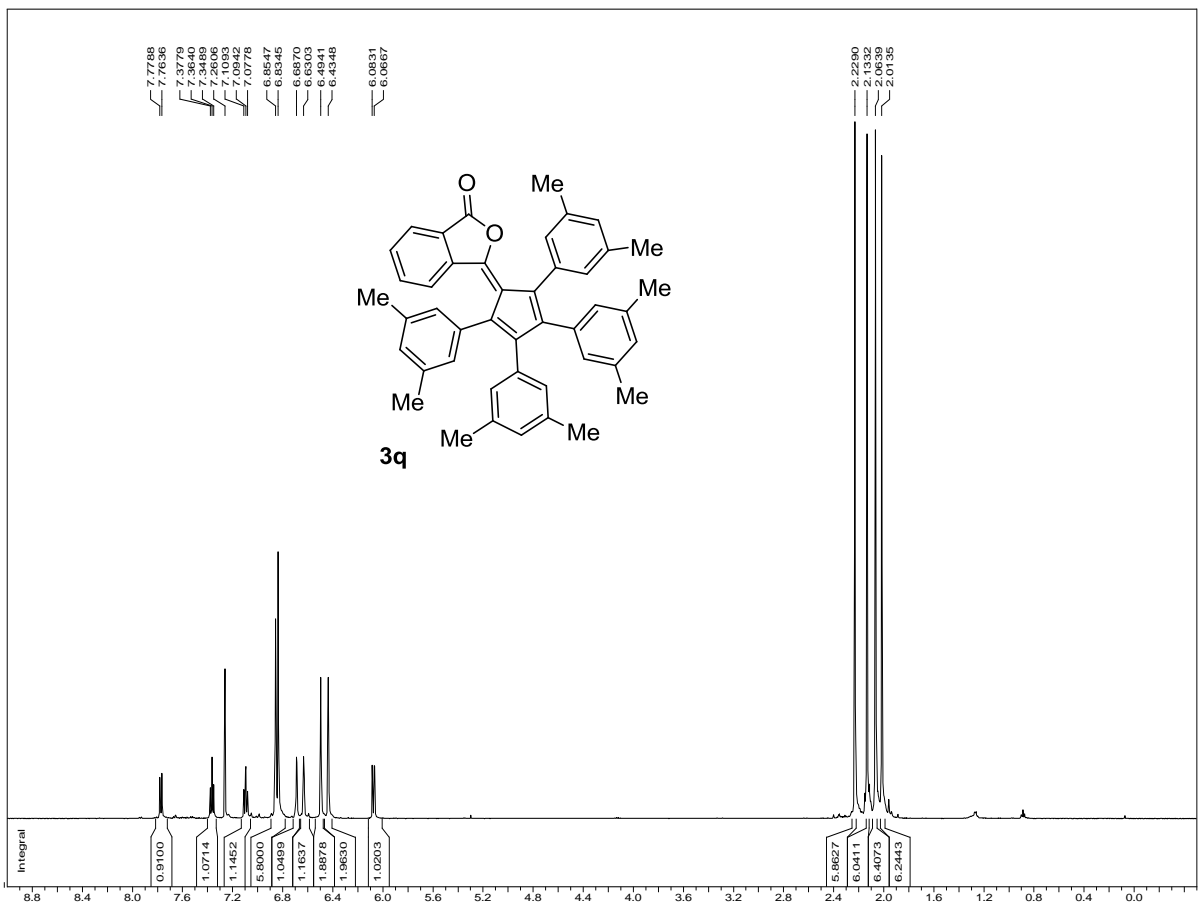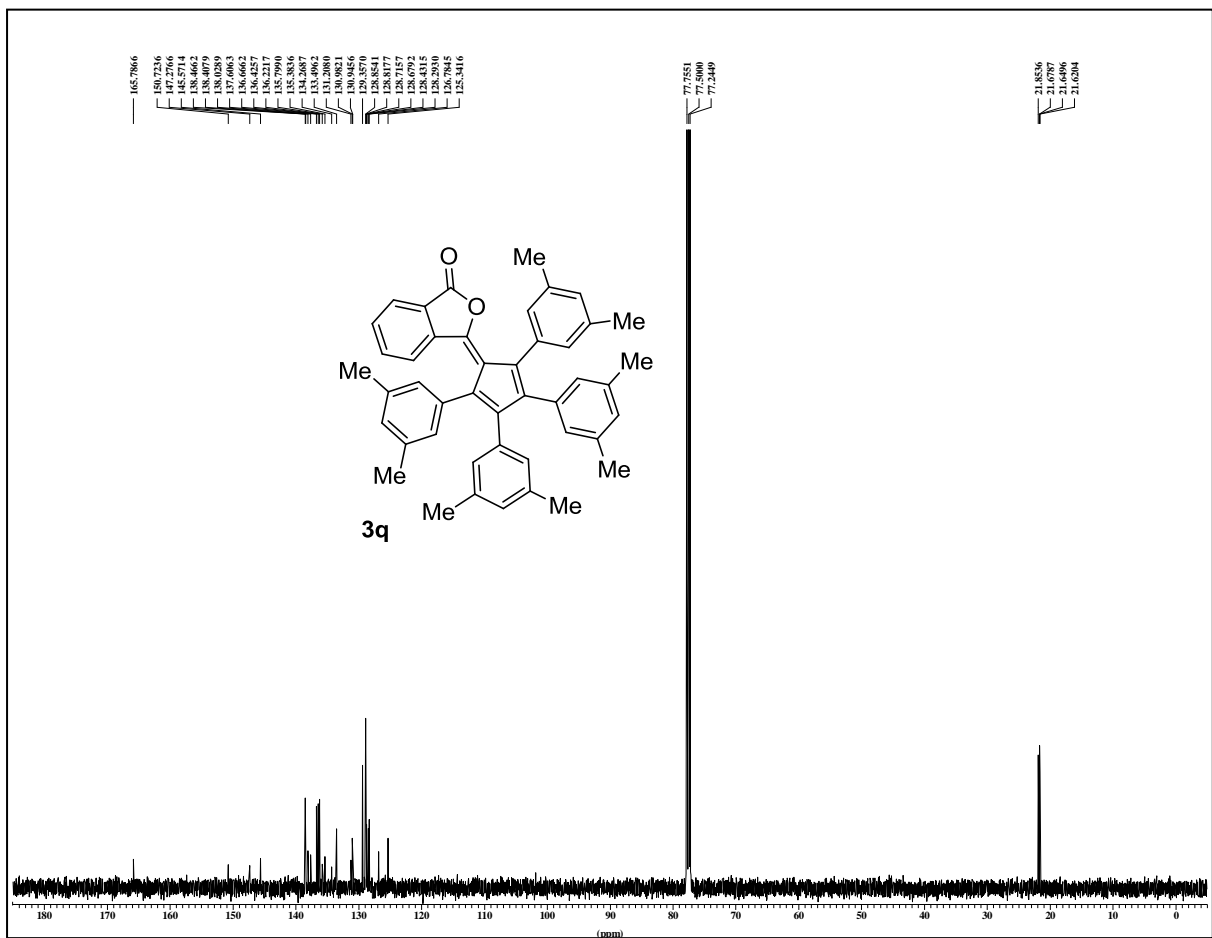



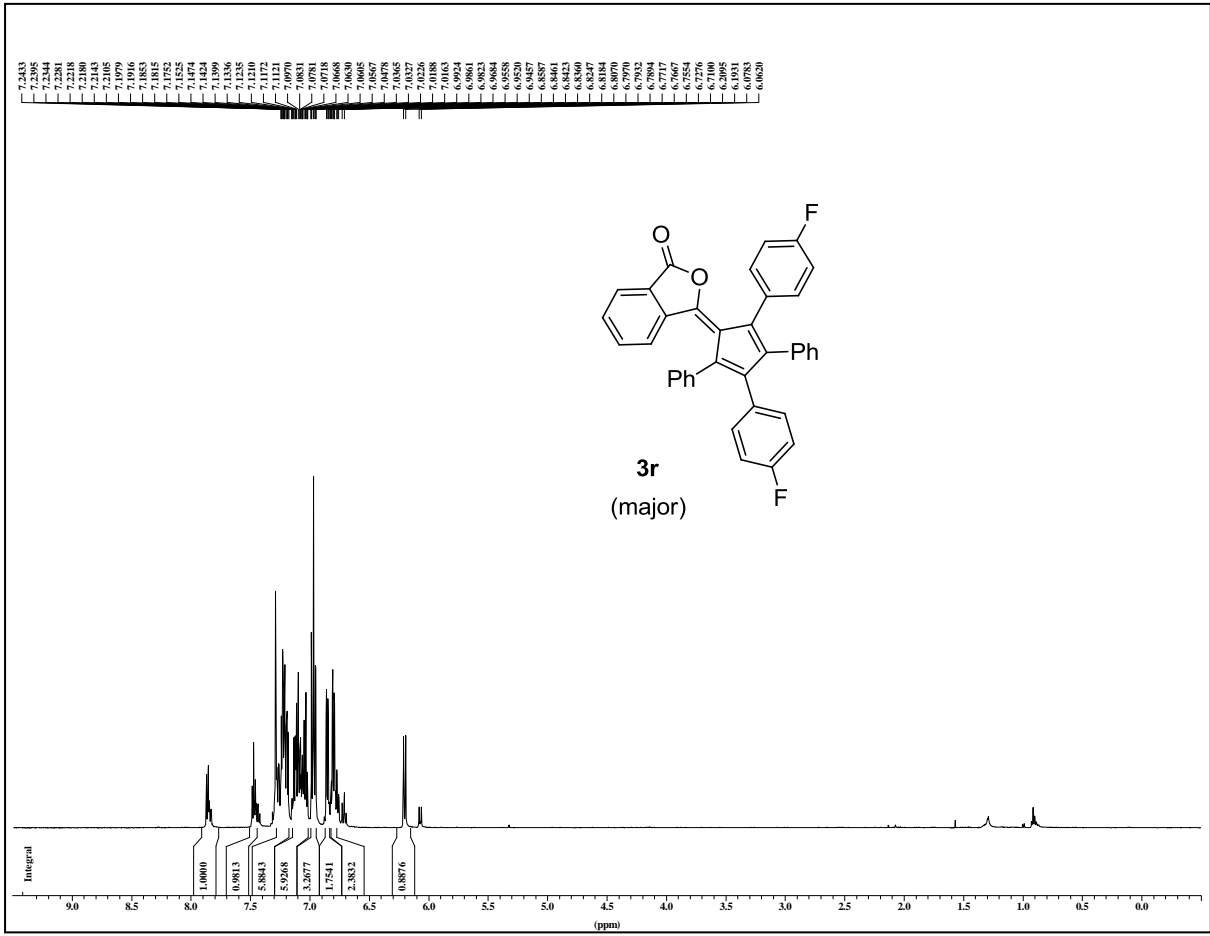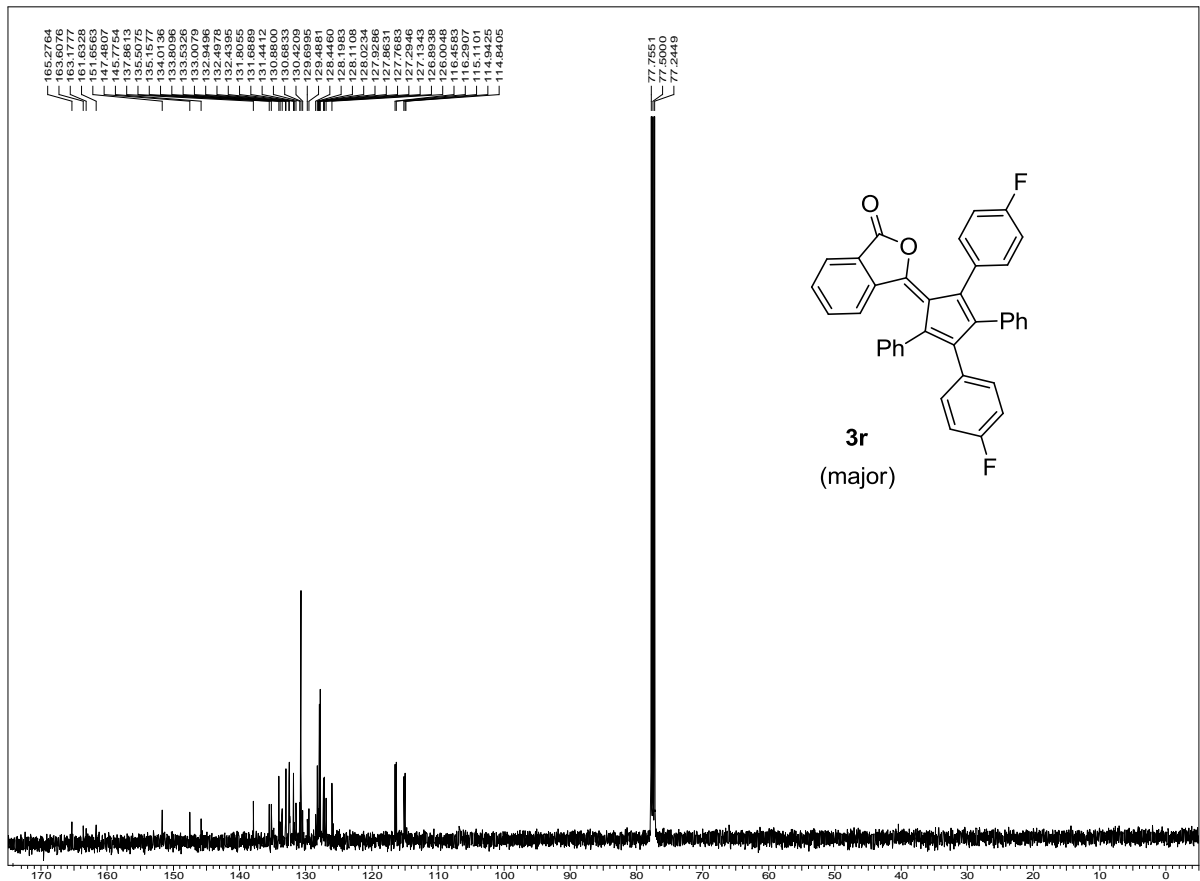

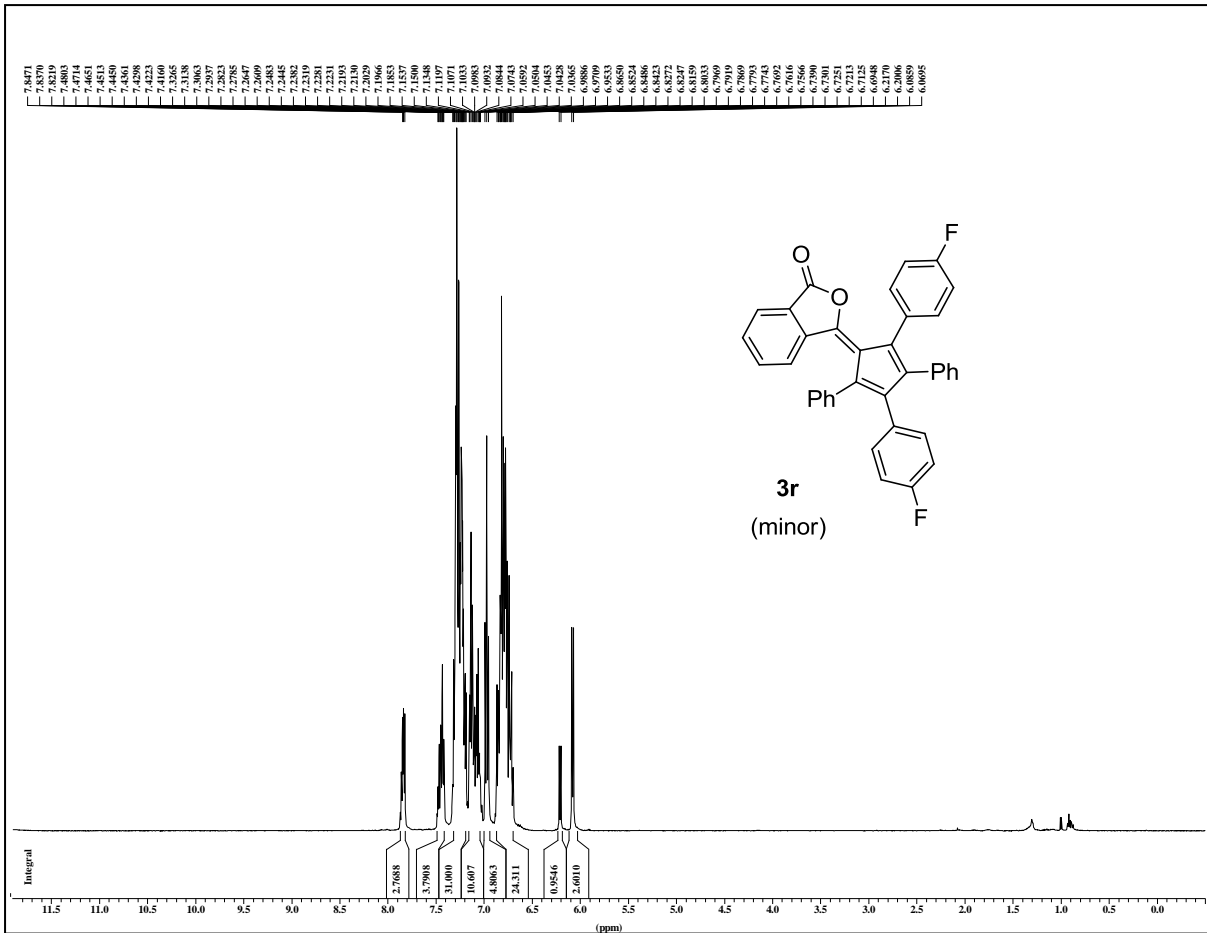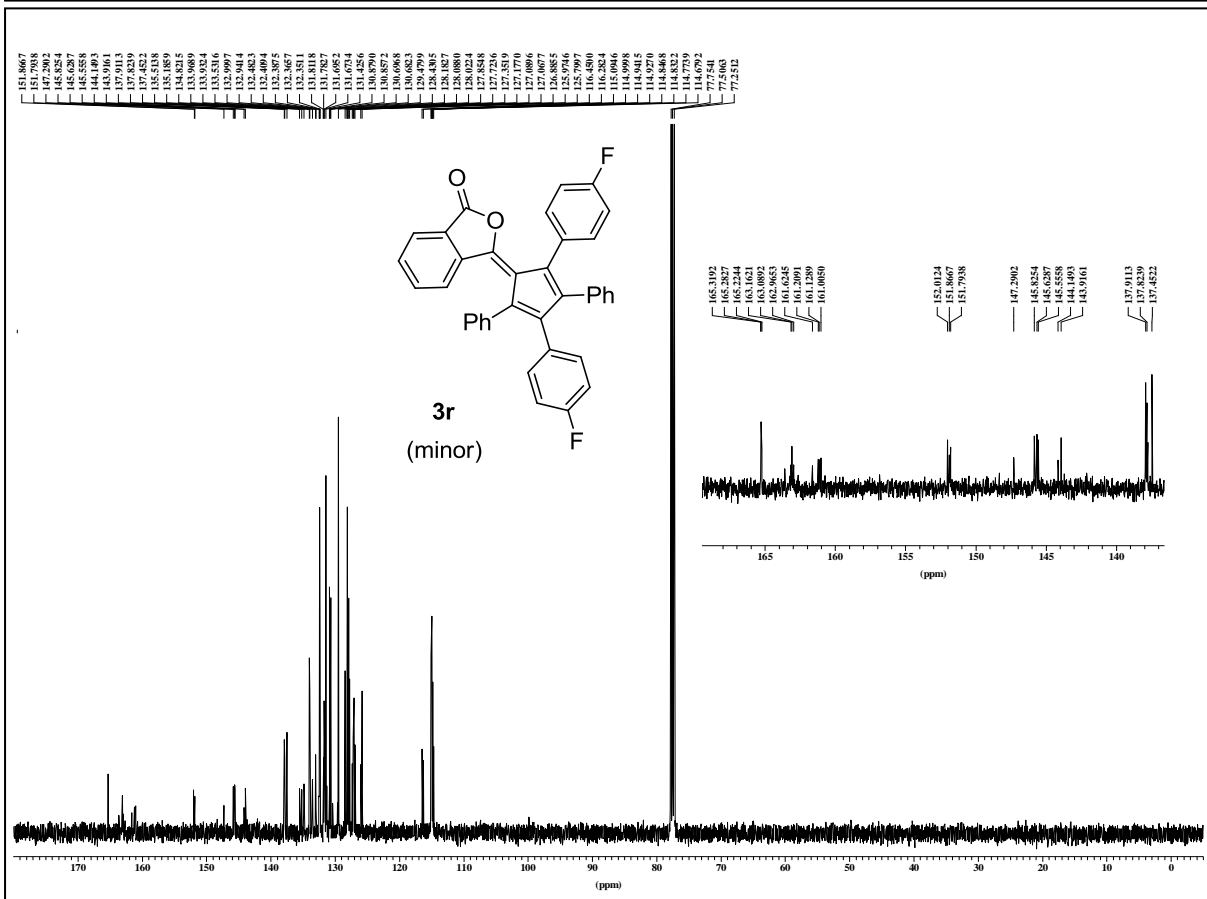



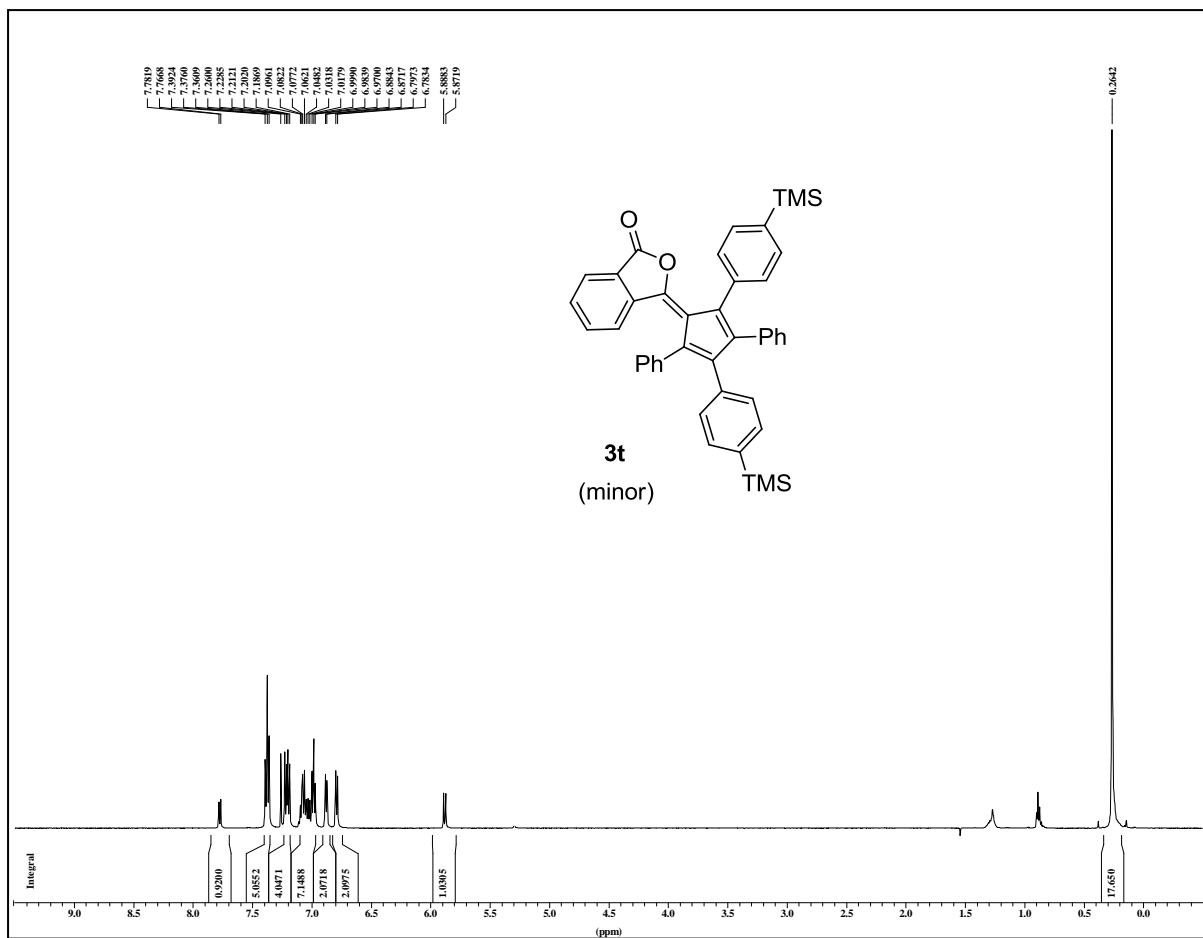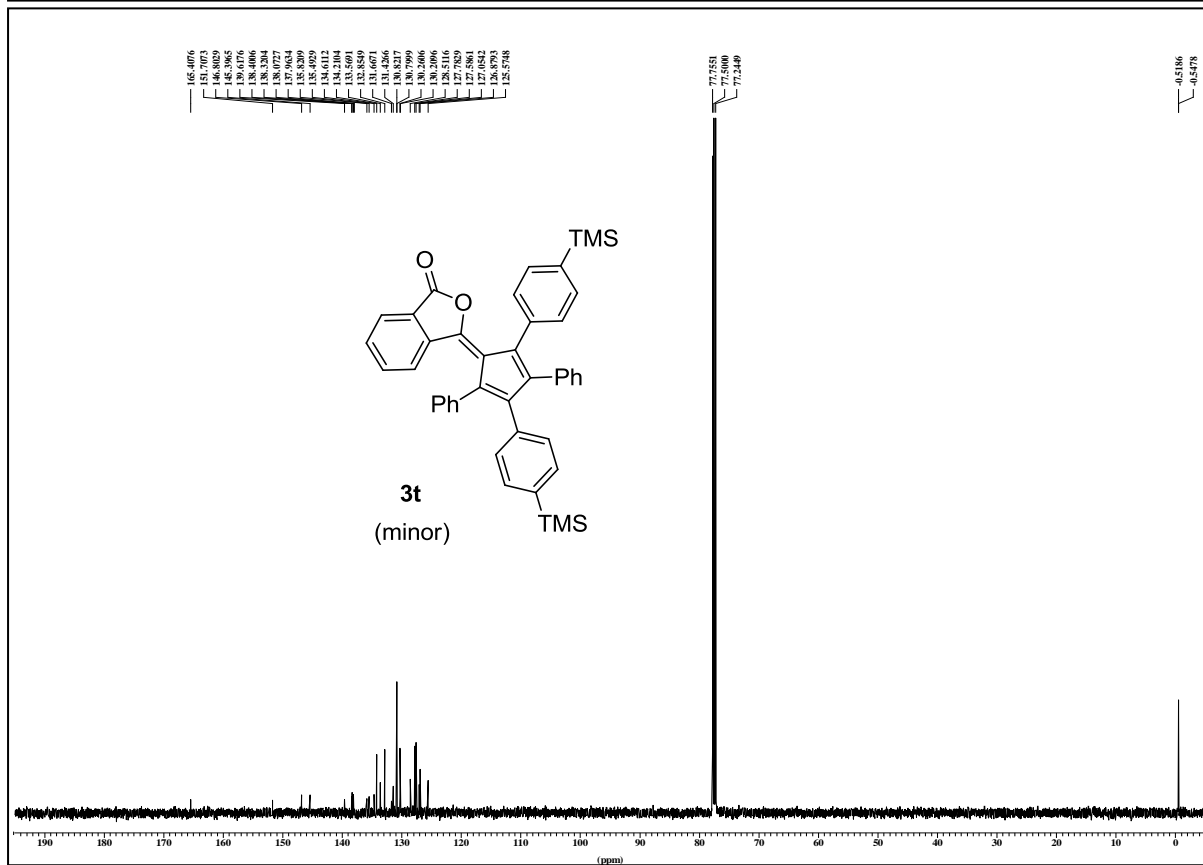

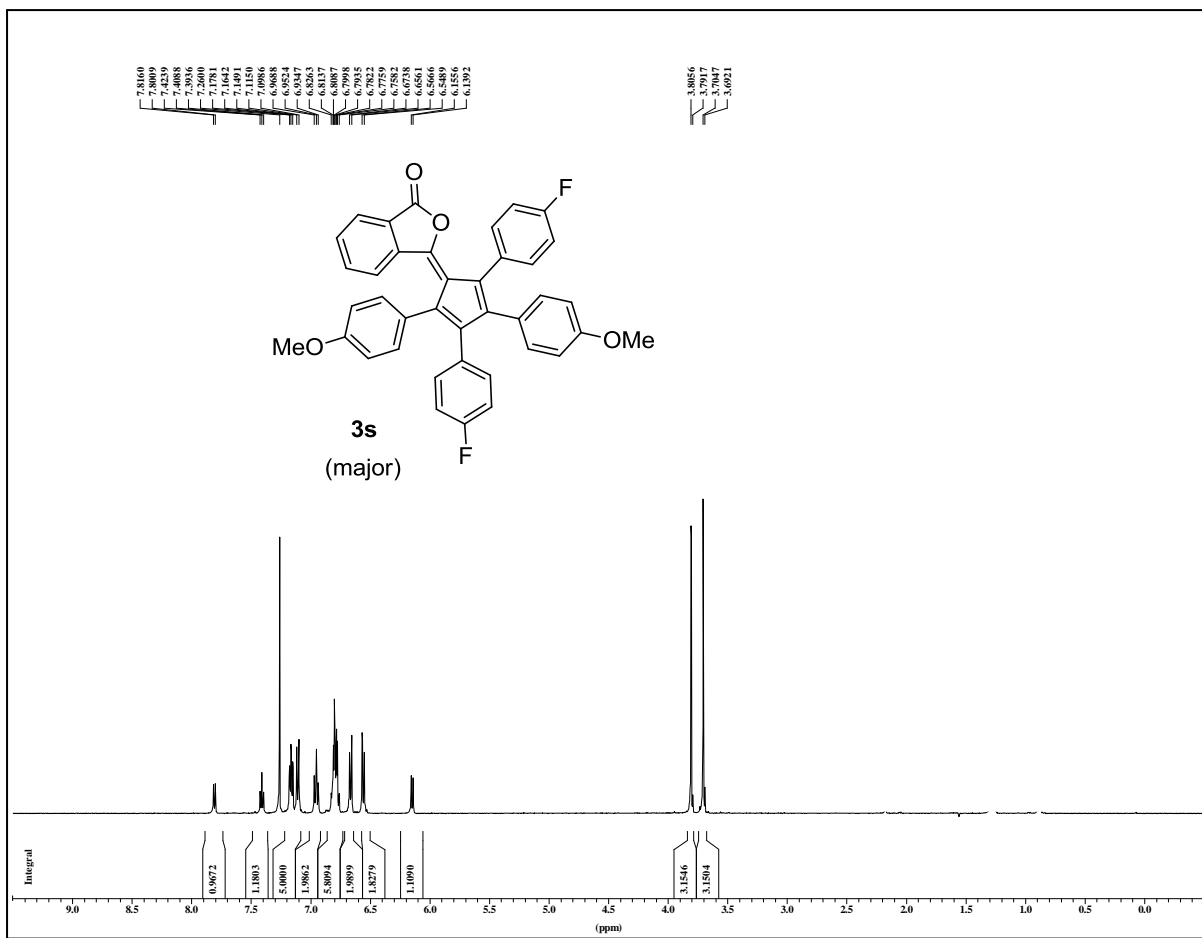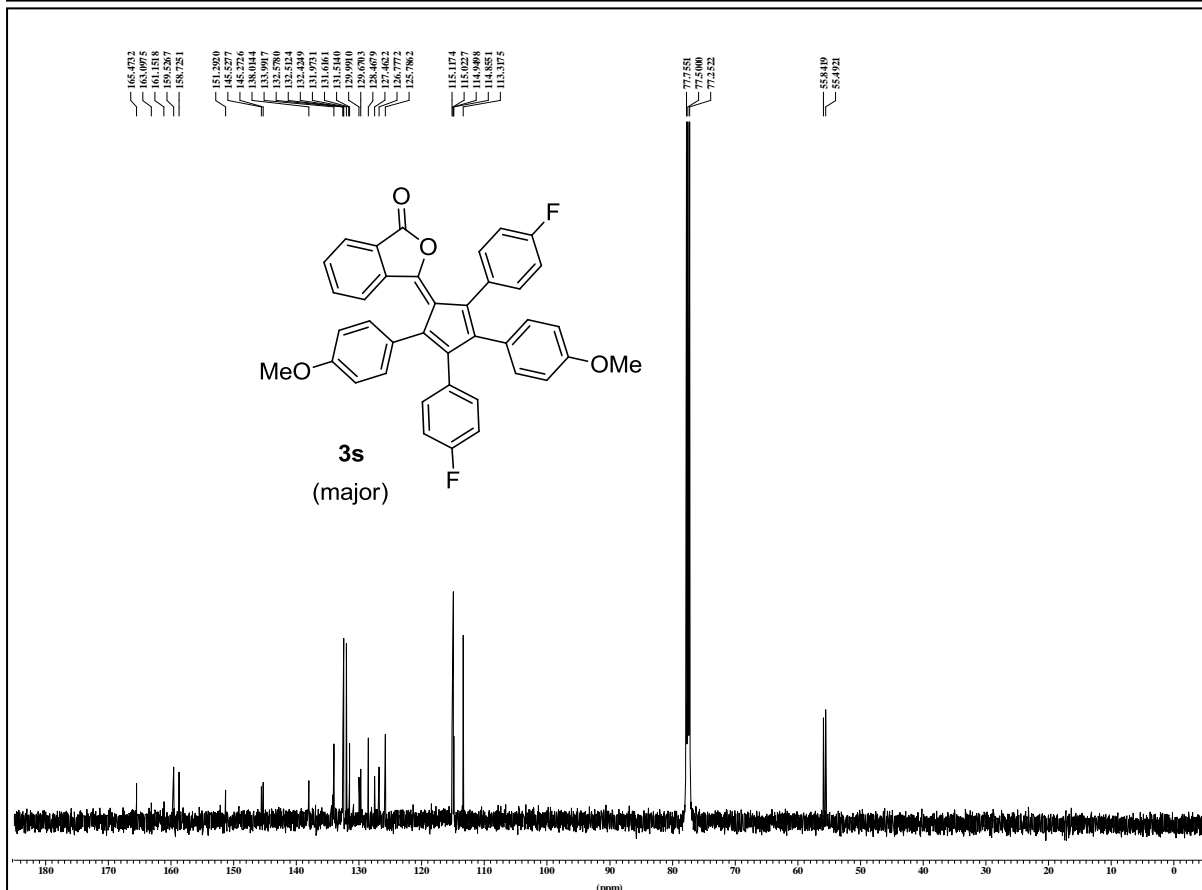

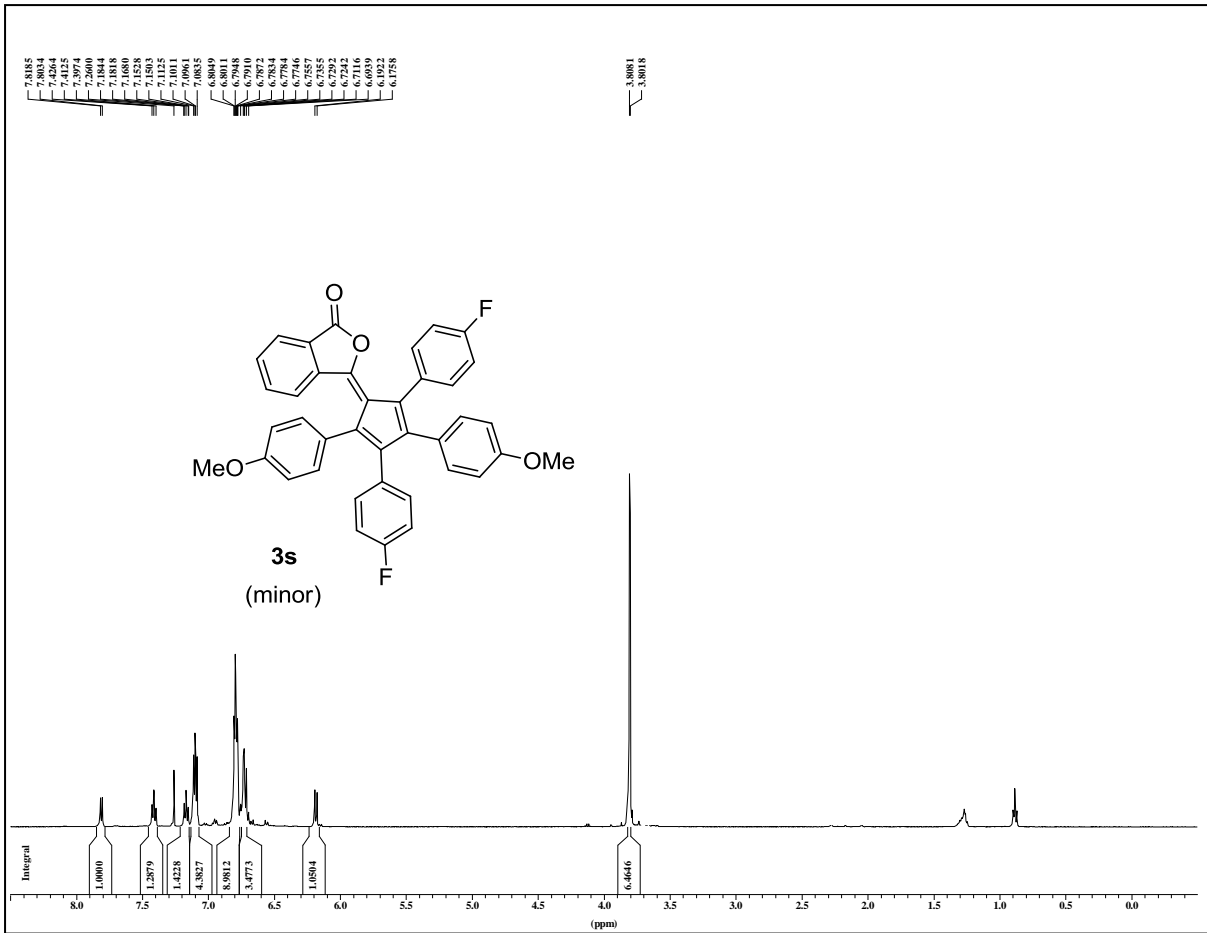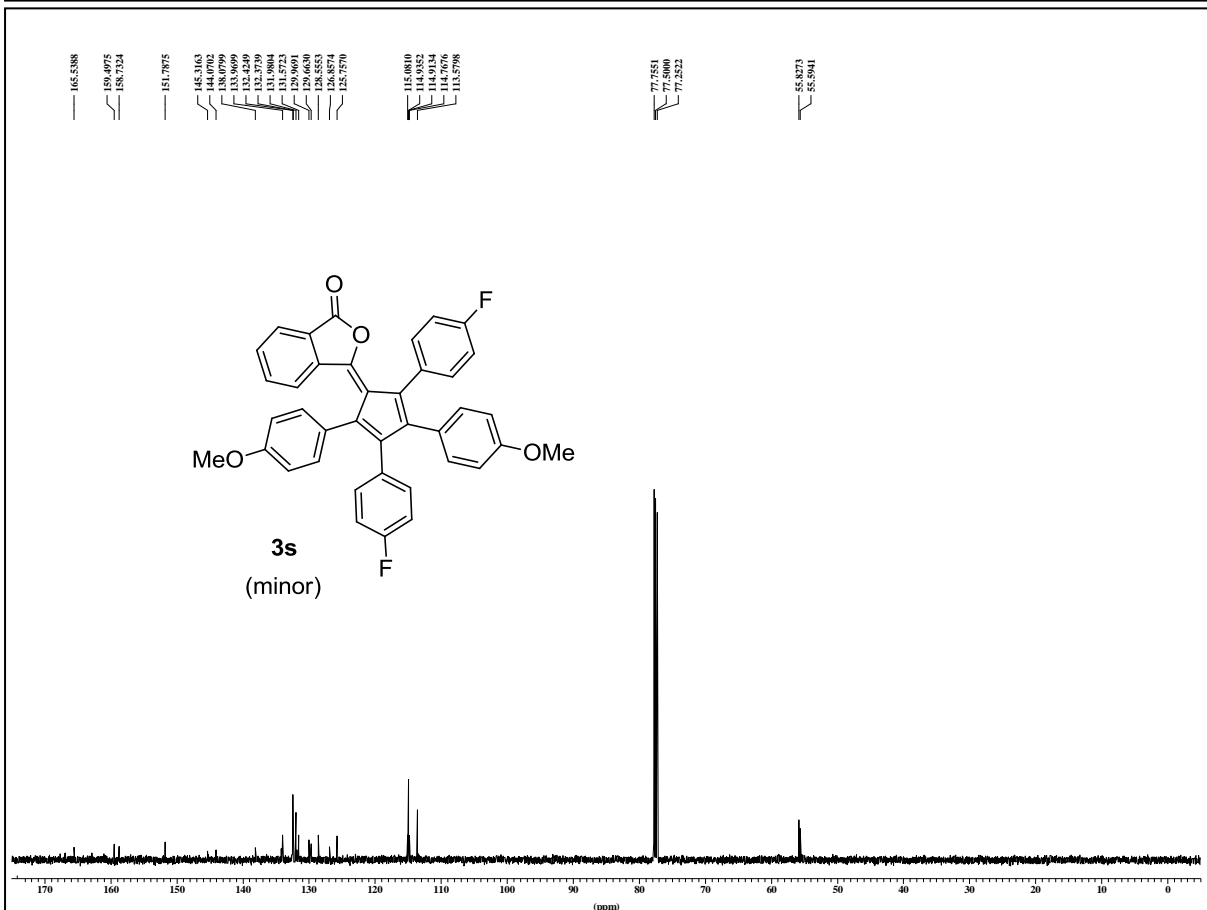

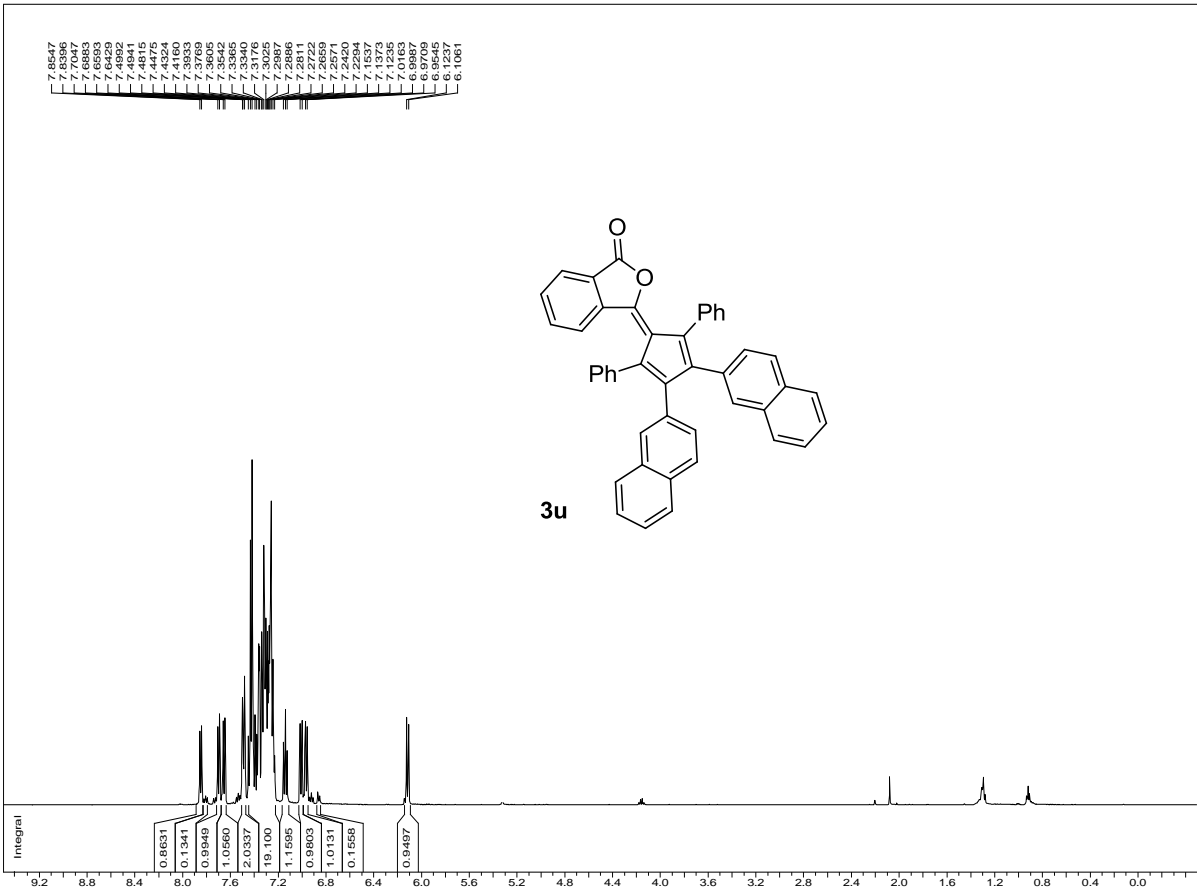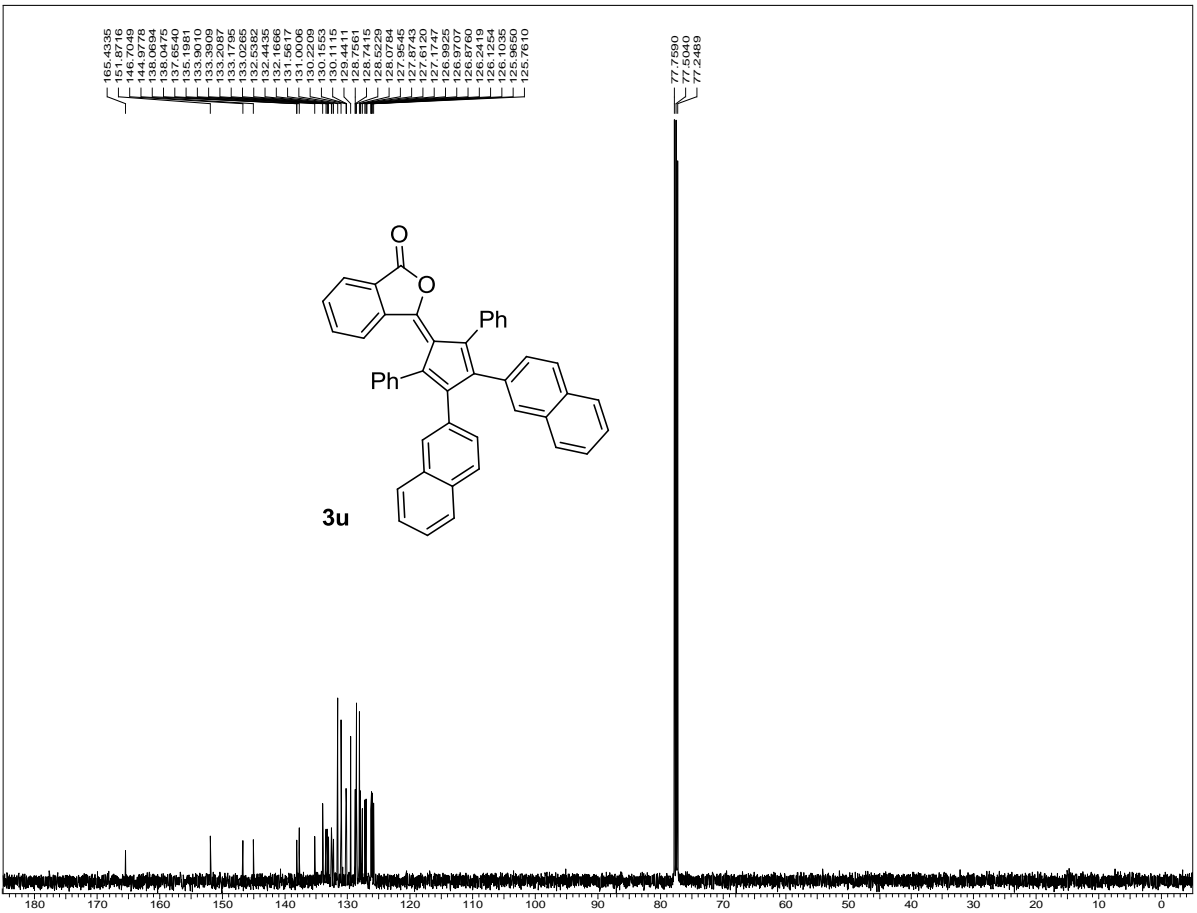





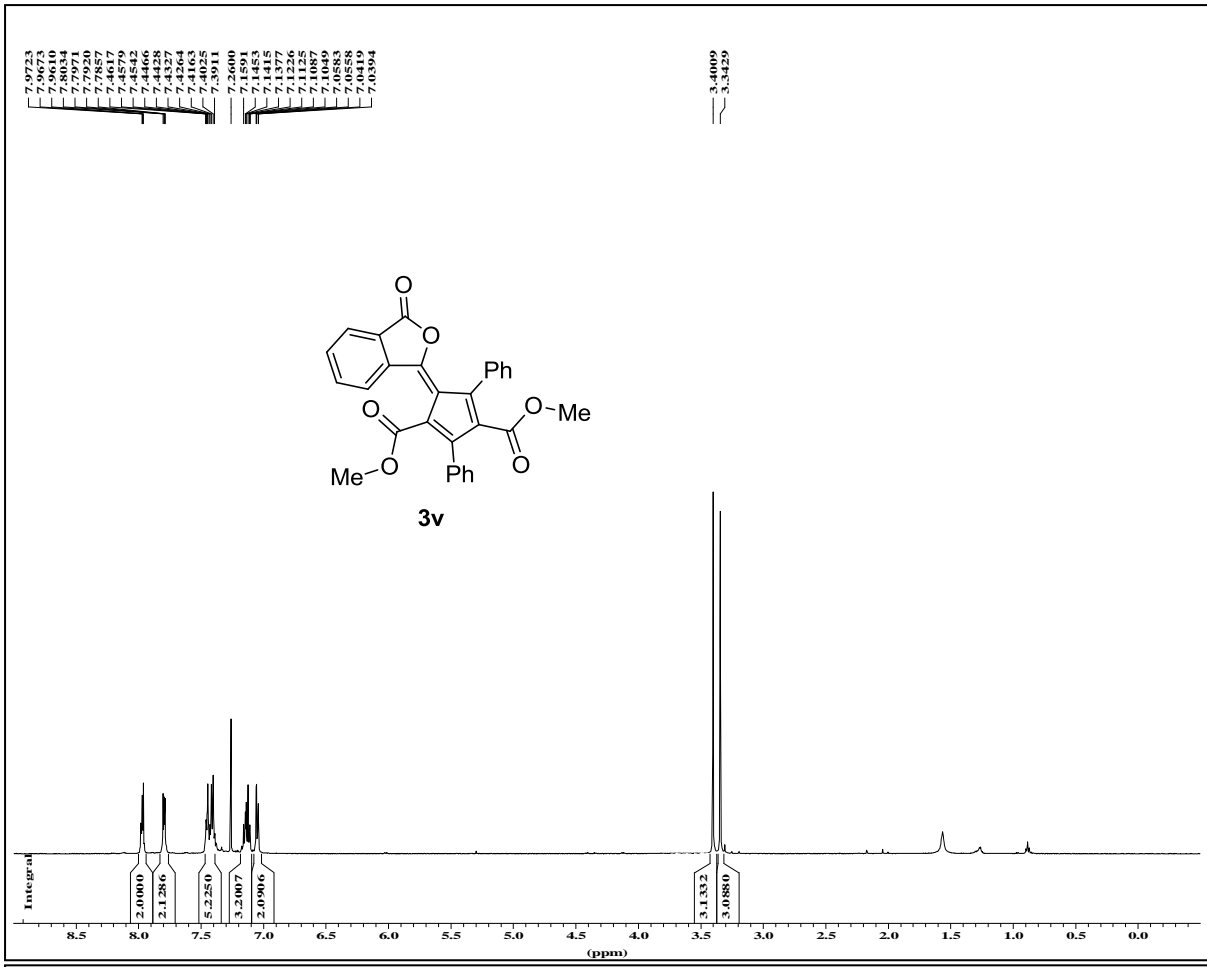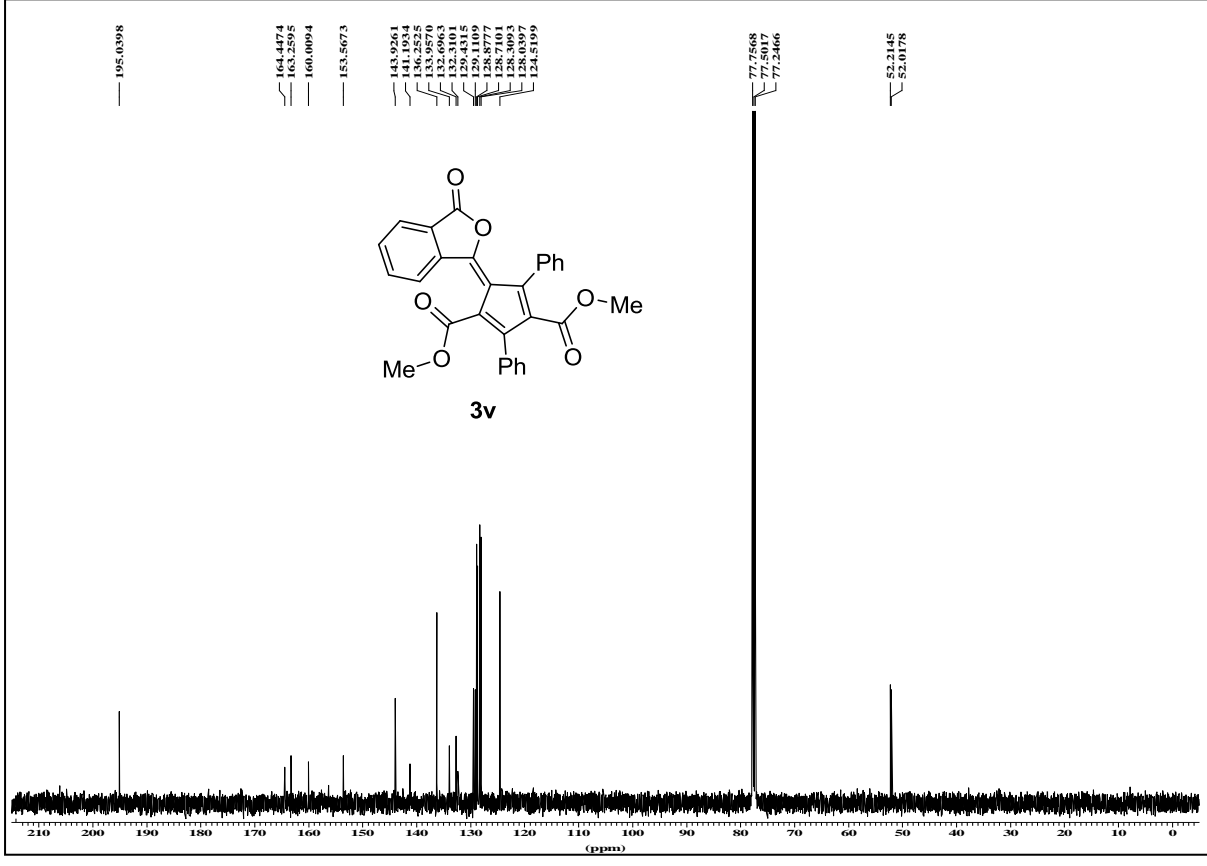

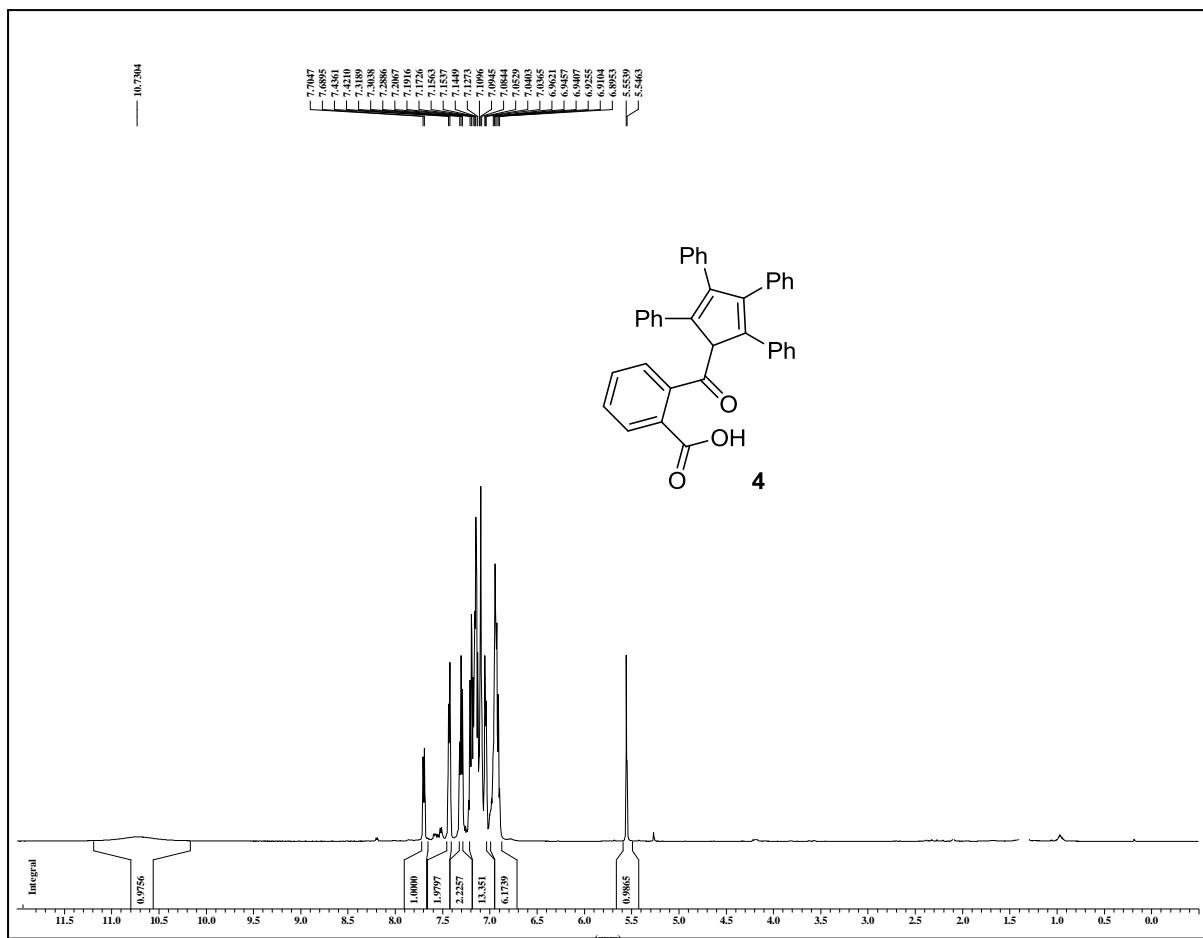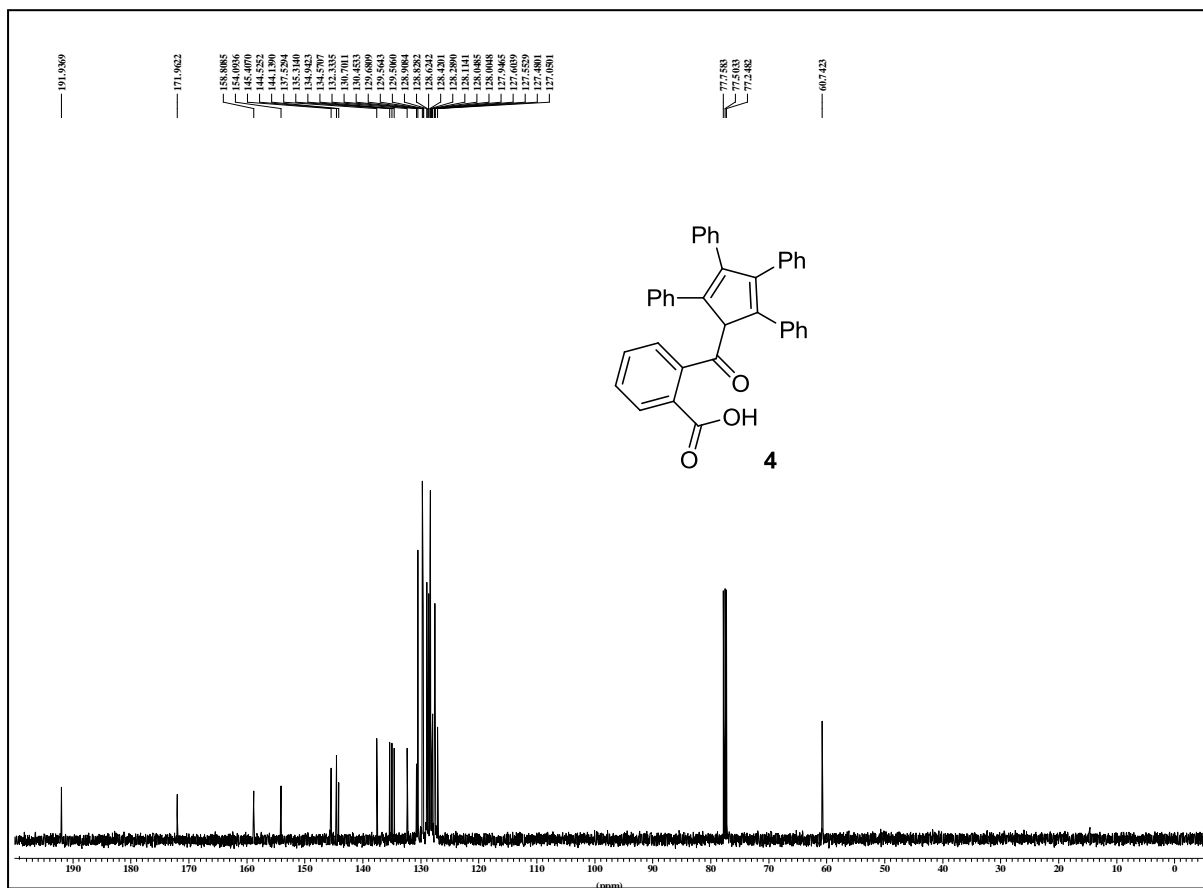

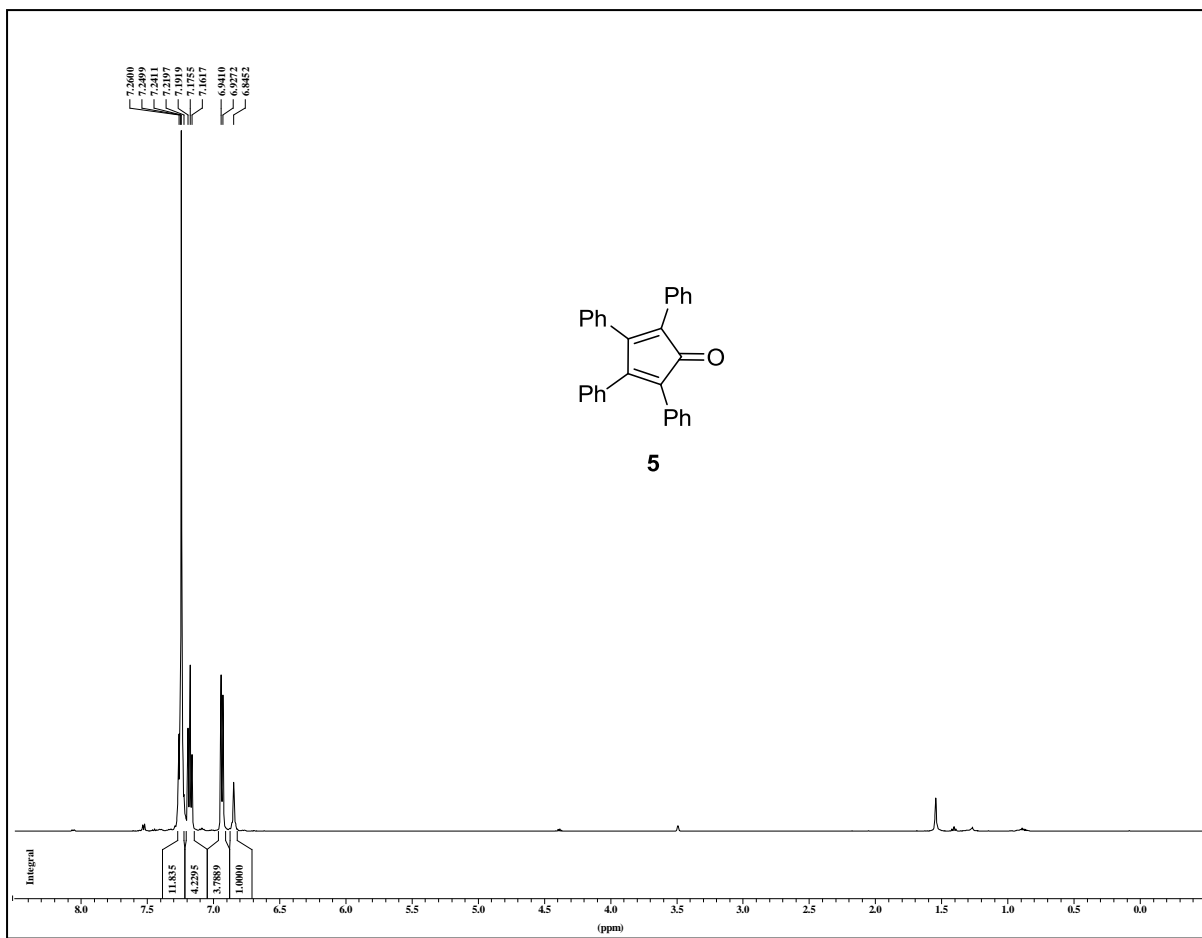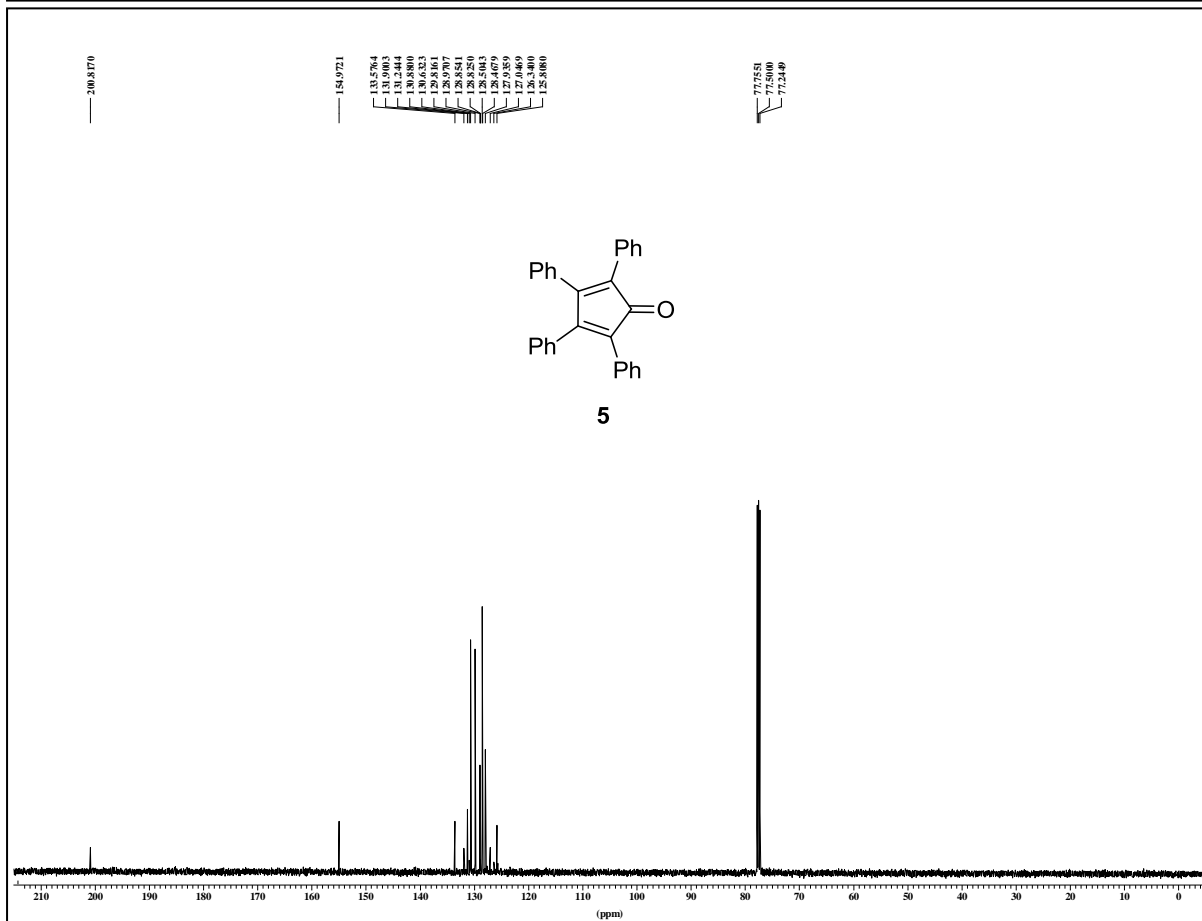

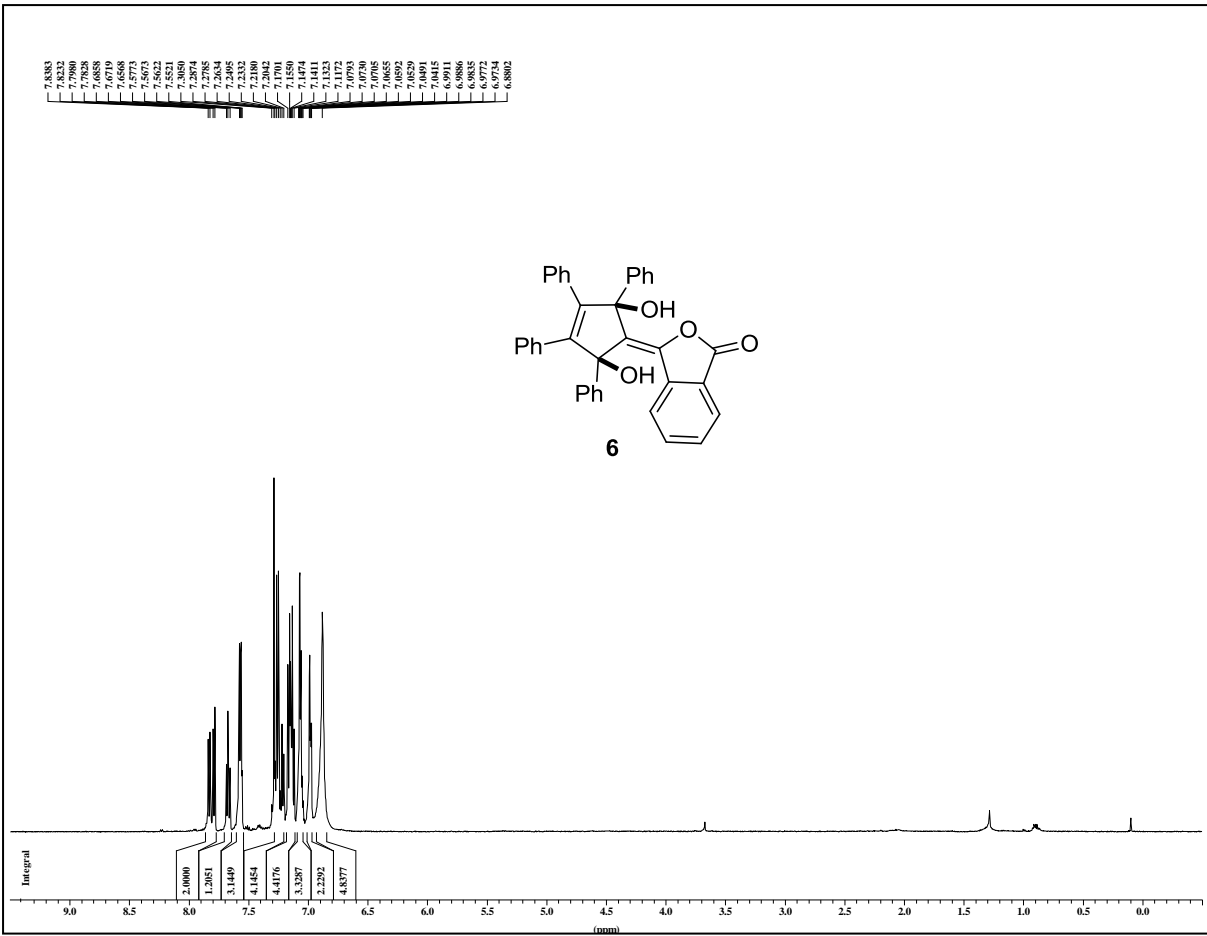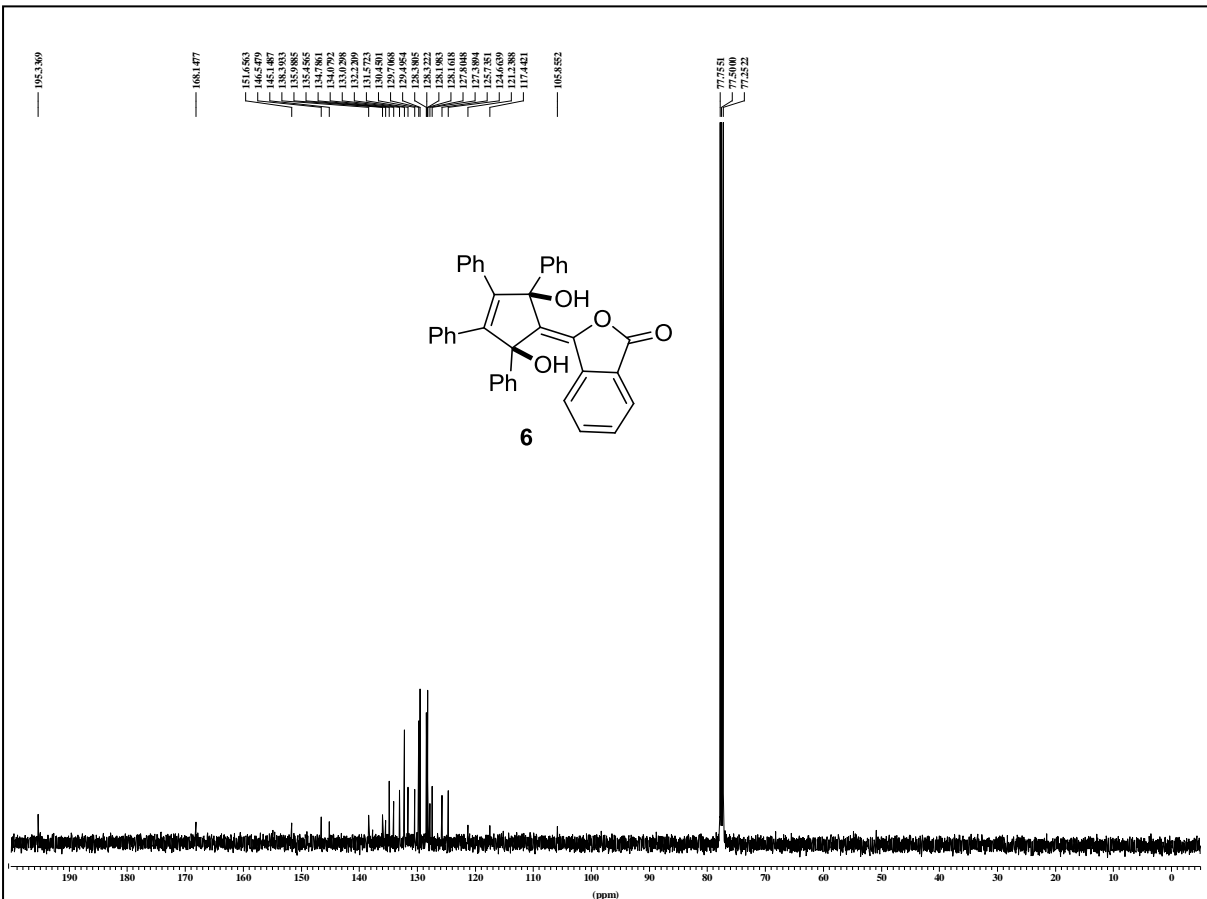

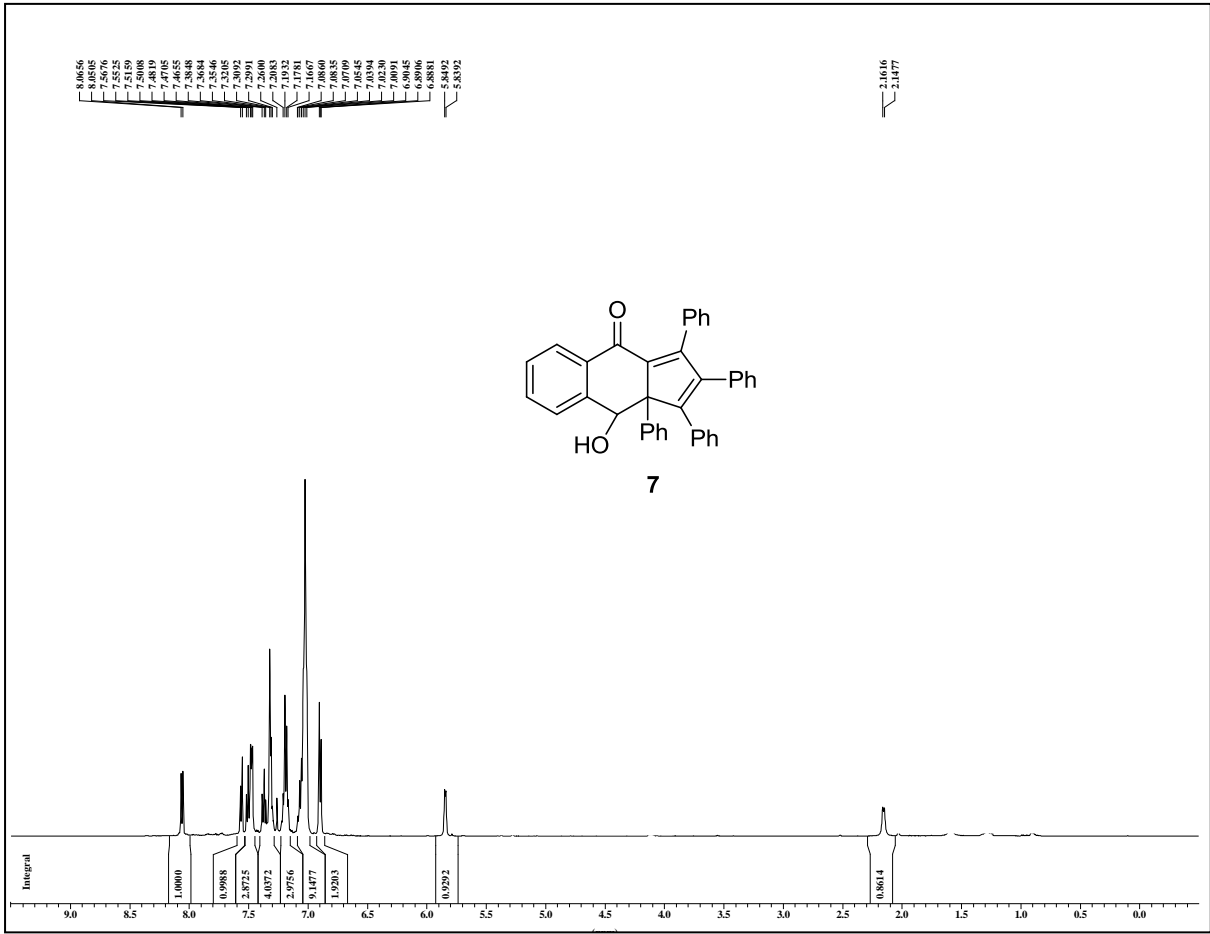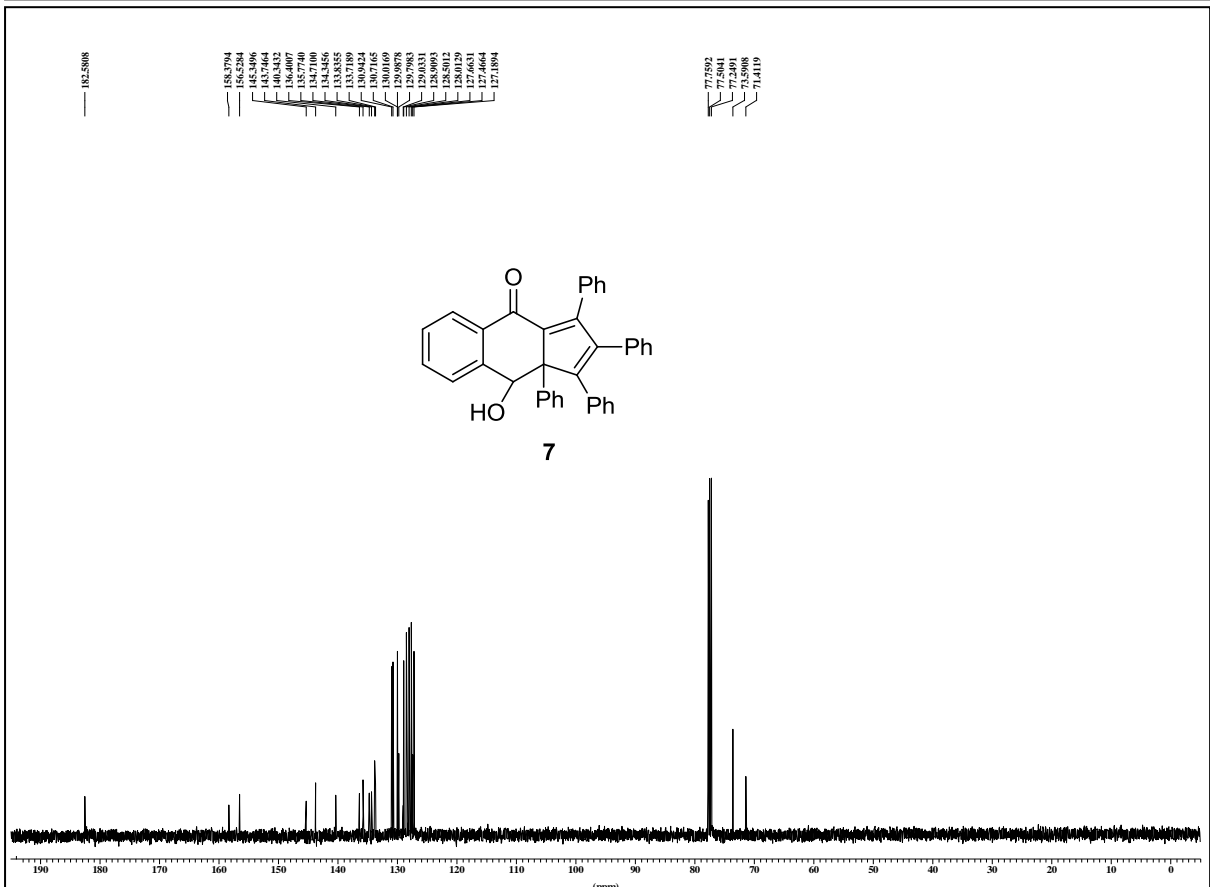

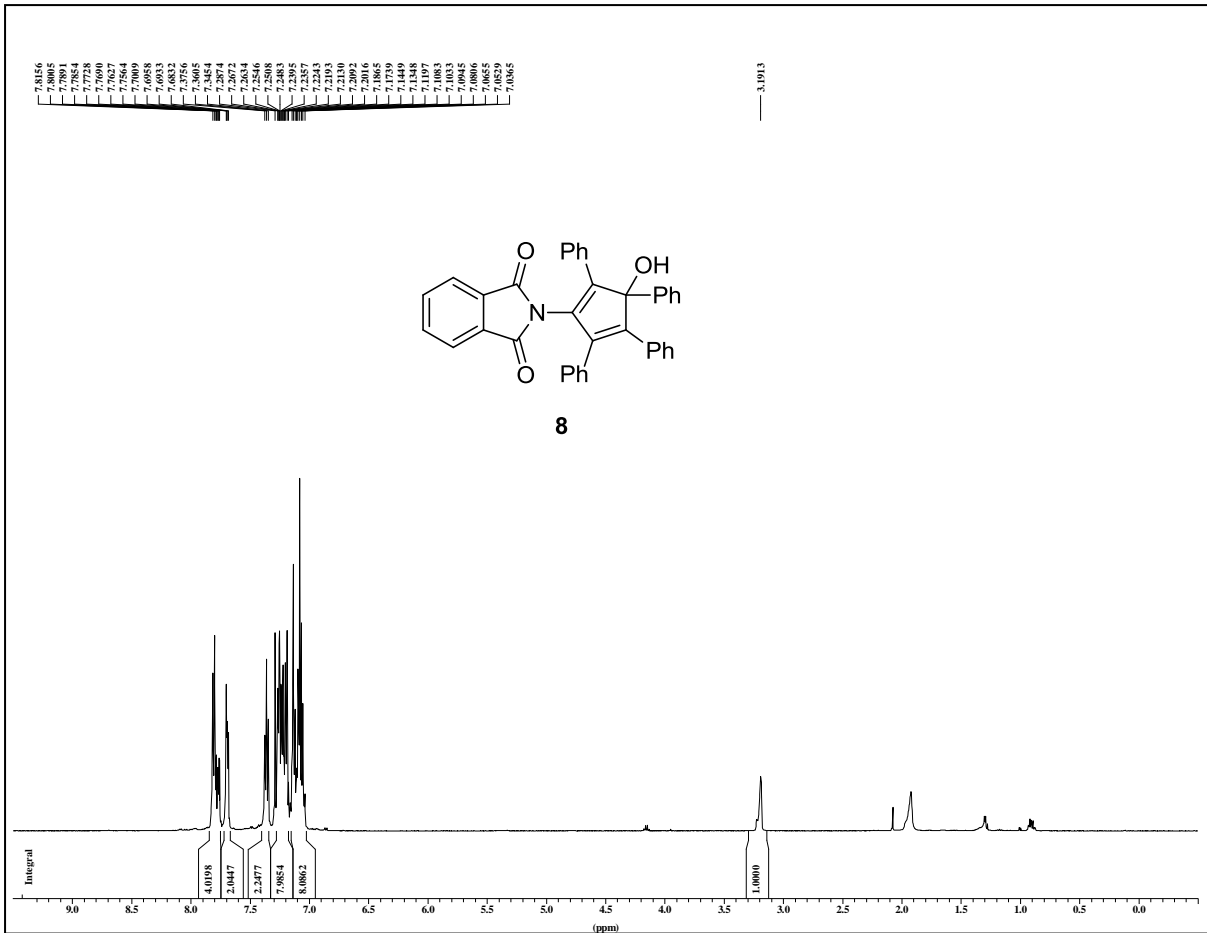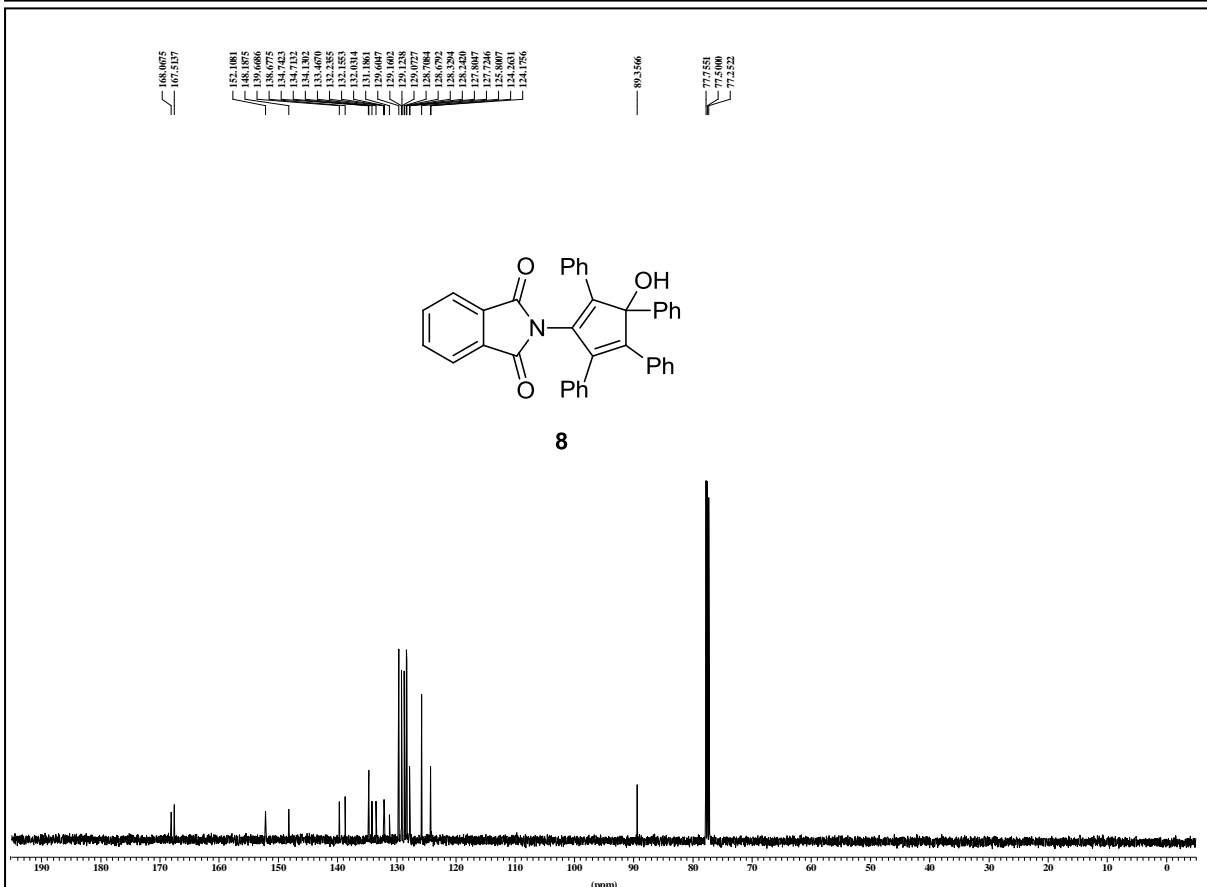

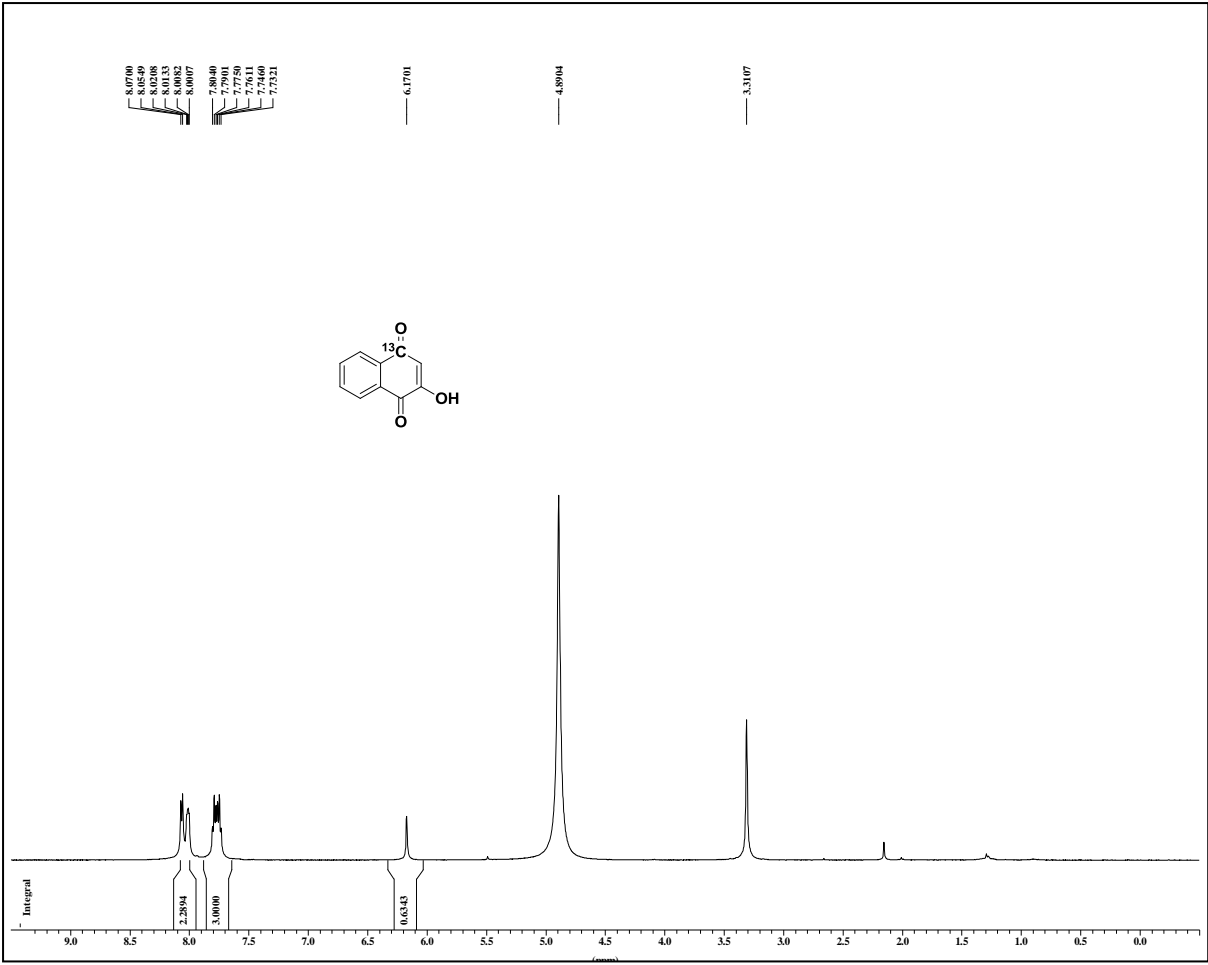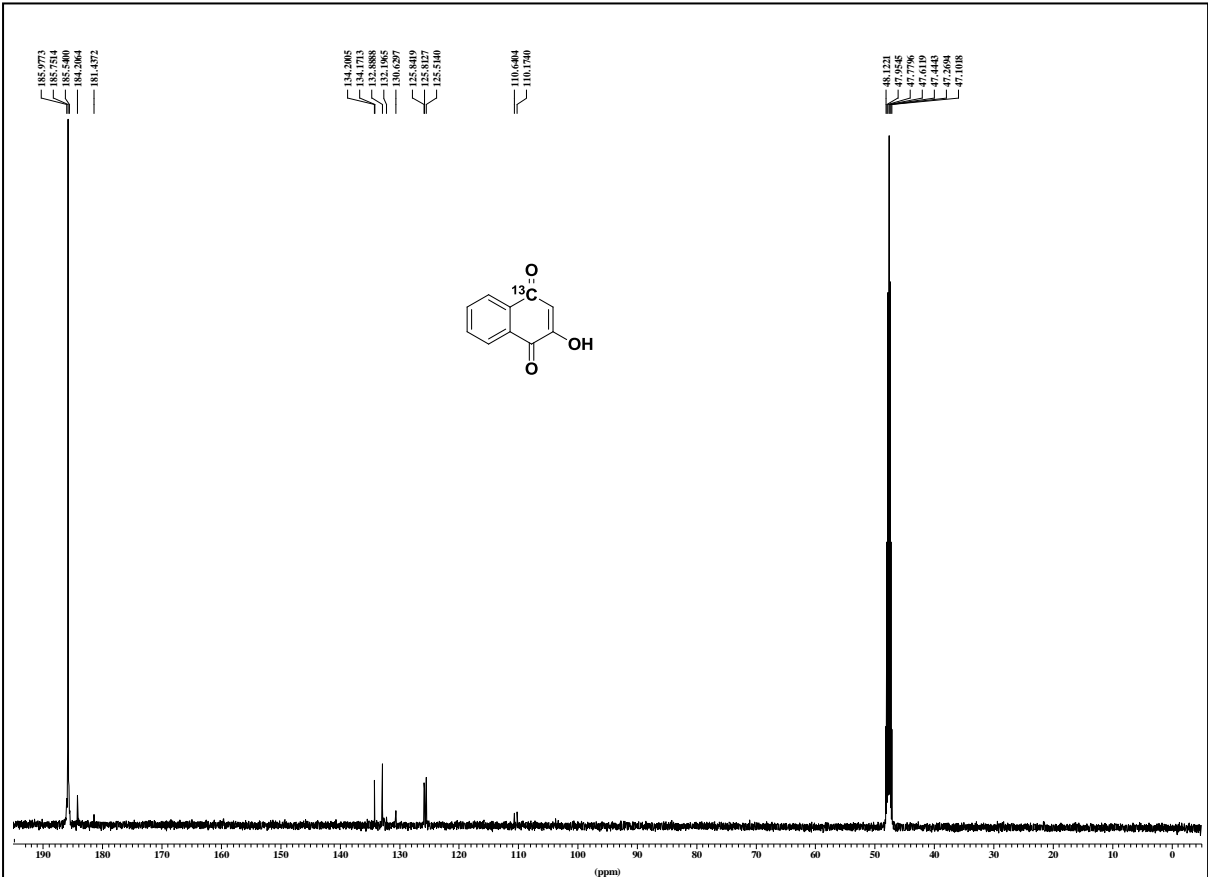

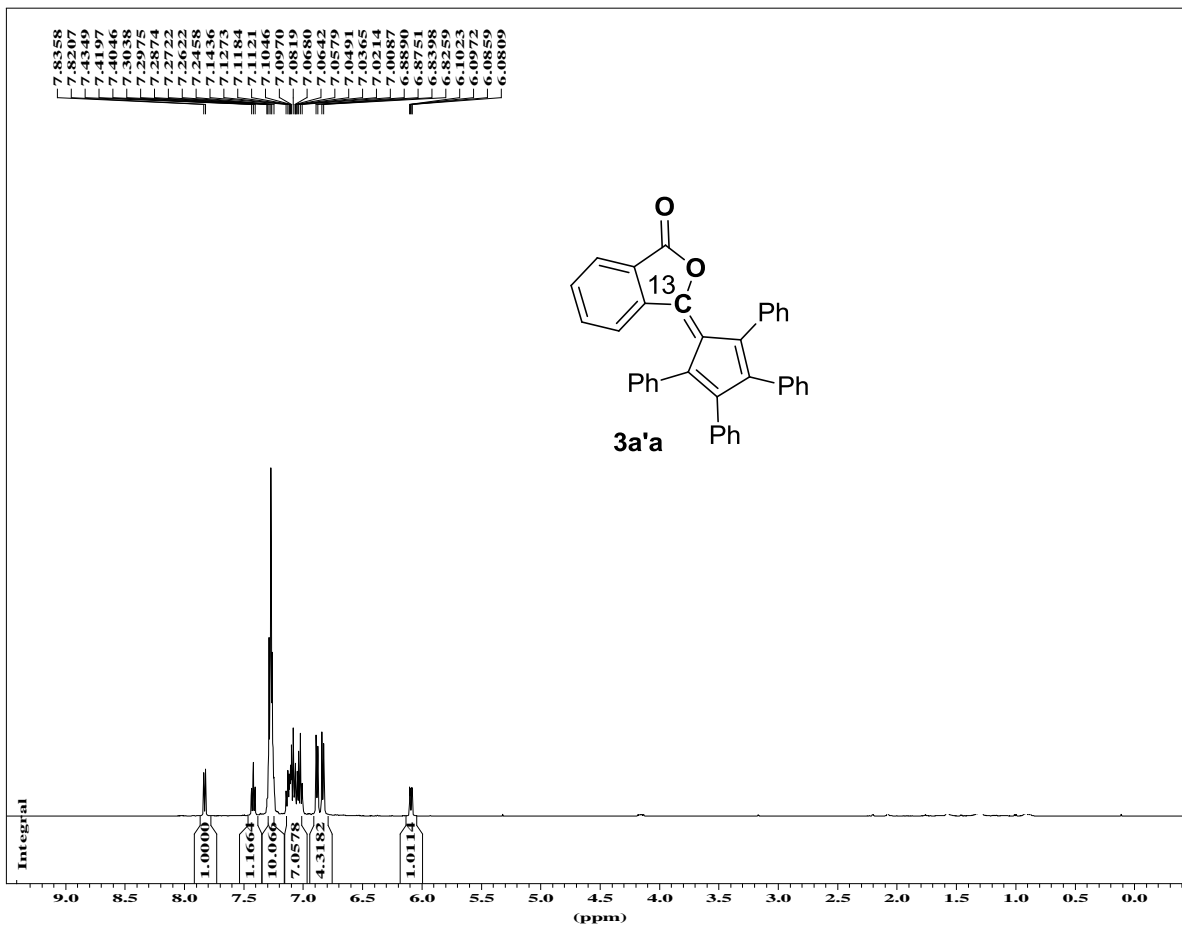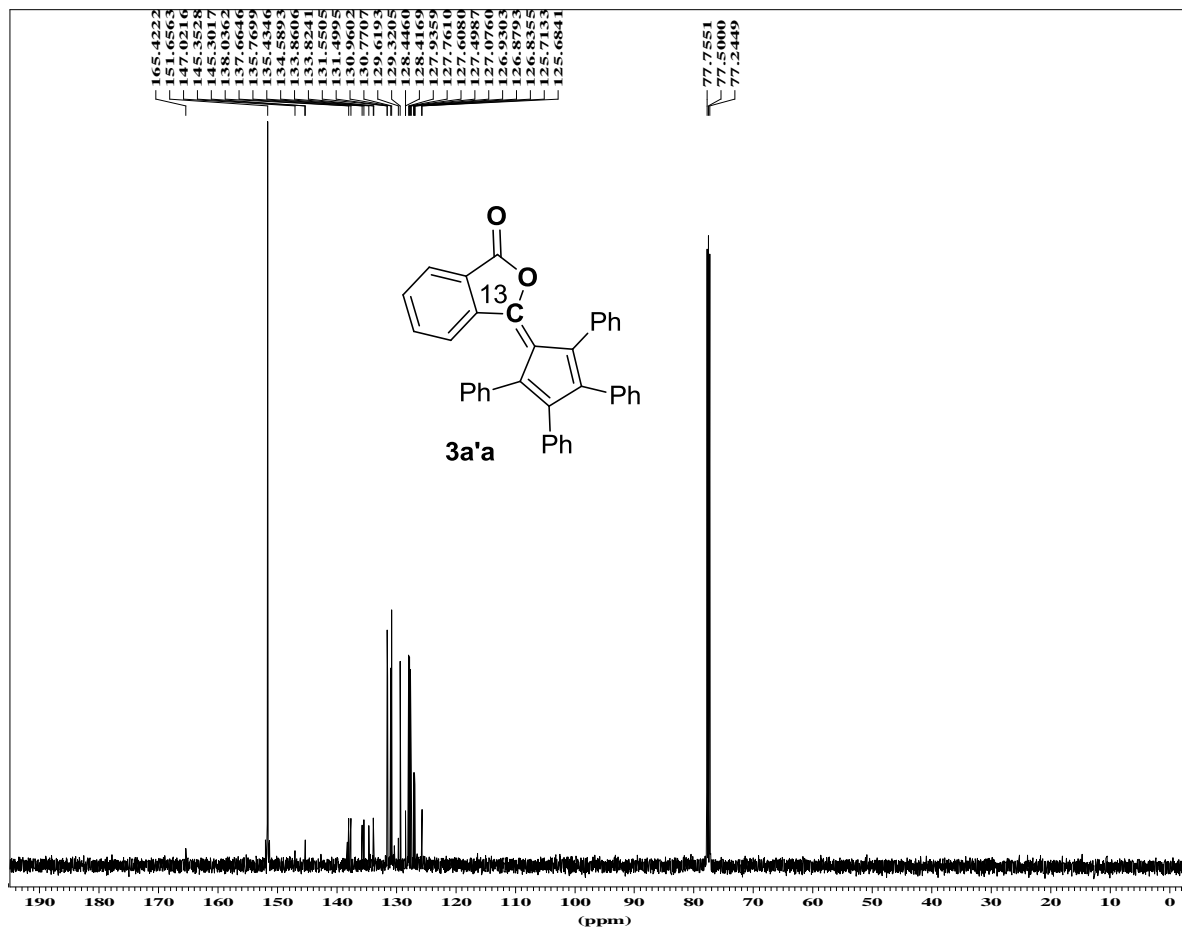



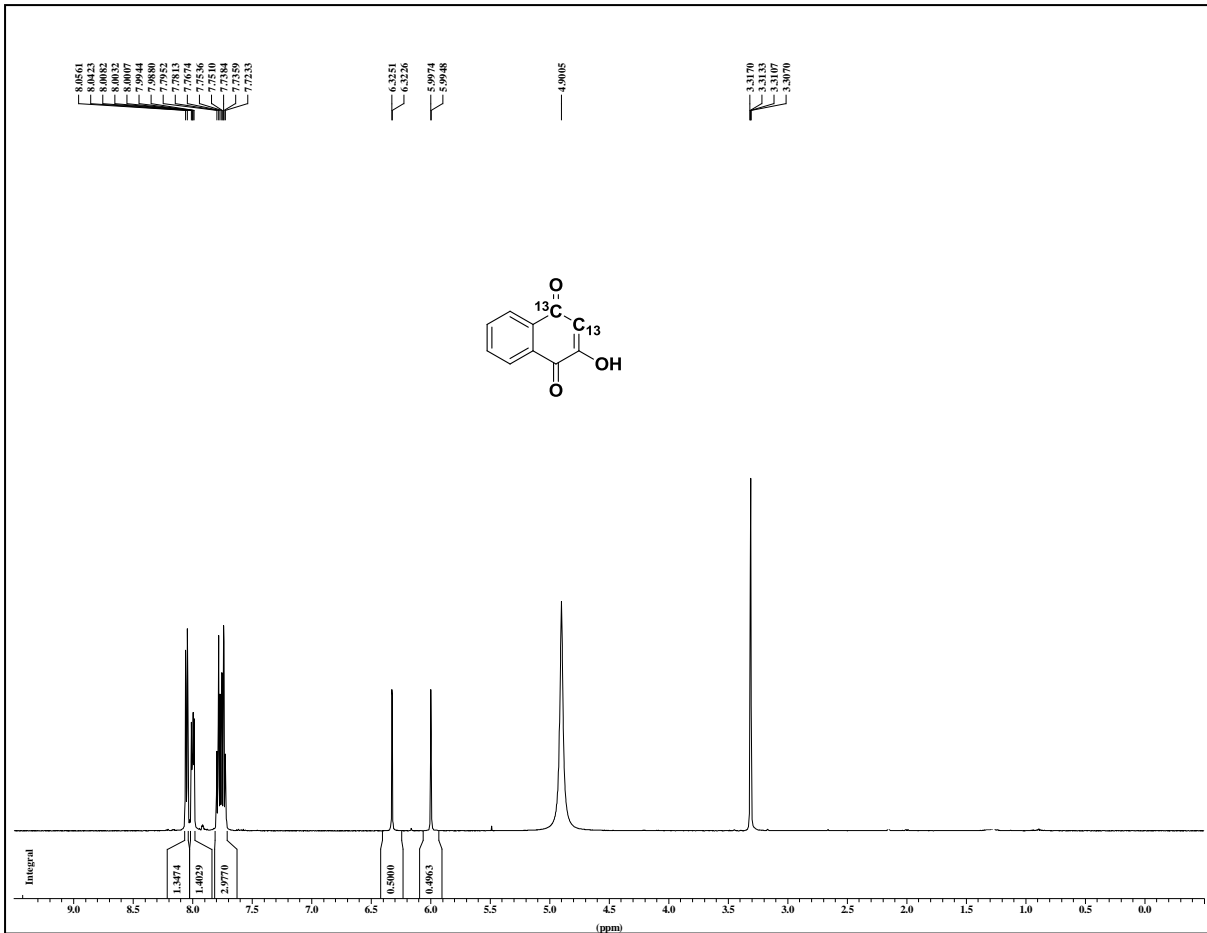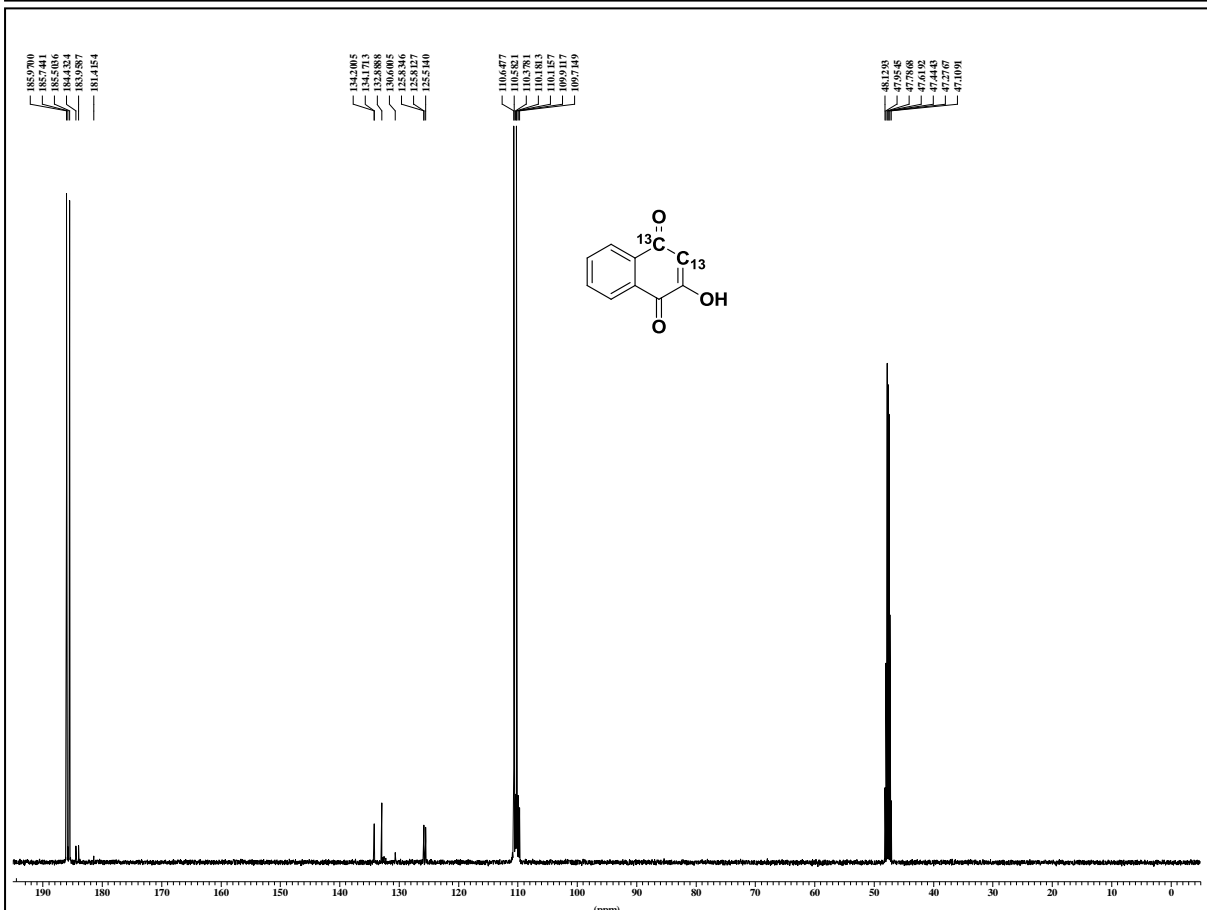

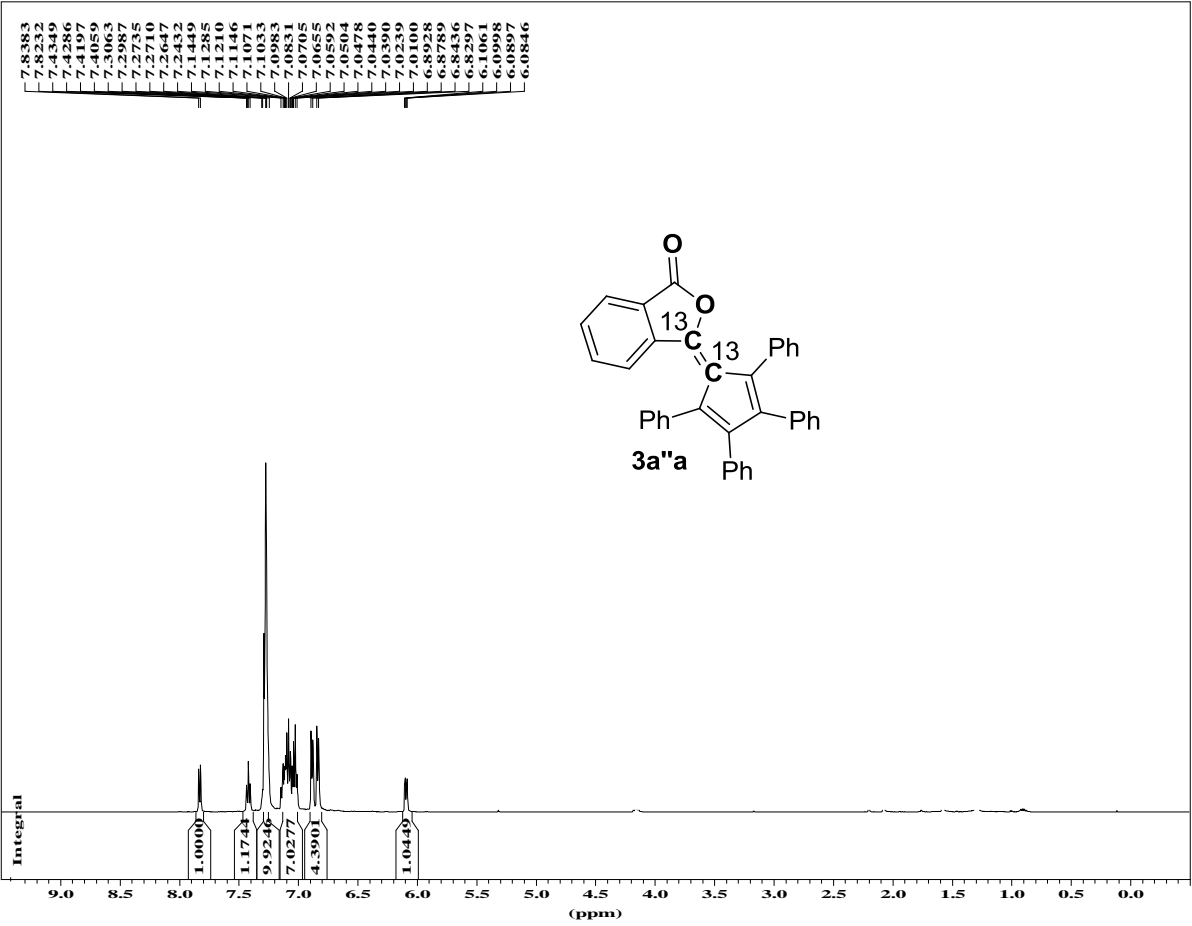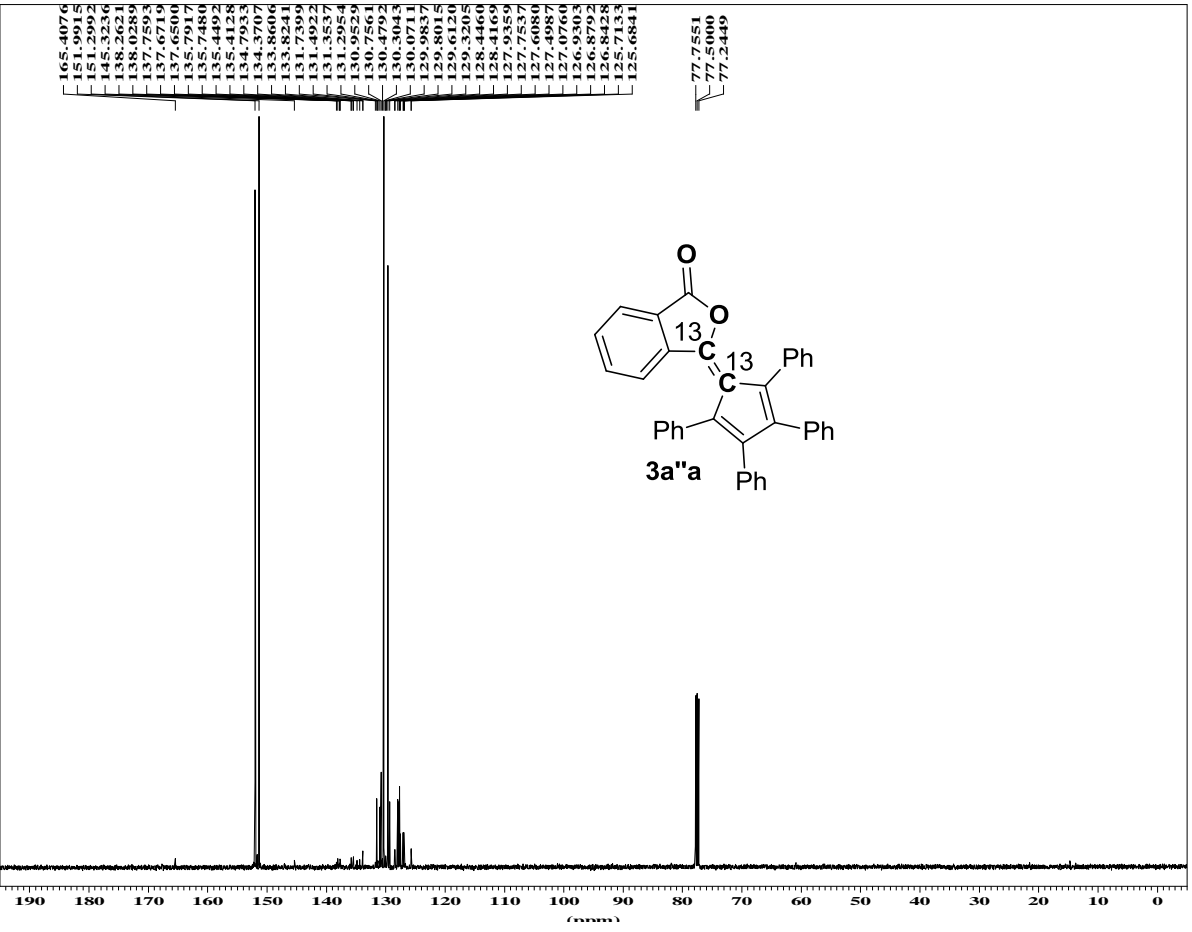

Supplement: c6qo00045b1.pdf [file c6qo00045b1.pdf]
